# Supplementary material for: Prevalence and genotype distribution of cervical human papilomavirus infection in the pre-vaccination era: a population-based study in the Canary Islands
Source: PubMed Central journal article supplement — BMJ Open. 2020 Sep 24;10(9):e037402. doi: 10.1136/bmjopen-2020-037402 (PMC7517562; doi:10.1136/bmjopen-2020-037402), 2020-09-24
Supplement: bmjopen-2020-037402.draft_revisions.pdf [file bmjopen-2020-037402.draft_revisions.pdf]

# BMJ Open

BMJ Open is committed to open peer review. As part of this commitment we make the peer review history of every article we publish publicly available.

When an article is published we post the peer reviewers' comments and the authors' responses online. We also post the versions of the paper that were used during peer review. These are the versions that the peer review comments apply to.

The versions of the paper that follow are the versions that were submitted during the peer review process. They are not the versions of record or the final published versions. They should not be cited or distributed as the published version of this manuscript.

BMJ Open is an open access journal and the full, final, typeset and author-corrected version of record of the manuscript is available on our site with no access controls, subscription charges or pay-per-view fees (<http://bmjopen.bmj.com>).

If you have any questions on BMJ Open's open peer review process please email [info.bmjopen@bmj.com](mailto:info.bmjopen@bmj.com)

# BMJ Open

## PREVALENCE AND GENOTYPE DISTRIBUTION OF CERVICAL HUMAN PAPILOMAVIRUS INFECTION IN THE PRE-VACCINATION ERA: A POPULATION-BASED STUDY IN THE CANARY ISLANDS

|                               |                                                                                                                                                                                                                                                                                                                                                                                                                                                                                                                                                                                                                                                                                                                                                                                                                                                                                                                                                                                                                                                                                                                                                                                                                                                                                                                                                                                                                                                                                                                                                                                                                                                                                                                                                                                                                                                                                                                                                                                                                                                                                                                                                                                                   |
|-------------------------------|---------------------------------------------------------------------------------------------------------------------------------------------------------------------------------------------------------------------------------------------------------------------------------------------------------------------------------------------------------------------------------------------------------------------------------------------------------------------------------------------------------------------------------------------------------------------------------------------------------------------------------------------------------------------------------------------------------------------------------------------------------------------------------------------------------------------------------------------------------------------------------------------------------------------------------------------------------------------------------------------------------------------------------------------------------------------------------------------------------------------------------------------------------------------------------------------------------------------------------------------------------------------------------------------------------------------------------------------------------------------------------------------------------------------------------------------------------------------------------------------------------------------------------------------------------------------------------------------------------------------------------------------------------------------------------------------------------------------------------------------------------------------------------------------------------------------------------------------------------------------------------------------------------------------------------------------------------------------------------------------------------------------------------------------------------------------------------------------------------------------------------------------------------------------------------------------------|
| Journal:                      | <i>BMJ Open</i>                                                                                                                                                                                                                                                                                                                                                                                                                                                                                                                                                                                                                                                                                                                                                                                                                                                                                                                                                                                                                                                                                                                                                                                                                                                                                                                                                                                                                                                                                                                                                                                                                                                                                                                                                                                                                                                                                                                                                                                                                                                                                                                                                                                   |
| Manuscript ID                 | bmjopen-2020-037402                                                                                                                                                                                                                                                                                                                                                                                                                                                                                                                                                                                                                                                                                                                                                                                                                                                                                                                                                                                                                                                                                                                                                                                                                                                                                                                                                                                                                                                                                                                                                                                                                                                                                                                                                                                                                                                                                                                                                                                                                                                                                                                                                                               |
| Article Type:                 | Original research                                                                                                                                                                                                                                                                                                                                                                                                                                                                                                                                                                                                                                                                                                                                                                                                                                                                                                                                                                                                                                                                                                                                                                                                                                                                                                                                                                                                                                                                                                                                                                                                                                                                                                                                                                                                                                                                                                                                                                                                                                                                                                                                                                                 |
| Date Submitted by the Author: | 31-Jan-2020                                                                                                                                                                                                                                                                                                                                                                                                                                                                                                                                                                                                                                                                                                                                                                                                                                                                                                                                                                                                                                                                                                                                                                                                                                                                                                                                                                                                                                                                                                                                                                                                                                                                                                                                                                                                                                                                                                                                                                                                                                                                                                                                                                                       |
| Complete List of Authors:     | <p>ANDUJAR, MIGUEL; Complejo Hospitalario Universitario Insular Materno Infantil, Pathology</p> <p>ROURA, ESTHER; Catalan Institute of Oncology, Unit of Infections and Cancer - Information and Interventions (UNIC-I&amp;I) - Cancer Epidemiology Research Program (CERP) - Institut d'Investigació Biomèdica de Bellvitge (IDIBELL); Centro de Investigación Biomédica en Red de Epidemiología y Salud Pública (CIBERESP)</p> <p>TORRES, ALEJANDRA; Complejo Hospitalario Universitario Insular Materno Infantil, Department of Obstetrics and Gynecology</p> <p>VEGA, BEGOÑA; Complejo Hospitalario Universitario Insular Materno Infantil, Department of Obstetrics and Gynecology</p> <p>PAVCOVICH, MARTA; Complejo Hospitalario Universitario Insular Materno Infantil, Pathology</p> <p>SANCHEZ, MIGUEL ANGEL; Complejo Hospitalario Universitario Insular Materno Infantil, Pathology</p> <p>LUBRANO, AMINA; Complejo Hospitalario Universitario Insular Materno Infantil, Obstetrics and Gynecology</p> <p>TRUJILLO, JOSE LUIS; Hospital Universitario de Canarias, Obstetrics and Gynecology</p> <p>ALMEIDA, LUCIA; Hospital Universitario Nuestra Señora de la Candelaria, Obstetrics and Gynecology</p> <p>SANTANA, MILAGROS; Complejo Hospitalario Universitario Insular Materno Infantil, Pathology</p> <p>HURTADO, ROSAURA; Complejo Hospitalario Universitario Insular Materno Infantil, Obstetrics and Gynecology</p> <p>ARENCIBIA, OCTAVIO; Complejo Hospitalario Universitario Insular Materno Infantil, Obstetrics and Gynecology</p> <p>BENITO, VIRGINIA; Complejo Hospitalario Universitario Insular Materno Infantil, Obstetrics and Gynecology</p> <p>MEDINA, NORBERTO; Complejo Hospitalario Universitario Insular Materno Infantil, Obstetrics and Gynecology</p> <p>CARBALLO, SONIA; Complejo Hospitalario Universitario Insular Materno Infantil, Obstetrics and Gynecology</p> <p>CAMACHO, MARIA DEL CARMEN; Complejo Hospitalario Universitario Insular Materno Infantil, Pathology</p> <p>RUIZ DEL POZO, ARANCHA; Complejo Hospitalario Universitario Insular Materno Infantil, Pathology</p> <p>QUESADA, ALFOSO; Hospital Universitario Nuestra Señora de la</p> |

|           |                                                                                                                                                                                                                                                                                                                                                                                                                                                                                                                                                                                                                                     |
|-----------|-------------------------------------------------------------------------------------------------------------------------------------------------------------------------------------------------------------------------------------------------------------------------------------------------------------------------------------------------------------------------------------------------------------------------------------------------------------------------------------------------------------------------------------------------------------------------------------------------------------------------------------|
|           | Candelaria, Obstetrics and Gynecology<br>SALIDO, EDUARDO; Hospital Universitario de Canarias, Pathology<br>De Sanjosé, Silvia ; PATH, Reproductive Health Global Programme;<br>Catalan Institute of Oncology, Cancer Epidemiology Research Program<br>(CERP) - Institut d'Investigació Biomèdica de Bellvitge (IDIBELL)<br>Bruni, Laia; Catalan Institute of Oncology, Unit of Infections and Cancer<br>- Information and Interventions (UNIC-I&I) - Cancer Epidemiology<br>Research Program (CERP) - Institut d'Investigació Biomèdica de Bellvitge<br>(IDIBELL); Centro de Investigación Biomédica en Red de Cáncer<br>(CIBERONC) |
| Keywords: | CYTOPATHOLOGY, Gynaecological oncology < GYNAECOLOGY,<br>EPIDEMIOLOGY, INFECTIOUS DISEASES                                                                                                                                                                                                                                                                                                                                                                                                                                                                                                                                          |
|           |                                                                                                                                                                                                                                                                                                                                                                                                                                                                                                                                                                                                                                     |

SCHOLARONE™  
Manuscripts

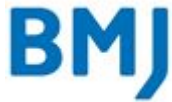

I, the Submitting Author has the right to grant and does grant on behalf of all authors of the Work (as defined in the below author licence), an exclusive licence and/or a non-exclusive licence for contributions from authors who are: i) UK Crown employees; ii) where BMJ has agreed a CC-BY licence shall apply, and/or iii) in accordance with the terms applicable for US Federal Government officers or employees acting as part of their official duties; on a worldwide, perpetual, irrevocable, royalty-free basis to BMJ Publishing Group Ltd ("BMJ") its licensees and where the relevant Journal is co-owned by BMJ to the co-owners of the Journal, to publish the Work in this journal and any other BMJ products and to exploit all rights, as set out in our [licence](#).

The Submitting Author accepts and understands that any supply made under these terms is made by BMJ to the Submitting Author unless you are acting as an employee on behalf of your employer or a postgraduate student of an affiliated institution which is paying any applicable article publishing charge ("APC") for Open Access articles. Where the Submitting Author wishes to make the Work available on an Open Access basis (and intends to pay the relevant APC), the terms of reuse of such Open Access shall be governed by a Creative Commons licence – details of these licences and which [Creative Commons](#) licence will apply to this Work are set out in our licence referred to above.

Other than as permitted in any relevant BMJ Author's Self Archiving Policies, I confirm this Work has not been accepted for publication elsewhere, is not being considered for publication elsewhere and does not duplicate material already published. I confirm all authors consent to publication of this Work and authorise the granting of this licence.

1 PREVALENCE AND GENOTYPE DISTRIBUTION OF CERVICAL HUMAN PAPILOMAVIRUS  
2 INFECTION IN THE PRE-VACCINATION ERA: A POPULATION-BASED STUDY IN THE  
3 CANARY ISLANDS  
4  
5

6 M Andújar<sup>1#</sup>, E Roura<sup>2,3</sup>, A Torres<sup>4</sup>, B Vega<sup>4</sup>, M Pavcovich<sup>1</sup>, MA Sánchez<sup>1</sup>, A Lubrano<sup>4</sup>, JL  
7 Trujillo<sup>5</sup>, L Almeida<sup>6</sup>, M Santana<sup>1</sup>, R Hurtado<sup>4</sup>, O Arencibia<sup>4</sup>, V Benito<sup>4</sup>, N Medina<sup>4</sup>, S  
8 Carballo<sup>4</sup>, MC Camacho<sup>1</sup>, A Ruiz-del-Pozo<sup>1</sup>, A Quesada<sup>6</sup>, E Salido<sup>7</sup>, S de Sanjosé<sup>3,8</sup>, L  
9 Bruni<sup>2,9</sup>, and the HPV Canary Study Group \*.  
10  
11  
12  
13  
14  
15

16 <sup>1#</sup> Corresponding author: Department of Pathology. Complejo Hospitalario  
17 Universitario Insular Materno Infantil, Avd. Marítima del Sur s/n. 35016. La Palmas de  
18 Gran Canaria, Spain. 34-28-308666. [mandsan@gobiernodecanarias.org](mailto:mandsan@gobiernodecanarias.org).  
19  
20

21 <sup>1</sup> Department of Pathology. Complejo Hospitalario Universitario Insular Materno  
22 Infantil, La Palmas de Gran Canaria, Spain.  
23  
24

25 <sup>2</sup> Unit of Infections and Cancer - Information and Interventions (UNIC-I&I) - Cancer  
26 Epidemiology Research Program (CERP), Catalan Institute of Oncology (ICO) –Institut  
27 d'Investigació Biomèdica de Bellvitge (IDIBELL), L'Hospitalet de Llobregat, Barcelona,  
28 Spain.  
29  
30  
31

32 <sup>3</sup> Centro de Investigación Biomédica en Red de Epidemiología y Salud Pública  
33 (CIBERESP), Madrid, Spain.  
34  
35

36 <sup>4</sup> Department of Obstetrics and Gynecology. Complejo Hospitalario Universitario  
37 Insular Materno Infantil, La Palmas de Gran Canaria, Spain.  
38  
39

40 <sup>5</sup> Department of Obstetrics and Gynecology. Hospital Universitario de Canarias, La  
41 Laguna, Tenerife, Spain.  
42  
43

44 <sup>6</sup> Department of Obstetrics and Gynecology. Hospital Nuestra Señora de la Candelaria,  
45 Santa Cruz de Tenerife, Tenerife, Spain.  
46  
47

48 <sup>7</sup> Department of Pathology. Hospital Universitario de Canarias, La Laguna, Tenerife,  
49 Spain.  
50

51 <sup>8</sup> Cancer Epidemiology Research Program (CERP), Catalan Institute of Oncology (ICO) –  
52 Institut d'Investigació Biomèdica de Bellvitge (IDIBELL), L'Hospitalet de Llobregat,  
53 Barcelona, Spain.  
54  
55

56 <sup>9</sup> Centro de Investigación Biomédica en Red de Cáncer (CIBERONC), Madrid, Spain.  
57  
58  
59  
60

## HPV Canary Study Group:

• **GRAN CANARIA TEAM**

|                              |                                |
|------------------------------|--------------------------------|
| Diana Alemán                 | Carmen Marrero                 |
| Mónica Almeida               | Ofelia Marrero                 |
| Ana María Arencibia          | Noa Mateos                     |
| María Isabel Armas           | Olivia Medina                  |
| Guillermina Batista          | Josefa Mendoza                 |
| Victoria Bernal              | Lucia Montesdeoca              |
| Francisca Bernaldo de Quirós | Rosa Monzón                    |
| Sili Bolaños                 | Cristina Morales               |
| Dolores Casaña               | Mercedes Morales               |
| Luisa Celedón                | M <sup>a</sup> Dolores Navarro |
| Isabel Cruz                  | María Ángeles Nieto            |
| Elisa Díaz                   | Noelia Pérez                   |
| Inocencia Duarte             | Yurena Pérez                   |
| Felisa Expósito              | Antonio Ramos                  |
| Carmelo Felipe               | Antonio Rico                   |
| Carlos Galván                | Margarita Roldán               |
| María José García            | Esther Salamanca               |
| María Isabel García          | Rosario Sánchez                |
| Vanesa García                | Raquel Santana                 |
| Virginia García              | Elvira Santos                  |
| Elena Giménez                | Antonia Solanes                |
| Teresa Godoy                 | Elisabeth Soutto               |
| Catalina Gómez               | Dulce Suarez                   |
| Lucía González               | María Jesús Suárez             |
| Luisa Gutiérrez              | María Ángeles Tadeo            |
| Mónica Hernández             | Virgen Valdés                  |
| Delia Herrera                | Gabriela Valido                |
| Laura Herrera                | Iralla Vega                    |
| Rosario Laseca               | María del Pino Vega            |

• **TENERIFE TEAM**

María Angeles Afonso  
Elisa Baena  
María Pilar Baz  
José de Armas  
Alicia de la Puerta  
Josefina García  
María Asuncion González  
Célida González  
María Teresa Hernández  
Josefa Limiñana  
Carmen Rosa León  
Fernando Marín  
Emma Manrique  
José Roberto Negrín  
Rosa Olavarrieta  
Verónica Perera  
Concepción Sabater  
Candelaria Sosvilla

## ABSTRACT

Keywords: cytopathology, gynaecological oncology, epidemiology, infectious diseases.

### Objective

National Spanish studies show that prevalence of cervical Human Papillomavirus (HPV) infection in the female population is increasingly frequent, with an overall estimate of 14% in women aged 18-65 years. The objective of this study is to know the prevalence and distribution of HPV types in the female population of the Canary Islands prior to the introduction of HPV vaccines and to investigate the associated clinical and socio-demographic factors.

### Methods

Based on the Primary Health Care database, a sample of adult women (18-65 years) of Gran Canaria (GC) and Tenerife (TF) stratified into 9 age groups was carried out. Women were contacted by postal letter and telephone call and were visited in their primary care center. A clinical-epidemiological survey was completed and cervical samples were taken for cytological study and HPV detection. HPV prevalence and its 95% confidence interval were estimated, and multivariate analyzes were performed using logistic regression to identify factors associated with the infection.

### Results

6,010 women participated in the study, 3,847 from GC and 2,163 from TF. The overall prevalence of HPV infection was 13.6% (12.8-14.5%) and 11.1% (10.3-11.9%) for high-risk types. The most frequent HPV type was 16 followed by types 51, 53, 31, 42 and 59. HPV types included in the nonavalent vaccine were detected in 54.1% of infected women. Factors associated with an increased risk of infection were: young ages (18-29 years), the number of sexual partners throughout life, not being married, being a smoker, and having had previous cervical lesions or genital warts.

### Conclusions

It is confirmed that prevalence of HPV infection in the female population of the Canary Islands is high, but similar to that of Spain. The determinants of infection are consistent with those of other populations.

1                    ***Strengths and limitations of this study:***  
2  
3

- 4                    • This is the first prevalence study of HPV infection in Canary Islands.  
5  
6                    • The study design is population-based, including the main healthcare centers of the  
7  
8                    participant regions.  
9  
10  
11                   • Cytological and molecular samples were analyzed in the same laboratory by the same  
12  
13                   staff, using highly-sensitive and partially automated techniques that ensured  
14  
15                   consistency, homogeneity and reproducibility of diagnostic methods.  
16  
17  
18                   • Study recruitment time was extensive, from three to six years depending on the  
19  
20                   region.  
21  
22  
23                   • Characteristics of the study participants could be different over time .  
24  
25  
26  
27  
28  
29  
30  
31  
32  
33  
34  
35  
36  
37  
38  
39  
40  
41  
42  
43  
44  
45  
46  
47  
48  
49  
50  
51  
52  
53  
54  
55  
56  
57  
58  
59  
60



## 1. INTRODUCTION

Cervical cancer is the fourth most common female cancer worldwide and the second most frequent among young women aged 15-44 years, with an estimated 569,847 new cases in 2018.<sup>1</sup> In Spain, cervical cancer is the fifteenth most frequent cancer in women (fourth in women aged 15-44 years), with an estimated 1,942 new cases in 2018.<sup>1</sup> In the Canary Islands autonomous community, 356 new cases were diagnosed in 2008-2011, with a crude rate of 10.1 cases per 100,000 women,<sup>2</sup> one of the highest incidence rates in Spain.<sup>3</sup>

Human papillomavirus (HPV) is a necessary but not sufficient cause of cervical cancer.<sup>4</sup> More than 200 HPV genotypes are currently known, epidemiologically classified into low-oncogenic risk (LR-HPV) and high-oncogenic risk (HR-HPV) types.<sup>5</sup> HR-HPV types include 16 and 18 genotypes, present in more than 70% of cervical cancer cases<sup>6</sup> and included in the three prophylactic HPV vaccines currently commercialized.<sup>7,8</sup>

No robust estimations of HPV infection prevalence are available for the Canary Islands, which hinders comparisons with the rest of Spain. Changes in Spanish women's sexual behavior in the last decades have leads to increased HPV infection rates (up to 14% in 18-65 years old women, 29% of them in women younger than 25 years).<sup>9</sup> Baseline prevalence estimations of HPV infection and the genotype distributions are essential to monitor the impact of HPV-vaccination campaigns. Therefore, the goal of this study was to estimate the prevalence and distribution of HPV types in the female population of the Canary Islands before introducing HPV vaccination, as well as to study the clinical and socio-demographic factors associated to HPV infection.

## 2. METHODS

## 2.1. Participants

The study was conducted between 2002 and 2007 on a sample of 18-65 years-old-women living in any of the two most populated Canarian Islands: Gran Canaria and Tenerife. Participants were randomly selected from the regional Health Administration databases, stratified and selected with a probability proportional to the different healthcare areas on both islands. Selected women were stratified into nine age groups (18-24, 25-29, 30-34, 35-39, 40-44, 45-49, 50-54, 55-59 and 60-65 years). The initial sample included 2,276 women. Subsequently, a group of women from Gran Canaria who requested to participate in the study were included (volunteers). Participants were contacted by letter and a subsequent telephone call. A visit to the nearest healthcare center was scheduled. This study was favorably evaluated by the Ethics and Clinical Trial Committee of our hospital.

## 2.2. Patient and Public Involvement

No patients or the public were involved in the design, or conduct, or dissemination of this study.

## 2.3. Procedures

Participants were asked to fulfill an informed consent form and to complete a clinical and epidemiological questionnaire (adapted from IARC surveys). A cervical sample was collected for cytological study and HPV detection. The cytological sample was obtained using the Papanicolau method. Cytological diagnosis was carried out by one pathologist using the Bethesda system. To detect HPV infection, two separated polymerase chain reactions (PCR) were conducted: one using My09/My11 consensus primer and the other using Gp5+/Gp6+ consensus primer. DNA quality was evaluated

1 by PCR testing for the  $\beta$ -globin gene. Samples that were negative for both HPV DNA  
2  
3  
4 and  $\beta$ -globin were excluded from the final analysis. Samples showing positive results  
5  
6 for any of the HPV PCR reactions or any cytological alteration (Atypical Squamous cells  
7  
8 of Undetermined Significance (ASCUS) or higher) were genotyped using the Linear  
9  
10 Array<sup>®</sup> HPV Genotyping Test (CE-IVD; Roche Diagnostics<sup>®</sup>) or the INNO-LIPA HPV  
11  
12 Genotyping Extra Amp kit (ImmunoGenetics<sup>®</sup>, Belgium - FUJIREBIO Europe, Belgium).  
13  
14  
15  
16  
17

#### 18 2.4. Statistical analyses

20 Descriptive analysis of socio-demographic variables was conducted, globally and  
21  
22 stratified according to the study subpopulation (i.e. selected participants from Gran  
23  
24 Canaria, volunteers from Gran Canaria, selected participants from Tenerife). Estimated  
25  
26 HPV infection prevalence and genotype distribution and corresponding 95%  
27  
28 confidence intervals (CI95%) were calculated as the number of HPV positive women  
29  
30 among the total number of women of women tested for each age group, study  
31  
32 subpopulation and cytological outcome (normal, abnormal). For each genotype,  
33  
34 estimated prevalences were calculated independently including the presence of a  
35  
36 given type either as a single type or in combination with others (multiple infections).  
37  
38 Multivariate analysis was conducted using basic and adjusted logistic regression  
39  
40 models in order to assess potential risk factors associated to infections by any HPV  
41  
42 type and by HR types. Variables were introduced one by one into a basic regression  
43  
44 model adjusted for age group and subpopulation. Variables showing statistically  
45  
46 significant association ( $p$ -value < 0.05) were kept as adjustment variables in the final  
47  
48 model. Statistical analysis was carried out with the R software (R Development Core  
49  
50 Team, 2005, <http://www.r-project.org>).  
51  
52  
53  
54  
55  
56  
57  
58  
59  
60

## RESULTS

### *Study population*

Table 1 shows the characteristics of the study population. A total of 6,091 women were included: 3,212 selected from the general Gran Canaria population (52.7%), 665 volunteers from Gran Canaria (10.9%) and 2,214 selected from Tenerife (36.3%). Up to 8.4% of participants were not born in Spain and came mostly from Latin American countries (5.4%); participants' mean age was 40.7 years; 64.4% were married at recruitment; 77.5% had been pregnant at least once and the mean number of children was 2.2. Regarding cytology screening, 53.7% of subjects had undergone more than 5 cytological studies in their lives, while 3.5% of them had never undergone one. Regarding HPV infection related epidemiological factors, 56.5% of subjects were non-smokers and 28.5% were smokers at recruitment; 53.9% of subjects had only one sexual partner; and 47.3% were younger than 19 years at sexual first intercourse. Demographic characteristics were slightly different between both islands (data not shown): education level, proportion of smokers and number of sexual partners were statistically higher in Tenerife than in Gran Canaria.

**Table 1 – Characteristics of the study participants (n=6,091 women).**

| Study sample characteristics      | N (%)        |
|-----------------------------------|--------------|
| <b>Distribution by population</b> |              |
| Gran Canaria (general population) | 3,212 (52.7) |
| Gran Canaria (volunteers)         | 665 (10.9)   |
| Tenerife                          | 2,214 (36.3) |
| <b>Country of birth</b>           |              |
| Spain                             | 5,397 (91.6) |
| Europe (excluding Spain)          | 111 (1.9)    |
| Northern Africa                   | 20 (0.3)     |
| Sub-Saharan Africa                | 15 (0.3)     |
| Latin America and Caribbean       | 318 (5.4)    |
| Asia and Oceania                  | 30 (0.5)     |
| Missing data                      | 200 (-)      |
| <b>Age distribution (years)</b>   |              |

|    |                                               |                              |              |
|----|-----------------------------------------------|------------------------------|--------------|
| 1  |                                               | 18-24                        | 572 (9.4)    |
| 2  |                                               | 25-29                        | 663 (10.9)   |
| 3  |                                               | 30-34                        | 905 (14.9)   |
| 4  |                                               | 35-39                        | 902 (14.8)   |
| 5  |                                               | 40-44                        | 793 (13.0)   |
| 6  |                                               | 45-49                        | 631 (10.4)   |
| 7  |                                               | 50-54                        | 613 (10.1)   |
| 8  |                                               | 55-59                        | 502 (8.2)    |
| 9  |                                               | 60-65                        | 510 (8.4)    |
| 10 |                                               |                              |              |
| 11 | <b>Marital status</b>                         |                              |              |
| 12 |                                               | Single                       | 1,396 (22.9) |
| 13 |                                               | Married/de facto partnership | 3,919 (64.4) |
| 14 |                                               | Divorced/separated           | 573 (9.4)    |
| 15 |                                               | Widowed                      | 195 (3.2)    |
| 16 |                                               | Missing data                 | 8 (-)        |
| 17 |                                               |                              |              |
| 18 | <b>Pregnancies</b>                            |                              |              |
| 19 |                                               | No                           | 1,343 (22.5) |
| 20 |                                               | Yes                          | 4,613 (77.5) |
| 21 |                                               | Missing data                 | 135 (-)      |
| 22 |                                               |                              |              |
| 23 | <b>Number of live births <sup>1</sup></b>     |                              |              |
| 24 |                                               | 0                            | 28 (0.7)     |
| 25 |                                               | 1                            | 1,237 (28.7) |
| 26 |                                               | 2                            | 1,786 (41.5) |
| 27 |                                               | 3                            | 789 (18.3)   |
| 28 |                                               | 4                            | 277 (6.4)    |
| 29 |                                               | ≥5                           | 186 (4.3)    |
| 30 |                                               | Missing data                 | 310 (-)      |
| 31 |                                               |                              |              |
| 32 | <b>Sexually transmitted disease</b>           |                              |              |
| 33 |                                               | Never                        | 5,882 (96.6) |
| 34 |                                               | Ever <sup>2</sup>            | 209 (3.4)    |
| 35 |                                               | Syphilis <sup>3</sup>        | 30 (0.5)     |
| 36 |                                               | Genital herpes <sup>3</sup>  | 51 (0.8)     |
| 37 |                                               | Gonorrhoea <sup>3</sup>      | 23 (0.4)     |
| 38 |                                               | HIV <sup>3</sup>             | 7 (0.1)      |
| 39 |                                               | Genital warts <sup>3</sup>   | 120 (2.0)    |
| 40 |                                               | Chlamydia <sup>3</sup>       | 30 (0.5)     |
| 41 |                                               | Genital ulcer <sup>3</sup>   | 16 (0.3)     |
| 42 |                                               | Others <sup>3</sup>          | 72 (1.2)     |
| 43 |                                               |                              |              |
| 44 | <b>Smoking status</b>                         |                              |              |
| 45 |                                               | Never smoked                 | 3,443 (56.5) |
| 46 |                                               | Ex smoker                    | 913 (15.0)   |
| 47 |                                               | Current smoker               | 1,735 (28.5) |
| 48 |                                               |                              |              |
| 49 | <b>Previous cervical pap smears</b>           |                              |              |
| 50 |                                               | None                         | 216 (3.5)    |
| 51 |                                               | 1                            | 493 (8.1)    |
| 52 |                                               | 2-3                          | 1,056 (17.3) |
| 53 |                                               | 4-5                          | 772 (12.7)   |
| 54 |                                               | >5                           | 3,273 (53.7) |
| 55 |                                               | Do not know                  | 281 (4.6)    |
| 56 |                                               |                              |              |
| 57 | <b>Previous cervical lesions <sup>4</sup></b> |                              |              |
| 58 |                                               | No                           | 4,837 (92.5) |
| 59 |                                               | Yes                          | 385 (7.4)    |
| 60 |                                               | Do not know                  | 5 (0.1)      |

|    |                                                |              |
|----|------------------------------------------------|--------------|
| 1  | Missing data                                   | 648 (-)      |
| 2  | <b>Age at first sexual intercourse (years)</b> |              |
| 3  | <15                                            | 187 (3.1)    |
| 4  | 15-16                                          | 828 (13.6)   |
| 5  | 17-18                                          | 1,863 (30.6) |
| 6  | 19-20                                          | 1,281 (21.0) |
| 7  | 21-25                                          | 1,421 (23.3) |
| 8  | >25                                            | 442 (7.3)    |
| 9  | Missing data                                   | 69 (-)       |
| 10 | <b>Lifetime number of sexual partners</b>      |              |
| 11 | 1                                              | 3,232 (53.9) |
| 12 | 2-3                                            | 1,571 (26.2) |
| 13 | 4-5                                            | 614 (10.2)   |
| 14 | 6-10                                           | 405 (6.8)    |
| 15 | 11-20                                          | 126 (2.1)    |
| 16 | >20                                            | 49 (0.8)     |
| 17 | Missing data                                   | 94 (-)       |
| 18 | <b>Contraceptive methods used<sup>5</sup></b>  |              |
| 19 | Oral contraceptives                            | 4,664 (76.6) |
| 20 | IUD                                            | 1,133 (18.6) |
| 21 | Condom                                         | 4,522 (74.2) |
| 22 | Rhythm method/coitus interruptus               | 3,049 (50.1) |
| 23 | Diaphragm/spermicide                           | 234 (3.8)    |
| 24 | Injection/implant                              | 253 (4.2)    |
| 25 | Tube ligation                                  | 802 (13.2)   |
| 26 | Vasectomy                                      | 549 (9.0)    |

<sup>1</sup> Among ever pregnant women (N=4,613). <sup>2</sup> Includes syphilis, genital herpes, gonorrhea, HIV (positive test), genital warts, Chlamydia, genital ulcer, others. <sup>3</sup> Do not add the total of women because a woman could have more than one sexually transmitted disease in lifetime. <sup>4</sup> Among women with a previous pap smear (N=5,875). <sup>5</sup> Do not add the total of women because a woman can use more than one contraceptive in lifetime.

### ***Prevalence of cervical HPV infection***

For the prevalence study, 6,010 women were included in the analysis after excluding 81 women due to poor DNA quality in their samples. The prevalence of any-type HPV infection was 13.6% (CI95% 12.8-14.5) while the prevalence of HR-HPV infection was 11.1% (CI95% 10.3-11.9). The youngest age group (18-24 years) showed the highest prevalence with 26.7% of any-type HPV infection (CI95% 23.1-30.4). Prevalence progressively decreased with increasing age, although the two oldest groups (55-65 years) showed a slightly non-significant increase compared with the immediately younger group (Table 2).

**Table 2 – Prevalence of Human Papillomavirus (HPV) by age group for any type and for any high-risk type (n=6,010 women).**

| Age group (years) | Number of tested women | Number of HPV positive women | Any HPV prevalence (%; 95% CI) | Any HR HPV prevalence <sup>1</sup> (%; 95% CI) |
|-------------------|------------------------|------------------------------|--------------------------------|------------------------------------------------|
| 18-24             | 565                    | 151                          | 26.7 (23.1-30.4)               | 23.9 (20.4-27.4)                               |
| 25-29             | 655                    | 145                          | 22.1 (19.0-25.3)               | 19.7 (16.6-22.7)                               |
| 30-34             | 894                    | 161                          | 18.0 (15.5-20.5)               | 15.2 (12.9-17.6)                               |
| 35-39             | 890                    | 96                           | 10.8 (8.7-12.8)                | 8.0 (6.2-9.8)                                  |
| 40-44             | 783                    | 79                           | 10.1 (8.0-12.2)                | 8.6 (6.6-10.5)                                 |
| 45-49             | 622                    | 59                           | 9.5 (7.2-11.8)                 | 7.1 (5.1-9.1)                                  |
| 50-54             | 607                    | 43                           | 7.1 (5.0-9.1)                  | 4.9 (3.2-6.7)                                  |
| 55-59             | 495                    | 42                           | 8.5 (6.0-10.9)                 | 5.5 (3.5-7.5)                                  |
| 60-65             | 499                    | 44                           | 8.8 (6.3-11.3)                 | 5.8 (3.8-7.9)                                  |
| <b>Total</b>      | <b>6,010</b>           | <b>820</b>                   | <b>13.6 (12.8-14.5)</b>        | <b>11.1 (10.3-11.9)</b>                        |

HPV: Human Papillomavirus; HR: High-Risk; CI: Confidence Interval.

<sup>1</sup> HR HPV types includes high-risk types and possibly /probably high-risk types: 16, 18, 31, 33, 35, 39, 45, 51, 52, 56, 58, 59, 53, 66, 67, 68, 69, 69/71, 70, 73.

Although volunteers from Gran Canaria showed higher prevalence of any-type HPV infection than participants from the general population from both Gran Canaria and Tenerife (14.5%, CI95% 11.8-17.2, versus 12.7%, CI95% 11.6-13.9; data not shown), the difference was not statistically significant. A comparison between the two populations from Gran Canaria (general population and volunteers) and the population from Tenerife showed statistically significant differences in HR-HPV infection prevalence (10.6%, CI95% 9.6-11.6, versus 12.1%, CI95% 10.7-13.4, p=0.002; data not shown).

Table 3 shows the distribution of the most frequent HPV genotypes. Single-type HPV infection was detected in 6% of subjects and multiple infections in 7.2% (corresponding to 43.8% and 52.8% of all HPV-positive women respectively). Among HR-HPV types, type 16 was the most frequent one found in 27.8% of positive women

(including both single and multiple HPV types), followed by types 51 (13.7%), 53 (13.3%), 59 (9.9%), 31 (8.5%), 52 (7.7%) and 18 (6.1%).

**Table 3 – Human Papillomavirus (HPV) type-specific distribution of the most common types (n=6,010 women).**

| HPV type                         | Number of HPV positive women (n=820) | HPV prevalence among all women (n=6,010) (%; 95% CI) | HPV prevalence among positive women (n=820) (%; 95% CI) |
|----------------------------------|--------------------------------------|------------------------------------------------------|---------------------------------------------------------|
| <b>Single types</b>              | <b>359</b>                           | <b>6.0 (5.4-6.6)</b>                                 | <b>43.8 (40.4-47.2)</b>                                 |
| <b>HR HPV types <sup>1</sup></b> |                                      |                                                      |                                                         |
| 16                               | 75                                   | 1.2 (1.0-1.5)                                        | 9.1 (7.2-11.1)                                          |
| 51                               | 34                                   | 0.6 (0.4-0.8)                                        | 4.1 (2.8-5.5)                                           |
| 53                               | 28                                   | 0.5 (0.3-0.6)                                        | 3.4 (2.2-4.7)                                           |
| 31                               | 16                                   | 0.3 (0.1-0.4)                                        | 2.0 (1.0-2.9)                                           |
| 59                               | 14                                   | 0.2 (0.1-0.4)                                        | 1.7 (0.8-2.6)                                           |
| 33, 68, 70                       | 11 each                              | 0.2 (0.1-0.3) <sup>4</sup>                           | 1.3 (0.6-2.1) <sup>4</sup>                              |
| 66                               | 10                                   | 0.2 (0.1-0.3)                                        | 1.2 (0.5-2.0)                                           |
| 52, 58                           | 9 each                               | 0.1 (0.1-0.2) <sup>4</sup>                           | 1.1 (0.4-1.8) <sup>4</sup>                              |
| 18                               | 8                                    | 0.1 (0.0-0.2)                                        | 1.0 (0.3-1.6)                                           |
| 56                               | 7                                    | 0.1 (0.0-0.2)                                        | 0.9 (0.2-1.5)                                           |
| 35, 39                           | 5 each                               | 0.1 (0.0-0.2) <sup>4</sup>                           | 0.6 (0.1-1.1) <sup>4</sup>                              |
| 73                               | 4                                    | 0.1 (0.0-0.1)                                        | 0.5 (0.0-1.0)                                           |
| 45                               | 3                                    | 0.0 (0.0-0.1)                                        | 0.4 (0.0-0.8)                                           |
| 67                               | 2                                    | 0.0 (0.0-0.1)                                        | 0.2 (0.1-0.6)                                           |
| 69, 69/71                        | 1 each                               | 0.0 (0.0-0.0) <sup>4</sup>                           | 0.1 (0.1-0.4) <sup>4</sup>                              |
| <b>LR HPV types <sup>2</sup></b> |                                      |                                                      |                                                         |
| 42                               | 17                                   | 0.3 (0.1-0.4)                                        | 2.1 (1.1-3.0)                                           |
| 84                               | 12                                   | 0.2 (0.1-0.3)                                        | 1.5 (0.6-2.3)                                           |
| 62                               | 11                                   | 0.2 (0.1-0.3)                                        | 1.3 (0.6-2.1)                                           |
| 61                               | 10                                   | 0.2 (0.1-0.3)                                        | 1.2 (0.5-2.0)                                           |
| 6, 55, 81                        | 9                                    | 0.1 (0.1-0.2)                                        | 1.1 (0.4-1.8)                                           |
| 89                               | 5                                    | 0.1 (0.0-0.2)                                        | 0.6 (0.1-1.1)                                           |
| 54                               | 4                                    | 0.1 (0.0-0.1)                                        | 0.5 (0.0-1.0)                                           |
| 11, 43, 72, 83                   | 2 each                               | 0.0 (0.0-0.1) <sup>4</sup>                           | 0.2 (0.1-0.6) <sup>4</sup>                              |
| 40                               | 1                                    | 0.0 (0.0-0.0)                                        | 0.1 (0.1-0.4)                                           |
| <b>Untyped HPV</b>               | <b>28</b>                            | <b>0.5 (0.3-0.6)</b>                                 | <b>3.4 (2.2-4.7)</b>                                    |
| <b>Multiple types</b>            | <b>433</b>                           | <b>7.2 (6.6-7.9)</b>                                 | <b>52.8 (49.4-56.2)</b>                                 |
| <b>Number of multiple types</b>  |                                      |                                                      |                                                         |
| 2 types                          | 203                                  | 3.4 (2.9-3.8)                                        | 24.8 (21.8-27.7)                                        |
| 3 types                          | 115                                  | 1.9 (1.6-2.3)                                        | 14.0 (11.6-16.4)                                        |
| 4 types                          | 73                                   | 1.2 (0.9-1.5)                                        | 8.9 (7.0-10.9)                                          |
| 5 or more types                  | 42                                   | 0.7 (0.5-0.9)                                        | 5.1 (3.6-6.6)                                           |



1  
2  
3  
4  
5  
6  
7  
8  
9  
10  
11  
12  
13  
14  
15  
16  
17  
18  
19  
20  
21  
22  
23  
24  
25  
26  
27  
28  
29  
30  
31  
32  
33  
34  
35  
36  
37  
38  
39  
40  
41  
42  
43  
44  
45  
46  
47  
48  
49  
50  
51  
52  
53  
54  
55  
56  
57  
58  
59  
60**Most frequent combinations**

|                   |     |               |                |
|-------------------|-----|---------------|----------------|
| 16 with others    | 153 | 2.5 (2.1-2.9) | 18.7 (16-21.3) |
| 53 with others    | 81  | 1.3 (1.1-1.6) | 9.9 (7.8-11.9) |
| 51 with others    | 78  | 1.3 (1.0-1.6) | 9.5 (7.5-11.5) |
| 59 with others    | 67  | 1.1 (0.8-1.4) | 8.2 (6.3-10.0) |
| 42 with others    | 59  | 1.0 (0.7-1.2) | 7.2 (5.4-9.0)  |
| 31 with others    | 54  | 0.9 (0.7-1.1) | 6.6 (4.9-8.3)  |
| 52 with others    | 54  | 0.9 (0.7-1.1) | 6.6 (4.9-8.3)  |
| 66 with others    | 50  | 0.8 (0.6-1.1) | 6.1 (4.5-7.7)  |
| 54 with others    | 48  | 0.8 (0.6-1.0) | 5.9 (4.2-7.5)  |
| 62 with others    | 46  | 0.8 (0.5-1.0) | 5.6 (4.0-7.2)  |
| 89 with others    | 46  | 0.8 (0.5-1.0) | 5.6 (4.0-7.2)  |
| 61 with others    | 44  | 0.7 (0.5-0.9) | 5.4 (3.8-6.9)  |
| 56 with others    | 43  | 0.7 (0.5-0.9) | 5.2 (3.7-6.8)  |
| 18 with others    | 42  | 0.7 (0.5-0.9) | 5.1 (3.6-6.6)  |
| 58 with others    | 42  | 0.7 (0.5-0.9) | 5.1 (3.6-6.6)  |
| 84 with others    | 38  | 0.6 (0.4-0.8) | 4.6 (3.2-6.1)  |
| 39 with others    | 37  | 0.6 (0.4-0.8) | 4.5 (3.1-5.9)  |
| 45 with others    | 34  | 0.6 (0.4-0.8) | 4.1 (2.8-5.5)  |
| 68 with others    | 32  | 0.5 (0.3-0.7) | 3.9 (2.6-5.2)  |
| 81 with others    | 28  | 0.5 (0.3-0.6) | 3.4 (2.2-4.7)  |
| 6 with others     | 25  | 0.4 (0.3-0.6) | 3.0 (1.9-4.2)  |
| 73 with others    | 23  | 0.4 (0.2-0.5) | 2.8 (1.7-3.9)  |
| 33 with others    | 20  | 0.3 (0.2-0.5) | 2.4 (1.4-3.5)  |
| 35 with others    | 19  | 0.3 (0.2-0.5) | 2.3 (1.3-3.3)  |
| 55 with others    | 18  | 0.3 (0.2-0.4) | 2.2 (1.2-3.2)  |
| 70 with others    | 15  | 0.2 (0.1-0.4) | 1.8 (0.9-2.7)  |
| 83 with others    | 15  | 0.2 (0.1-0.4) | 1.8 (0.9-2.7)  |
| 67 with others    | 13  | 0.2 (0.1-0.3) | 1.6 (0.7-2.4)  |
| 82 with others    | 13  | 0.2 (0.1-0.3) | 1.6 (0.7-2.4)  |
| 40 with others    | 10  | 0.2 (0.1-0.3) | 1.2 (0.5-2.0)  |
| 71 with others    | 9   | 0.1 (0.1-0.2) | 1.1 (0.4-1.8)  |
| 11 with others    | 8   | 0.1 (0.0-0.2) | 1.0 (0.3-1.6)  |
| 72 with others    | 8   | 0.1 (0.0-0.2) | 1.0 (0.3-1.6)  |
| 74 with others    | 6   | 0.1 (0.0-0.2) | 0.7 (0.1-1.3)  |
| 69 with others    | 5   | 0.1 (0.0-0.2) | 0.6 (0.1-1.1)  |
| 64 with others    | 2   | 0.0 (0.0-0.1) | 0.2 (0.0-0.6)  |
| 69/71 with others | 2   | 0.0 (0.0-0.1) | 0.2 (0.0-0.6)  |
| 43 with others    | 0   | 0.0 (0.0-0.0) | 0.0 (0.0-0.0)  |

**Combinations of vaccine types**

|                                        |     |               |                  |
|----------------------------------------|-----|---------------|------------------|
| 6/11 <sup>3</sup>                      | 43  | 0.7 (0.5-0.9) | 5.2 (3.7-6.8)    |
| 16/18 <sup>3</sup>                     | 261 | 4.3 (3.8-4.9) | 31.8 (28.6-35.0) |
| 6/11/16/18 <sup>3</sup>                | 297 | 4.9 (4.4-5.5) | 36.2 (32.9-39.5) |
| 6/11/16/18/31/33/45/52/58 <sup>3</sup> | 444 | 7.4 (6.7-8.0) | 54.1 (50.7-57.6) |

HPV: Human Papillomavirus; HR: High-Risk; LR: Low-Risk; CI: Confidence Interval.

1 <sup>1</sup> HR types includes high-risk types and possibly /probably high-risk types: 16, 18, 31, 33, 35, 39, 45, 51, 52, 56, 58,  
2 59, 53, 66, 67, 68, 69, 69/71, 70, 73. <sup>2</sup> LR types includes: 6, 11, 40, 42, 43, 54, 55, 61, 62, 72, 81, 83, 84, 89. <sup>3</sup> One or  
3 more of the vaccine types are concerned. <sup>4</sup> HPV prevalence for each of the types in the row.  
4  
5  
6  
7

8 Among LR-HPV types, type 42 was the most common one (9.3%). In an analysis  
9 combining the genotypes included in the HPV vaccines, 31.8% of HPV-positive women  
10 were infected by types 16 and/or 18 while the percentage increased to 36.2% when  
11 types 6 and/or 11 were added and to 54.1% when the nine types included in the 9-  
12 valent vaccine were considered. Figure 1 and Supplementary table 1 show the  
13 genotype distribution per age group.  
14  
15  
16  
17  
18  
19  
20  
21  
22  
23  
24

### 25 ***Cytopathological study and cervical HPV infection***

26 The cytological study yielded 317 pathological findings (5.3%) with 69.1% (CI95% 64.0-  
27 74.2) of HPV positivity versus 5,693 non-pathological cytologies (94.7%) with 10.6%  
28 (CI95% 9.8-11.4) of HPV positivity (supplementary table 2), 214 cases of ASCUS were  
29 detected (3.6%) with 60.7% of HPV positivity, 91 cases of low-grade squamous  
30 intraepithelial lesions (LSIL) (1.5%) with 86.8% of HPV positivity and 12 cases of high-  
31 grade squamous intraepithelial lesions or worse (HSIL+) (0.2%) with 83.3% of HPV  
32 positivity. Genotype 16 was the most frequently type found in these cytological  
33 alterations. Multiple infections were more frequent in women with LSIL or HSIL+ as  
34 compared with ASCUS (supplementary table 3).  
35  
36  
37  
38  
39  
40  
41  
42  
43  
44  
45  
46  
47  
48  
49  
50  
51

### 52 ***Cervical HPV infection and associated risk factors***

53 Considering all cases of cervical HPV infection (LR-HPV and HR-HPV) and according to  
54 the final adjusted model, the following statistically significant variables were detected  
55 in the association with HPV infection: younger ages (18-29 years, with a significant  
56  
57  
58  
59  
60

lineal trend), not married, smokers, more than one sexual partner (statistically significant trend), history of cervical alterations or genital warts, and practicing coitus interruptus (table 4). When only cases of HR-HPV cervical infection were considered, the same variables showed statistical significance except for practicing coitus interruptus (supplementary table 4).

**Table 4 – Crude and multivariate analyses of the association between cervical Human Papillomavirus (HPV) infection and selected subjects' characteristics (n=6,010 women).**

| Study sample characteristics          | Number of HPV positive women / number of HPV tested women | HPV prevalence (%) | Basic model <sup>1</sup> POR (95% CI) | Adjusted model <sup>2</sup> POR (95% CI) |
|---------------------------------------|-----------------------------------------------------------|--------------------|---------------------------------------|------------------------------------------|
| <b>Population</b>                     |                                                           |                    |                                       |                                          |
| Gran Canaria                          | 501 / 3,847                                               | 13.0               | 1.0 (ref)                             | 1.0 (ref)                                |
| Tenerife                              | 319 / 2,163                                               | 14.7               | 1.1 (0.98-1.3)                        | 1.0 (0.8-1.1)                            |
| <b>Country of birth</b>               |                                                           |                    |                                       |                                          |
| Spain                                 | 711 / 5,331                                               | 13.3               | 1.0 (ref)                             | 1.0 (ref)                                |
| Europe (excluding Spain)              | 17 / 109                                                  | 15.6               | 1.3 (0.8-2.2)                         | 0.8 (0.5-1.5)                            |
| Africa                                | 8 / 33                                                    | 24.2               | <b>2.7 (1.2-6.0)</b>                  | 2.3 (0.99-5.4)                           |
| Latin America and Caribbean           | 51 / 309                                                  | 16.5               | 1.3 (0.9-1.8)                         | 1.2 (0.8-1.7)                            |
| Asia and Oceania                      | 2 / 29                                                    | 6.9                | 0.6 (0.1-2.5)                         | 0.8 (0.2-3.5)                            |
| Missing data                          | 31 / 199                                                  | -                  | -                                     | -                                        |
| Outside Spain (include all countries) | 78 / 480                                                  | 16.3               | <b>1.3 (1.0-1.7)</b>                  | 1.1 (0.9-1.5)                            |
| <b>Age distribution (years)</b>       |                                                           |                    |                                       |                                          |
| 18-24                                 | 151 / 565                                                 | 26.7               | <b>3.8 (2.6-5.4)</b>                  | <b>2.1 (1.3-3.2)</b>                     |
| 25-29                                 | 145 / 655                                                 | 22.1               | <b>3.0 (2.1-4.2)</b>                  | <b>1.6 (1.0-2.4)</b>                     |
| 30-34                                 | 161 / 894                                                 | 18.0               | <b>2.3 (1.6-3.4)</b>                  | 1.3 (0.9-2.0)                            |
| 35-39                                 | 96 / 890                                                  | 10.8               | 1.3 (0.9-1.8)                         | 0.8 (0.5-1.2)                            |
| 40-44                                 | 79 / 783                                                  | 10.1               | 1.2 (0.8-1.7)                         | 0.8 (0.5-1.2)                            |
| 45-49                                 | 59 / 622                                                  | 9.5                | 1.1 (0.7-1.7)                         | 0.7 (0.5-1.1)                            |
| 50-54                                 | 43 / 607                                                  | 7.1                | 0.8 (0.5-1.2)                         | <b>0.6 (0.4-0.9)</b>                     |
| 55-59                                 | 42 / 495                                                  | 8.5                | 1.0 (0.6-1.5)                         | 0.8 (0.5-1.3)                            |
| 60-65                                 | 44 / 499                                                  | 8.8                | 1.0 (ref)                             | 1.0 (ref)                                |
|                                       | <i>p-value for trend</i>                                  |                    | <b><i>p&lt;0.001</i></b>              | <b><i>p&lt;0.001</i></b>                 |
| <b>Level of education</b>             |                                                           |                    |                                       |                                          |
| None / Preschool                      | 40 / 449                                                  | 8.9                | 1.0 (ref)                             | 1.0 (ref)                                |
| Primary                               | 307 / 2,649                                               | 11.6               | 1.0 (0.7-1.5)                         | 1.0 (0.7-1.4)                            |
| Secondary                             | 241 / 1,477                                               | 16.3               | 1.1 (0.8-1.6)                         | 0.9 (0.6-1.3)                            |
| University or higher                  | 213 / 1,331                                               | 16.0               | 1.2 (0.8-1.7)                         | 0.9 (0.6-1.4)                            |
| Others                                | 18 / 95                                                   | 18.9               | 1.2 (0.6-2.2)                         | 1.1 (0.5-2.0)                            |

|    |  |                                                |             |      |                          |                          |
|----|--|------------------------------------------------|-------------|------|--------------------------|--------------------------|
| 1  |  | Missing data                                   | 1 / 9       | -    | -                        | -                        |
| 2  |  |                                                |             |      | <i>p</i> =0.2            | <i>p</i> =0.5            |
| 3  |  | <i>p</i> -value for trend (excluding others)   |             |      |                          |                          |
| 4  |  | <b>Marital status</b>                          |             |      |                          |                          |
| 5  |  | Single                                         | 329 / 1,379 | 23.9 | <b>2.0 (1.6-2.4)</b>     | <b>1.5 (1.2-1.9)</b>     |
| 6  |  | Married/de facto partnership                   | 347 / 3,872 | 9.0  | 1.0 (ref)                | 1.0 (ref)                |
| 7  |  | Divorced/separated                             | 118 / 560   | 21.1 | <b>3.0 (2.4-3.8)</b>     | <b>1.8 (1.4-2.4)</b>     |
| 8  |  | Widowed                                        | 25 / 191    | 13.1 | <b>2.1 (1.3-3.2)</b>     | <b>1.7 (1.0-2.6)</b>     |
| 9  |  | Missing data                                   | 1 / 8       | -    | -                        | -                        |
| 10 |  | <b>Number of live births</b>                   |             |      |                          |                          |
| 11 |  | No <sup>3</sup>                                | 279 / 1,346 | 20.7 | 1.0 (ref)                | 1.0 (ref)                |
| 12 |  | 1                                              | 157 / 1,222 | 12.8 | <b>0.8 (0.6-0.9)</b>     | 0.8 (0.6-1.1)            |
| 13 |  | 2                                              | 171 / 1,760 | 9.7  | <b>0.7 (0.6-0.9)</b>     | 1.0 (0.7-1.3)            |
| 14 |  | 3                                              | 80 / 781    | 10.2 | 0.9 (0.6-1.2)            | 1.2 (0.8-1.7)            |
| 15 |  | ≥4                                             | 37 / 458    | 8.1  | 0.7 (0.5-1.1)            | 0.9 (0.6-1.4)            |
| 16 |  | Missing data                                   | 96 / 443    | -    | -                        | -                        |
| 17 |  | <b>Smoking status</b>                          |             |      |                          |                          |
| 18 |  | Never smoked                                   | 376 / 3,402 | 11.1 | 1.0 (ref)                | 1.0 (ref)                |
| 19 |  | Ex smoker                                      | 126 / 900   | 14.0 | <b>1.4 (1.1-1.7)</b>     | 1.2 (0.9-1.5)            |
| 20 |  | Current smoker                                 | 318 / 1,708 | 18.6 | <b>1.7 (1.5-2.1)</b>     | <b>1.2 (1.0-1.5)</b>     |
| 21 |  | <b>Age at first sexual intercourse (years)</b> |             |      |                          |                          |
| 22 |  | <15                                            | 40 / 184    | 21.7 | 1.5 (0.95-2.5)           | 0.7 (0.4-1.2)            |
| 23 |  | 15-16                                          | 166 / 817   | 20.3 | 1.4 (0.99-2.1)           | 0.8 (0.5-1.2)            |
| 24 |  | 17-18                                          | 273 / 1,835 | 14.9 | 1.1 (0.8-1.6)            | 0.7 (0.5-1.1)            |
| 25 |  | 19-20                                          | 143 / 1,266 | 11.3 | 0.9 (0.7-1.3)            | 0.7 (0.5-1.1)            |
| 26 |  | 21-25                                          | 146 / 1,402 | 10.4 | 1.0 (0.7-1.4)            | 0.9 (0.6-1.3)            |
| 27 |  | >25                                            | 45 / 437    | 10.3 | 1.0 (ref)                | 1.0 (ref)                |
| 28 |  | Missing data                                   | 7 / 69      | -    | -                        | -                        |
| 29 |  | <i>p</i> -value for trend                      |             |      | <b><i>p</i>=0.001</b>    | <b><i>p</i>=0.3</b>      |
| 30 |  | <b>Lifetime number of sexual partners</b>      |             |      |                          |                          |
| 31 |  | 1                                              | 214 / 3,189 | 6.7  | 1.0 (ref)                | 1.0 (ref)                |
| 32 |  | 2-3                                            | 274 / 1,545 | 17.7 | <b>2.7 (2.2-3.3)</b>     | <b>2.3 (1.9-2.8)</b>     |
| 33 |  | 4-5                                            | 141 / 613   | 23.0 | <b>3.6 (2.8-4.6)</b>     | <b>2.8 (2.2-3.6)</b>     |
| 34 |  | 6-10                                           | 119 / 395   | 30.1 | <b>5.3 (4.0-6.9)</b>     | <b>3.9 (2.9-5.2)</b>     |
| 35 |  | 11-20                                          | 41 / 126    | 32.5 | <b>5.9 (3.9-8.8)</b>     | <b>4.2 (2.8-6.5)</b>     |
| 36 |  | >20                                            | 18 / 49     | 36.7 | <b>8.1 (4.4-14.8)</b>    | <b>6.2 (3.3-11.5)</b>    |
| 37 |  | Missing data                                   | 13 / 93     | -    | -                        | -                        |
| 38 |  | <i>p</i> -value for trend                      |             |      | <b><i>p</i>&lt;0.001</b> | <b><i>p</i>&lt;0.001</b> |
| 39 |  | <b>Use of oral contraceptives</b>              |             |      |                          |                          |
| 40 |  | Never                                          | 164 / 1,404 | 11.7 | 1.0 (ref)                | 1.0 (ref)                |
| 41 |  | Ever                                           | 656 / 4,606 | 14.2 | <b>1.2 (1.0-1.5)</b>     | 1.1 (0.9-1.4)            |
| 42 |  | <b>Rhythm method/coitus interruptus</b>        |             |      |                          |                          |
| 43 |  | Never                                          | 381 / 2,998 | 12.7 | 1.0 (ref)                | 1.0 (ref)                |
| 44 |  | Ever                                           | 439 / 3,012 | 14.6 | <b>1.3 (1.1-1.5)</b>     | <b>1.2 (1.0-1.4)</b>     |
| 45 |  | <b>Previous cervical lesions</b>               |             |      |                          |                          |
| 46 |  | No                                             | 645 / 4,986 | 12.9 | 1.0 (ref)                | 1.0 (ref)                |
| 47 |  | Yes                                            | 84 / 378    | 22.2 | <b>2.1 (1.6-2.7)</b>     | <b>1.6 (1.2-2.1)</b>     |
| 48 |  | Missing data <sup>4</sup>                      | 91 / 646    | -    | -                        | -                        |
| 49 |  | <b>Genital warts</b>                           |             |      |                          |                          |
| 50 |  | Never                                          | 783 / 5,894 | 13.3 | 1.0 (ref)                | 1.0 (ref)                |
| 51 |  | Ever                                           | 37 / 116    | 31.9 | <b>2.8 (1.8-4.2)</b>     | <b>1.7 (1.1-2.6)</b>     |

1 <sup>1</sup> Basic model: adjusted for age group (18-24, 25-34, 35-44, 45-54, 55-65) and population (Gran Canaria, Tenerife). <sup>2</sup>  
2 Adjusted model: adjusted for age group, population, level of education, marital status, smoking habits, lifetime  
3 number of sexual partners, previous cervical lesions, ever use of rhythm method, and ever had genital warts. <sup>3</sup>  
4 Includes women who were pregnant but had 0 live births. <sup>4</sup> Includes "Do not know" in the "Missing data" category. <sup>5</sup>  
5 Includes syphilis, genital herpes, gonorrhoea, HIV (positive test), genital warts, Chlamydia, genital ulcer, others. <sup>6</sup>  
6 Excludes ever had genital warts in the adjustment.  
7  
8  
9  
10  
11

## 12 **DISCUSSION**

### 13 ***Prevalence of cervical HPV infection***

14  
15 The prevalence of cervical HPV infection (LR-HPV and HR-HPV) in the whole studied  
16 population was 13.6% and 11.1% for HR-HPV. HPV prevalence in Spain reported in  
17 other published studies ranges from 2.7% to 17.5%.<sup>9-15</sup> Two published studies were  
18 population-based: one by de Sanjosé et al.<sup>10</sup> (2003) with a random sample of 973  
19 women from the metropolitan area of Barcelona reporting an HPV prevalence of 3.4%  
20 (CI95% 2.3-4.5), which is rather lower than ours, and one by García et al.<sup>15</sup> (2017)  
21 conducted in Castilla y León and reporting 9.6% of HPV prevalence, closer to ours.  
22 Differences between both studies could be explained by changes in sexual behavior in  
23 the Spanish population in recent years, with lower age at first sexual intercourse and  
24 more sexual partners.<sup>16</sup>  
25  
26  
27  
28  
29  
30  
31  
32  
33  
34  
35  
36  
37  
38  
39  
40  
41  
42  
43

44 Non population-based studies include CLEOPATRE<sup>9</sup>, a study conducted in 17  
45 Autonomous Communities in Spain, using the HC2 test and reporting 14.3% (CI95%  
46 13.1-15.5) of HPV prevalence and 12.2% (CI95% 11.1-13.4) of HR-HPV infection, both  
47 results were similar to ours.  
48  
49  
50  
51  
52

53 Studies conducted in other European countries reported varied results, with diverse  
54 populations and different HPV testing methods. In a review of 18 European studies  
55 conducted in 14 countries using the HPV-test as first screening (HC2 or PCR) the HR-  
56  
57  
58  
59  
60

1 HPV prevalence, standardized by age, ranged from 1.7% in Spain to 12.5% in  
2  
3 Belgium.<sup>17</sup> Bruni et al. (2010) in a meta-analysis including one million women  
4  
5 worldwide with normal cytological findings observed 8.8% global adjusted HPV  
6  
7 prevalence in Southern Europe, 9% in Western Europe and 10% in Northern Europe.<sup>18</sup>  
8  
9 Studies conducted among women from different European screening programs  
10  
11 showed HPV prevalences ranging from 6.4% in Germany<sup>19</sup>, 8.8% in Italy<sup>20</sup>, 13.7% in  
12  
13 France<sup>21</sup>, 15.2% in Belgium<sup>22</sup>, 19.4% in Portugal<sup>23</sup> to 26.4% in a population-based study  
14  
15 in Denmark.<sup>24</sup>

### ***Prevalence of cervical HPV infection per age group***

25 As expected, the highest HPV prevalence found in our study was observed in women  
26  
27 aged 18-24 years (26.7%), an age group potentially associated with a higher number of  
28  
29 sexual partners. This finding was also observed in previous Spanish and European  
30  
31 studies. In our study, after this first peak in women less than 25 years, the prevalence  
32  
33 declines in older ages, although a slightly, not significant, increased was observed in  
34  
35 women older than 55 years. This second peak in older women was also reported by  
36  
37 other authors.<sup>17,18,20,21,22</sup> Such a bimodal pattern could be due to changes in the sexual  
38  
39 behavior or the reactivation of latent viral infections<sup>25</sup>, HPV types and their variants in  
40  
41 such infections, individual susceptibility or regional differences in the screening  
42  
43 programs.<sup>18</sup>

### ***HPV genotypes***

54 HPV 16 was the most prevalent genotype in our population, present in 27.8% of  
55  
56 positive samples. This prevalence was similar to that reported in other studies in  
57  
58 Spain,<sup>10,14</sup> though higher than the 16.9% found in the CLEOPATRE study.<sup>9</sup> After HPV 16,  
59  
60

1 the most frequent types in decreasing order were: HPV 51, 53, 59, 31 and 52. Our  
2  
3  
4 results are similar to most studies conducted in Spain<sup>9,10,11,14</sup> and other European  
5  
6 countries.<sup>19,21,22,23,24</sup>  
7

8 Many studies have reported the percentage of multiple infections<sup>9,12,13,15,18,19,20,21,23,24</sup>  
9  
10 ranging from 8.1% in Spain<sup>13</sup> to 54.3% in Denmark.<sup>24</sup> The one from Denmark was  
11  
12 similar to ours (52.8%) although it included a higher percentage of infections by more  
13  
14 HPV types. This finding could be explained by the use of a HPV detection technique  
15  
16 (hybridization technology) with a high sensitivity for detecting multiple infections.  
17  
18

19  
20 A total of 31.8% of HPV positive women (4.3% of the total population) were infected  
21  
22 by types 16 and/or 18, which were included in the bivalent vaccine. Regarding HPV  
23  
24 types included in the quadrivalent vaccine (HPV 6, 11, 16 and 18), at least one of them  
25  
26 was found in 36.2% of women (4.9% of the total population). This prevalence  
27  
28 increased up to 54.1% with the addition of HPV types 31/33/45/52/58, included in the  
29  
30 nonavalent vaccine. Such proportions were higher than those reported in Denmark<sup>24</sup>  
31  
32 (27.7%) and in the CLEOPATRE study (22.1% in Spain<sup>9</sup> and 32.6% in Portugal<sup>23</sup>). These  
33  
34 data illustrate the degree of protection offered by HPV vaccines; 1 out of 3 HPV  
35  
36 infected women would have been protected by the bivalent or the quadrivalent  
37  
38 vaccine and 1 out of 2 women would have been protected by the nonavalent one.  
39  
40  
41  
42  
43  
44  
45  
46  
47

#### 48 ***Cytopathological study and cervical HPV infection***

49

50 Cytological alterations found in our study (5.3%) were similar to those observed in  
51  
52 other studies, both in Spain<sup>9,10,14</sup> and Europe<sup>19,20,22,23,24</sup>, ranging between 1.6% and 7%.  
53  
54 The HPV prevalence increased with lesion severity (60.7% in women with ASCUS;  
55  
56 86.8% in women with LSIL and 83.3% in women with HSIL+). This finding was in  
57  
58 agreement with other published studies.<sup>9,10,12,19,21,22,23,24</sup> The HPV prevalence in normal  
59  
60

1 cytologies was 10.6%, similar to that reported by Bruni et al.<sup>18</sup> in our geographical area  
2  
3 (8.8%), though lower than that reported in most studies.<sup>9,21,22,23,24</sup>  
4  
5  
6  
7

### 8 ***Risk factors and cervical HPV infection***

9  
10  
11 **Age** consistently appears as a risk factor for HPV infection, both in our study and other  
12  
13 published ones<sup>14,20,26,27</sup>, directly associated with younger women's sexual behavior as  
14  
15 compared to older ones.  
16

17  
18 **Number of sexual partners** in life extensively appears<sup>10,11,14,26,27,28</sup> as a risk factor for  
19  
20 HPV infection and was the factor with the largest impact in our study. As in our study,  
21  
22 most authors failed to find a relationship with **age at first intercourse**.<sup>10,26,27</sup> This later  
23  
24 parameter seems to influence number of sexual partners but does not seem to be an  
25  
26 independent risk factor for HPV infection.  
27  
28

29  
30 In our analysis, not being **married** (divorced, widow or single) was a statistically  
31  
32 significant risk factor for HPV infection, as was also reported in other studies.<sup>10,20,26</sup>  
33  
34 This finding could be explained by the sexual behavior of not married women, who  
35  
36 may probably have more sexual partners.  
37  
38

39  
40 **Coitus interruptus** was the only contraception related practice found to be associated  
41  
42 to higher risk of any-type HPV infection, both in the basic and the adjusted models,  
43  
44 although such an association was not found for HR-HPV types. This factor might  
45  
46 possibly be linked to younger groups, where other risk increasing factors coexist.  
47  
48

49  
50 **Smoking** was a risk factor for HPV infection in our population, in accordance with data  
51  
52 reported by other authors<sup>26,27,29</sup> though not by others.<sup>10</sup> Quitting smoking has been  
53  
54 considered to potentially revert infection risk.<sup>29</sup> In order to explain for the relationship  
55  
56 between smoking and increased risk of HPV infection, it has been postulated that  
57  
58 tobacco and its metabolites may alter the immune system of the cervical epithelium,  
59  
60



1 thus reducing the number of CD4 lymphocytes and Langerhans cells<sup>29</sup> and impairing  
2  
3  
4 the activity of natural killer cells.  
5

6 The presence of **genital warts and previous cervical alterations** was associated with  
7  
8 higher risk in our population, as well as in other studies<sup>26</sup>, which is not surprising since  
9  
10 both events are directly related.  
11

12  
13 **Country of origin**, especially African ones, appeared as a risk factor for HPV infection in  
14  
15 our basic model, though not in our adjusted model. Earlier published Spanish studies  
16  
17 showed higher HPV infection risk in women born out of Spain<sup>10,11,26</sup>, probably due to  
18  
19 differences in the sexual behavior of men and women.  
20  
21

22  
23 Regarding **parity** and HPV infection risk, similarly to other authors<sup>20</sup>, we found some  
24  
25 protective effect in women with one or two births in our basic model for any-type HPV,  
26  
27 though not for the adjusted model or for HR-HPV types, a finding also reported by  
28  
29 some authors.<sup>10,26,27</sup> In a meta-analysis published by the IARC<sup>30</sup> a slight risk increase in  
30  
31 nulliparous women (younger and more sexually active) as compared with women who  
32  
33 have been pregnant was described.  
34  
35  
36

37  
38 The relationship between **taking oral contraceptives (OC)** and the risk of HPV infection  
39  
40 is controversial. In our population, a slightly increased risk was found for women taking  
41  
42 OC in the basic model though not in the adjusted model, a finding also described in  
43  
44 other studies.<sup>10,20,26,27,30</sup>  
45  
46

47  
48 Infection by other **sexually transmitted diseases** analyzed in our population increased  
49  
50 the risk in the basic model but not in the adjusted model (data not shown), consistent  
51  
52 with other published studies.<sup>26,27</sup>  
53

54  
55 Some authors have reported no association between using condoms and increased risk  
56  
57 of HPV infection,<sup>14,20,27,28</sup> some even reported some protective effect.<sup>26</sup> In our study,  
58  
59  
60

1 like with other contraceptive methods, we failed to find an association with HPV  
2 infection (data not shown).  
3  
4  
5  
6  
7

### 8 ***Strengths and weaknesses***

10 One of the main strengths of our study was our population-based design, which  
11 covered the main healthcare centers on the islands and recruited potential  
12 participants from an official source, ensuring a random sample. Additionally, the fact  
13 that all cytological and molecular studies were conducted in the same laboratory, by  
14 the same technical and medical staff, using highly-sensitive and partially automated  
15 analytic systems ensured consistency, homogeneity and reproducibility of diagnostic  
16 methods.  
17  
18  
19  
20  
21  
22  
23  
24  
25  
26

27 The prolonged recruitment time was a weakness of this study. Three years were  
28 needed for Tenerife and six years for Gran Canaria, although two years had been  
29 originally planned. Potential variations over time could have influenced the socio-  
30 demographic characteristics of the population. Thus, the characteristics of participants  
31 recruited at the beginning of the recruitment period could have been different from  
32 those of women recruited by the end.  
33  
34  
35  
36  
37  
38  
39  
40  
41  
42  
43  
44

### 45 **Conclusions**

46 This study provides population-based references for the prevalence of HPV infection in  
47 the Canary Islands, which enables future assessment of the impact of HPV vaccination  
48 campaigns. The prevalence of HPV infection in the female population of Gran Canaria  
49 and Tenerife was high, although similar to that of previous studies conducted in Spain,  
50 with genotype HPV 16 being the most frequent one. These results support the  
51  
52  
53  
54  
55  
56  
57  
58  
59  
60

1 potential benefits of HPV vaccines in terms of reducing infection as well as the  
2  
3  
4 consequent development of HPV-related lesions, including cancer.  
5  
6  
7  
8  
9

## 10 11 **ACKNOWLEDGEMENTS**

12  
13 We would like to acknowledge all patients for their participation in the study. We  
14  
15 would also like to thank our colleagues and the study staff for their commitment to  
16  
17 data collection. We are very grateful to Tenesoya Alamo, Tanausú de la Cruz and Maria  
18  
19 Dolores Navarro for technical assistance. We have received donations of analytical kits  
20  
21 from Sanofi Pasteur MSD (Merck Sharp & Dome Corp.), Roche Diagnostics® SL and  
22  
23 Fujirebio® Ibérica SL.  
24  
25  
26  
27  
28  
29

30  
31 **COMPETING INTERESTS:** None declared.  
32  
33  
34

## 35 36 **FUNDING**

37  
38 This research has been funded by: Fondo de Investigación Sanitaria (Instituto de Salud  
39  
40 Carlos III), grant FIS 00/714; Fundación Canaria de Investigación y Salud, grant FUNCIS  
41  
42 00/14 and FUNCIS 02/19. Funders had no involvement in the study design, collection,  
43  
44 analysis, interpretation of the data, writing of the report nor in the decision to submit  
45  
46 the paper for publication.  
47  
48  
49  
50  
51

## 52 53 **CONTRIBUTORSHIP STATEMENT**

54  
55 MA designed the study, performed HPV diagnostic molecular methods, data analysis,  
56  
57 interpretation of data, and drafted the manuscript. ER performed statistical analysis of  
58  
59 data, designed the figures and drafted the manuscript. MP performed cytopathological  
60

1 diagnosis. MS performed HPV diagnostic molecular methods. MAS designed and  
2 supervised a base data and processed the experimental data. AT, BV, LA, RH, HPV  
3  
4 Canary Study Group received the patients and took cervical samples. MCC and ARdP  
5  
6 were involved in planning and supervised the management of cervical a molecular  
7  
8 samples. AL, JLT, OA, VB, NM, SC, AQ treated patients with cytological and molecular  
9  
10 disorders. LB, SS and ES aided in interpreting the results and worked on the  
11  
12 manuscript. All authors read and approved the final manuscript.  
13  
14  
15  
16  
17  
18  
19  
20  
21

## 22 DATA SHARING

23  
24 The database obtained from this study is kept under the supervision of the authors  
25  
26 (Andujar M & Fornell R) in an anonymized form. This data will be shared in a raw form  
27  
28 by emailing to [mandsan@gobiernodecanarias.org](mailto:mandsan@gobiernodecanarias.org).  
29  
30  
31  
32  
33  
34

## 35 REFERENCES

- 36  
37  
38  
39 1. Ferlay J, Ervik M, Lam F, et al. (2018). Global Cancer Observatory: Cancer Today. Lyon,  
40  
41 France: International Agency for Research on Cancer. Available from:  
42  
43 <https://gco.iarc.fr/today> [accessed September, 2, 2019].  
44  
45  
46 2. Health Service, Government of Canary Islands. Available from:  
47  
48 <http://www3.gobiernodecanarias.org/sanidad/scs> [accessed September 2, 2019].  
49  
50  
51 3. Bray F, Colombet M, Mery L, Piñeros M, et al, editors (2017) Cancer Incidence in Five  
52  
53 Continents, Vol. XI (electronic version). Lyon: International Agency for Research on  
54  
55 Cancer. Available from: <http://ci5.iarc.fr> [accessed September 2, 2019].  
56  
57  
58  
59  
60

- 1 4. Bosch FX, Lorincz A, Munoz N, Meijer CJ, Shah KV. The causal relation between human  
2 papillomavirus and cervical cancer. *J Clin Pathol* 2002;55:244-65.
- 3  
4  
5  
6 5. Muñoz N, Bosch FX, de Sanjosé S, et al. Epidemiologic classification of human  
7 papillomavirus types associated with cervical cancer. *N Engl J Med* 2003;348:518-27.
- 8  
9  
10  
11 6. de Sanjose S, Quint WG, Alemany L, et al. Human papillomavirus genotype attribution  
12 in invasive cervical cancer: a retrospective cross-sectional worldwide study. *Lancet*  
13  
14  
15  
16  
17  
18  
19 7. Schiller JT, Castellsagué X, Garland SM. A review of clinical trials of human  
20 papillomavirus prophylactic vaccines. *Vaccine* 2012;30 Suppl 5:F123-38.
- 21  
22  
23  
24 8. Joura EA, Giuliano AR, Iversen OE, et al. A 9-valent HPV vaccine against infection and  
25 intraepithelial neoplasia in women. *N Engl J Med* 2015;372:711-23.
- 26  
27  
28  
29 9. Castellsagué X, Iftner T, Roura E, et al. Prevalence and genotype distribution of human  
30 papillomavirus infection of the cervix in Spain: The CLEOPATRE Study. *J Med Virol*  
31  
32  
33  
34  
35  
36 10. de Sanjose S, Almirall R, Lloveras B, et al. Cervical human papillomavirus infection in  
37 the female population in Barcelona, Spain. *Sex Transm Dis* 2003;30:788-93.
- 38  
39  
40  
41 11. González C, Ortiz M, Canals J, et al. Higher prevalence of Human Papillomavirus  
42 infection in migrant women from Latin America in Spain. *Sex Transm Infect*  
43  
44  
45  
46  
47  
48 12. Bernal M, Burillo I, Mayordomo JI, Moros M, Benito R, Gil J. Human Papillomavirus  
49 (HPV) infection and intraepithelial neoplasia and invasive cancer of the uterine cervix:  
50 a case-control study in Zaragoza, Spain. *Infect Agent Cancer* 2008;3:8.
- 51  
52  
53  
54  
55  
56 13. Martorell M, García-García JA, Ortiz C, et al. Prevalence and distribution of human  
57 papillomavirus findings in swab specimens from gynaecology clinics of the east coast of  
58 Spain. *Scand J Infect Dis* 2010;42:549-53.
- 59  
60

- 1  
2  
3  
4  
5  
6  
7  
8  
9  
10  
11  
12  
13  
14  
15  
16  
17  
18  
19  
20  
21  
22  
23  
24  
25  
26  
27  
28  
29  
30  
31  
32  
33  
34  
35  
36  
37  
38  
39  
40  
41  
42  
43  
44  
45  
46  
47  
48  
49  
50  
51  
52  
53  
54  
55  
56  
57  
58  
59  
60
14. Trigo-Daporta M, García-Campello M, Pérez-Ríos M,. High-risk human papillomavirus in Galicia, Spain: prevalence and evaluation of the sample representativeness. *Scand J Infect Dis* 2014;46:737-44.
15. García S, Dominguez-Gil M, Gayete J, et al. [Prevalence of human papillomavirus in Spanish women from a population screening program]. *Rev Esp Quimioter* 2017;30:177-82.
16. de Sanjosé S, Cortés X, Méndez C, et al. Age at sexual initiation and number of sexual partners in the female Spanish population: Results from the AFRODITA survey. *Eur J Obstet Gynecol Reprod Biol* 2008;140:234–40.
17. de Vuyst H, Clifford G, Li N, Franceschi S. HPV infection in Europe. *Eur J Cancer* 2009;45:2632-9.
18. Bruni L, Diaz M, Castellsagué X, Ferrer E, Bosch FX, de Sanjosé S. Cervical human papillomavirus prevalence in 5 continents: Meta-analysis of 1 million women with normal cytological findings. *J Infect Dis* 2010;202:1789–99.
19. Klug SJ, Hukelmann M, Hollwitz B, et al. Prevalence of human papillomavirus types in women screened by cytology in Germany. *J Med Virol* 2007;79:616-25.
20. Ronco G, Ghisetti V, Segnan N, et al. Prevalence of human papillomavirus infection in women in Turin, Italy. *Eur J Cancer* 2005;41:297-305.
21. Heard I, Tondeur L, Arowas L, Falguieres m, Demazoin MC, Favre M. Human papillomavirus types distribution in organized cervical cancer screening in France. *PLoS One* 2013;8:e79372.
22. Arbyn M, Benoy I, Simoens C, Bogers J, Beutels P, Depuydt C. Prevaccination distribution of human papillomavirus types in women attending at cervical cancer screening in Belgium. *Cancer Epidemiol Biomarkers Prev* 2009;18:321-30.

- 1  
2  
3  
4  
5  
6  
7  
8  
9  
10  
11  
12  
13  
14  
15  
16  
17  
18  
19  
20  
21  
22  
23  
24  
25  
26  
27  
28  
29  
30  
31  
32  
33  
34  
35  
36  
37  
38  
39  
40  
41  
42  
43  
44  
45  
46  
47  
48  
49  
50  
51  
52  
53  
54  
55  
56  
57  
58  
59  
60
23. Pista A, Freire de Oliveira C, Cunha MJ, Paixao MT, Real O. Prevalence of Human Papillomavirus Infection in Women in Portugal. The CLEOPATRE Portugal Study. *Int J Gynecol Cancer* 2011;21:1150-8.
24. Kjaer S, Breugelmans G, Munk C, Junge J, Watson M, Iftner T. Population-based prevalence, type- and age-specific distribution of HPV in women before introduction of an HPV-vaccination program in Denmark. *Int J Cancer* 2008;123:1864-70.
25. Gravitt PE, Rositch AF, Silver MI, et al. A cohort effect of the sexual revolution may be masking an increase in human papillomavirus detection at menopause in the United States. *J Infect Dis* 2013;207:272-80.
26. Roura E, Iftner T, Vidart JA, et al. Predictors of human papillomavirus infection in women undergoing routine cervical cancer screening in Spain: the CLEOPATRE study. *BMC Infect Dis* 2012;12:145.
27. Pista A, de Oliveira CF, Cunha MJ, Paixao MT, Real O; CLEOPATRE Portugal Study Group. Risk factors for human papillomavirus infection among women in Portugal: the CLEOPATRE Portugal Study. *Int J Gynaecol Obstet* 2012;118:112-6.
28. Vaccarella S, Franceschi S, Herrero R, et al. Sexual behavior, condom use, and human papillomavirus: pooled analysis of the IARC human papillomavirus prevalence surveys. *Cancer Epidemiol Biomarkers Prev* 2006;15:326-33.
29. Vaccarella S, Herrero R, Snijders PJ, et al. Smoking and human papillomavirus infection: pooled analysis of the International Agency for Research on Cancer HPV Prevalence Surveys. *Int J Epidemiol* 2008;37:536-46.
30. Vaccarella S, Herrero R, Dai M, et al. Reproductive factors, oral contraceptive use, and human papillomavirus infection: pooled analysis of the IARC HPV prevalence surveys. *Cancer Epidemiol Biomarkers Prev* 2006;15:2148-53.

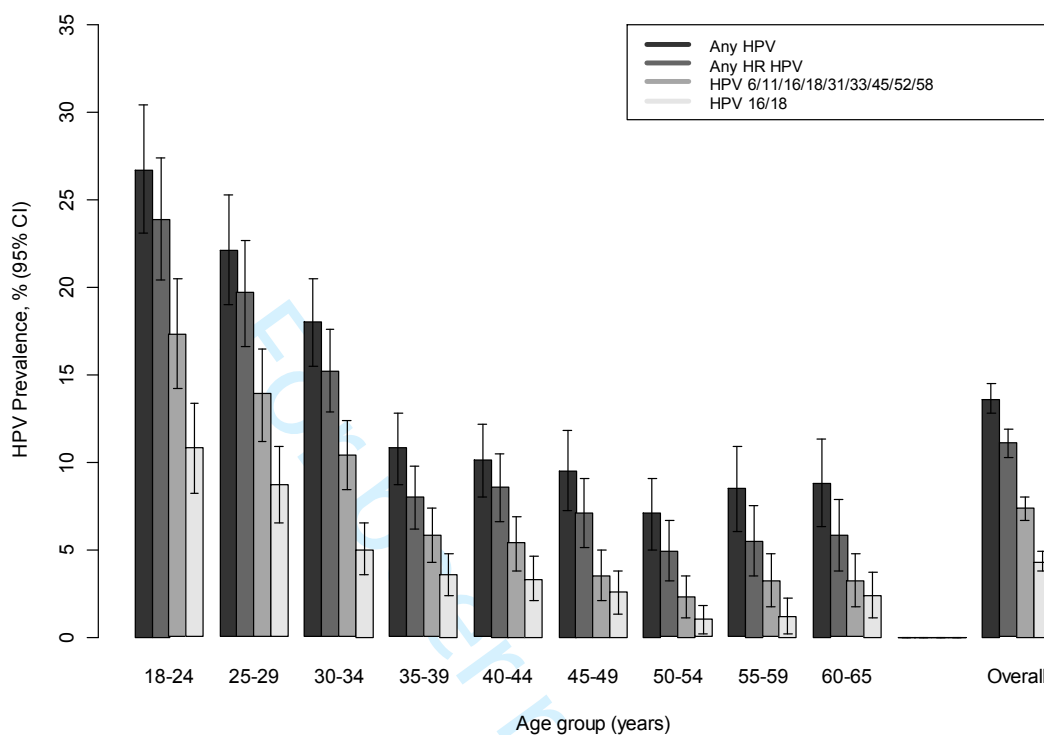

HPV: Human Papillomavirus; HR: High-Risk; CI: Confidence Interval.



## OTHER TABLES:

**Supplementary table 1 – Overall prevalence and age-specific prevalence of cervical HPV infections by any HPV type, any hr HPV type, HPV types 6/11/16/18/31/33/45/52/58 and HPV types 16/18 (n=6,010 women).**

| Age group (years) | Any HPV prevalence (%; 95% CI) | Any HR HPV prevalence <sup>1</sup> (%; 95% CI) | Prevalence of HPV 6/11/16/18/31/33/45/52/58 (%; 95% CI) | Prevalence of HPV 16/18/ (%; 95% CI) |
|-------------------|--------------------------------|------------------------------------------------|---------------------------------------------------------|--------------------------------------|
| 18-24             | 26.7 (23.1-30.4)               | 23.9 (20.4-27.4)                               | 17.3 (14.2-20.5)                                        | 10.8 (8.2-13.4)                      |
| 25-29             | 22.1 (19.0-25.3)               | 19.7 (16.6-22.7)                               | 13.9 (11.2-16.5)                                        | 8.7 (6.5-10.9)                       |
| 30-34             | 18.0 (15.5-20.5)               | 15.2 (12.9-17.6)                               | 10.4 (8.4-12.4)                                         | 5.0 (3.6-6.5)                        |
| 35-39             | 10.8 (8.7-12.8)                | 8.0 (6.2-9.8)                                  | 5.8 (4.3-7.4)                                           | 3.6 (2.4-4.8)                        |
| 40-44             | 10.1 (8.0-12.2)                | 8.6 (6.6-10.5)                                 | 5.4 (3.8-6.9)                                           | 3.3 (2.1-4.6)                        |
| 45-49             | 9.5 (7.2-11.8)                 | 7.1 (5.1-9.1)                                  | 3.5 (2.1-5.0)                                           | 2.6 (1.3-3.8)                        |
| 50-54             | 7.1 (5.0-9.1)                  | 4.9 (3.2-6.7)                                  | 2.3 (1.1-3.5)                                           | 1.0 (0.2-1.8)                        |
| 55-59             | 8.5 (6.0-10.9)                 | 5.5 (3.5-7.5)                                  | 3.2 (1.7-4.8)                                           | 1.2 (0.2-2.2)                        |
| 60-65             | 8.8 (6.3-11.3)                 | 5.8 (3.8-7.9)                                  | 3.2 (1.7-4.8)                                           | 2.4 (1.1-3.7)                        |
| <b>Total</b>      | <b>13.6 (12.8-14.5)</b>        | <b>11.1 (10.3-11.9)</b>                        | <b>7.4 (6.7-8.0)</b>                                    | <b>4.3 (3.8-4.9)</b>                 |

HPV: Human Papillomavirus; HR: High-Risk; CI: Confidence Interval.

<sup>1</sup> HR HPV types includes high-risk types and possibly /probably high-risk types: 16, 18, 31, 33, 35, 39, 45, 51, 52, 56, 58, 59, 53, 66, 67, 68, 69, 69/71, 70, 73.

Supplementary table 2 – Human Papillomavirus (HPV) type-specific distribution of the most common types (n=6,010 women) by cytology result.

| HPV type                         | NORMAL CYTOLOGY (n=5,693)    |                                            |                                                 | ABNORMAL CYTOLOGY (n=317)    |                                            |                                                 |
|----------------------------------|------------------------------|--------------------------------------------|-------------------------------------------------|------------------------------|--------------------------------------------|-------------------------------------------------|
|                                  | Number of HPV positive women | HPV prevalence among all women (%; 95% CI) | HPV prevalence among positive women (%; 95% CI) | Number of HPV positive women | HPV prevalence among all women (%; 95% CI) | HPV prevalence among positive women (%; 95% CI) |
| <b>Any HPV types</b>             | <b>601</b>                   | <b>10.6 (9.8-11.4)</b>                     | <b>-</b>                                        | <b>219</b>                   | <b>69.1 (64.0-74.2)</b>                    | <b>-</b>                                        |
| <b>Single types</b>              | <b>260</b>                   | <b>4.6 (4.0-5.1)</b>                       | <b>43.3 (39.3-47.2)</b>                         | <b>99</b>                    | <b>31.2 (26.1-36.3)</b>                    | <b>45.2 (38.6-51.8)</b>                         |
| <i>HR HPV types</i> <sup>1</sup> |                              |                                            |                                                 |                              |                                            |                                                 |
| 16                               | 56                           | 1.0 (0.7-1.2)                              | 9.3 (7.0-11.6)                                  | 19                           | 6.0 (3.4-8.6)                              | 8.7 (4.9-12.4)                                  |
| 51                               | 22                           | 0.4 (0.2-0.5)                              | 3.7 (2.2-5.2)                                   | 12                           | 3.8 (1.7-5.9)                              | 5.5 (2.5-8.5)                                   |
| 53                               | 21                           | 0.4 (0.2-0.5)                              | 3.5 (2.0-5.0)                                   | 7                            | 2.2 (0.6-3.8)                              | 3.2 (0.9-5.5)                                   |
| 31                               | 14                           | 0.2 (0.1-0.4)                              | 2.3 (1.1-3.5)                                   | 2                            | 0.6 (0.2-1.5)                              | 0.9 (0.3-2.2)                                   |
| 59                               | 8                            | 0.1 (0.0-0.2)                              | 1.3 (0.4-2.2)                                   | 6                            | 1.9 (0.4-3.4)                              | 2.7 (0.6-4.9)                                   |
| 33                               | 10                           | 0.2 (0.1-0.3)                              | 1.3 (0.4-2.2)                                   | 1                            | 0.3 (0.3-0.9)                              | 0.5 (0.4-1.3)                                   |
| 68                               | 4                            | 0.1 (0.0-0.1)                              | 0.7 (0.0-1.3)                                   | 7                            | 2.2 (0.6-3.8)                              | 3.2 (0.9-5.5)                                   |
| 70                               | 7                            | 0.1 (0.0-0.2)                              | 1.2 (0.3-2.0)                                   | 4                            | 1.3 (0.0-2.5)                              | 1.8 (0.1-3.6)                                   |
| 66                               | 10                           | 0.2 (0.1-0.3)                              | 1.7 (0.6-2.7)                                   | -                            | -                                          | -                                               |
| 52                               | 6                            | 0.1 (0.0-0.2)                              | 1.0 (0.2-1.8)                                   | 3                            | 0.9 (0.1-2.0)                              | 1.4 (0.2-2.9)                                   |
| 58                               | 4                            | 0.1 (0.0-0.1)                              | 0.7 (0.0-1.3)                                   | 5                            | 1.6 (0.2-2.9)                              | 2.3 (0.3-4.3)                                   |
| 18                               | 7                            | 0.1 (0.0-0.2)                              | 1.2 (0.3-2.0)                                   | 1                            | 0.3 (0.3-0.9)                              | 0.5 (0.4-1.3)                                   |
| 56                               | 3                            | 0.1 (0.0-0.1)                              | 0.5 (0.0-1.1)                                   | 4                            | 1.3 (0.0-2.5)                              | 1.8 (0.1-3.6)                                   |
| 35                               | 3                            | 0.1 (0.0-0.1)                              | 0.5 (0.0-1.1)                                   | 2                            | 0.6 (0.2-1.5)                              | 0.9 (0.3-2.2)                                   |
| 39                               | 3                            | 0.1 (0.0-0.1)                              | 0.5 (0.0-1.1)                                   | 2                            | 0.6 (0.2-1.5)                              | 0.9 (0.3-2.2)                                   |
| 73                               | 3                            | 0.1 (0.0-0.1)                              | 0.5 (0.0-1.1)                                   | 1                            | 0.3 (0.3-0.9)                              | 0.5 (0.4-1.3)                                   |
| 45                               | 2                            | 0.0 (0.0-0.1)                              | 0.3 (0.0-0.8)                                   | 1                            | 0.3 (0.3-0.9)                              | 0.5 (0.4-1.3)                                   |

|    |                                   |                 |            |                      |                         |            |                         |
|----|-----------------------------------|-----------------|------------|----------------------|-------------------------|------------|-------------------------|
| 1  |                                   |                 |            |                      |                         |            |                         |
| 2  |                                   |                 |            |                      |                         |            |                         |
| 3  |                                   |                 |            |                      |                         |            |                         |
| 4  |                                   | 67              | 2          | 0.0 (0.0-0.1)        | 0.3 (0.0-0.8)           | -          | -                       |
| 5  |                                   | 69              | 1          | 0.0 (0.0-0.1)        | 0.2 (0.0-0.5)           | -          | -                       |
| 6  |                                   | 69/71           | 1          | 0.0 (0.0-0.1)        | 0.2 (0.0-0.5)           | -          | -                       |
| 7  |                                   |                 |            |                      |                         |            |                         |
| 8  | <b>LR HPV types<sup>2</sup></b>   |                 |            |                      |                         |            |                         |
| 9  |                                   | 42              | 11         | 0.2 (0.1-0.3)        | 1.8 (0.8-2.9)           | 6          | 1.9 (0.4-3.4)           |
| 10 |                                   | 84              | 10         | 0.2 (0.1-0.3)        | 1.7 (0.6-2.7)           | 2          | 0.6 (0.2-1.5)           |
| 11 |                                   | 62              | 9          | 0.2 (0.1-0.3)        | 1.5 (0.5-2.5)           | 2          | 0.6 (0.2-1.5)           |
| 12 |                                   | 61              | 8          | 0.1 (0.0-0.2)        | 1.3 (0.4-2.2)           | 2          | 0.6 (0.2-1.5)           |
| 13 |                                   | 6               | 8          | 0.1 (0.0-0.2)        | 1.3 (0.4-2.2)           | 1          | 0.3 (0.3-0.9)           |
| 14 |                                   | 55              | 2          | 0.0 (0.0-0.1)        | 0.3 (0.0-0.8)           | 7          | 2.2 (0.6-3.8)           |
| 15 |                                   | 81              | 7          | 0.1 (0.0-0.2)        | 1.2 (0.3-2.0)           | 2          | 0.6 (0.2-1.5)           |
| 16 |                                   | 89              | 5          | 0.1 (0.0-0.2)        | 0.8 (0.1-1.6)           | -          | -                       |
| 17 |                                   | 54              | 4          | 0.1 (0.0-0.1)        | 0.7 (0.0-1.3)           | -          | -                       |
| 18 |                                   | 11              | 2          | 0.0 (0.0-0.1)        | 0.3 (0.0-0.8)           | -          | -                       |
| 19 |                                   | 43              | 2          | 0.0 (0.0-0.1)        | 0.3 (0.0-0.8)           | -          | -                       |
| 20 |                                   | 72              | 2          | 0.0 (0.0-0.1)        | 0.3 (0.0-0.8)           | -          | -                       |
| 21 |                                   | 83              | 2          | 0.0 (0.0-0.1)        | 0.3 (0.0-0.8)           | -          | -                       |
| 22 |                                   | 40              | 1          | 0.0 (0.0-0.1)        | 0.2 (0.0-0.5)           | 1          | 0.3 (0.3-0.9)           |
| 23 |                                   |                 |            |                      |                         |            |                         |
| 24 | <b>X</b>                          |                 | <b>24</b>  | <b>0.4 (0.3-0.6)</b> | <b>4.0 (2.4-5.6)</b>    | <b>4</b>   | <b>1.3 (0.0-2.5)</b>    |
| 25 |                                   |                 |            |                      |                         |            |                         |
| 26 | <b>Multiple types</b>             |                 | <b>317</b> | <b>5.6 (5.0-6.2)</b> | <b>52.7 (48.8-56.7)</b> | <b>116</b> | <b>36.6 (31.3-41.9)</b> |
| 27 |                                   |                 |            |                      |                         |            |                         |
| 28 | <b>Number of multiple types</b>   |                 |            |                      |                         |            |                         |
| 29 |                                   | 2 types         | 153        | 2.7 (2.3-3.1)        | 25.5 (22.0-28.9)        | 50         | 15.8 (11.8-19.8)        |
| 30 |                                   | 3 types         | 81         | 1.4 (1.1-1.7)        | 13.5 (10.7-16.2)        | 34         | 10.7 (7.3-14.1)         |
| 31 |                                   | 4 types         | 57         | 1.0 (0.7-1.3)        | 9.5 (7.1-11.8)          | 16         | 5.0 (2.6-7.5)           |
| 32 |                                   | 5 or more types | 26         | 0.5 (0.3-0.6)        | 4.3 (2.7-6.0)           | 16         | 5.0 (2.6-7.5)           |
| 33 |                                   |                 |            |                      |                         |            |                         |
| 34 | <b>Most frequent combinations</b> |                 |            |                      |                         |            |                         |
| 35 |                                   | 16 with others  | 113        | 2.0 (1.6-2.3)        | 18.8 (15.7-21.9)        | 40         | 12.6 (9.0-16.3)         |
| 36 |                                   |                 |            |                      |                         |            |                         |
| 37 |                                   |                 |            |                      |                         |            |                         |
| 38 |                                   |                 |            |                      |                         |            |                         |
| 39 |                                   |                 |            |                      |                         |            |                         |
| 40 |                                   |                 |            |                      |                         |            |                         |
| 41 |                                   |                 |            |                      |                         |            |                         |
| 42 |                                   |                 |            |                      |                         |            |                         |
| 43 |                                   |                 |            |                      |                         |            |                         |
| 44 |                                   |                 |            |                      |                         |            |                         |
| 45 |                                   |                 |            |                      |                         |            |                         |
| 46 |                                   |                 |            |                      |                         |            |                         |

|    |                |    |               |                |    |                |                 |
|----|----------------|----|---------------|----------------|----|----------------|-----------------|
| 1  |                |    |               |                |    |                |                 |
| 2  |                |    |               |                |    |                |                 |
| 3  |                |    |               |                |    |                |                 |
| 4  |                |    |               |                |    |                |                 |
| 5  | 51 with others | 56 | 1.0 (0.7-1.2) | 9.3 (7.0-11.6) | 22 | 6.9 (4.1-9.7)  | 10.0 (6.1-14.0) |
| 6  | 53 with others | 50 | 0.9 (0.6-1.1) | 8.3 (6.1-10.5) | 31 | 9.8 (6.5-13.0) | 14.2 (9.5-18.8) |
| 7  | 31 with others | 38 | 0.7 (0.5-0.9) | 6.3 (4.4-8.3)  | 16 | 5.0 (2.6-7.5)  | 7.3 (3.9-10.8)  |
| 8  | 42 with others | 42 | 0.7 (0.5-1.0) | 7.0 (5.0-9.0)  | 17 | 5.4 (2.9-7.8)  | 7.8 (4.2-11.3)  |
| 9  | 6 with others  | 16 | 0.3 (0.1-0.4) | 2.7 (1.4-3.9)  | 9  | 2.8 (1.0-4.7)  | 4.1 (1.5-6.7)   |
| 10 | 18 with others | 36 | 0.6 (0.4-0.8) | 6.0 (4.1-7.9)  | 6  | 1.9 (0.4-3.4)  | 2.7 (0.6-4.9)   |
| 11 | 33 with others | 17 | 0.3 (0.2-0.4) | 2.8 (1.5-4.2)  | 3  | 0.9 (0.0-2.0)  | 1.4 (0.0-2.9)   |
| 12 | 59 with others | 50 | 0.9 (0.6-1.1) | 8.3 (6.1-10.5) | 17 | 5.4 (2.9-7.8)  | 7.8 (4.2-11.3)  |
| 13 | 39 with others | 27 | 0.5 (0.3-0.7) | 4.5 (2.8-6.1)  | 10 | 3.2 (1.2-5.1)  | 4.6 (1.8-7.3)   |
| 14 | 35 with others | 13 | 0.2 (0.1-0.4) | 2.2 (1.0-3.3)  | 6  | 1.9 (0.4-3.4)  | 2.7 (0.6-4.9)   |
| 15 | 52 with others | 40 | 0.7 (0.5-0.9) | 6.7 (4.7-8.6)  | 14 | 4.4 (2.2-6.7)  | 6.4 (3.2-9.6)   |
| 16 | 56 with others | 29 | 0.5 (0.3-0.7) | 4.8 (3.1-6.5)  | 14 | 4.4 (2.2-6.7)  | 6.4 (3.2-9.6)   |
| 17 | 58 with others | 32 | 0.6 (0.4-0.8) | 5.3 (3.5-7.1)  | 10 | 3.2 (1.2-5.1)  | 4.6 (1.8-7.3)   |
| 18 | 62 with others | 37 | 0.6 (0.4-0.9) | 6.2 (4.2-8.1)  | 9  | 2.8 (1.0-4.7)  | 4.1 (1.5-6.7)   |
| 19 | 61 with others | 29 | 0.5 (0.3-0.7) | 4.8 (3.1-6.5)  | 15 | 4.7 (2.4-7.1)  | 6.8 (3.5-10.2)  |
| 20 | 66 with others | 38 | 0.7 (0.5-0.9) | 6.3 (4.4-8.3)  | 12 | 3.8 (1.7-5.9)  | 5.5 (2.5-8.5)   |
| 21 | 45 with others | 24 | 0.4 (0.3-0.6) | 4.0 (2.4-5.6)  | 10 | 3.2 (1.2-5.1)  | 4.6 (1.8-7.3)   |
| 22 | 68 with others | 22 | 0.4 (0.2-0.5) | 3.7 (2.2-5.2)  | 10 | 3.2 (1.2-5.1)  | 4.6 (1.8-7.3)   |
| 23 | 54 with others | 34 | 0.6 (0.4-0.8) | 5.7 (3.8-7.5)  | 14 | 4.4 (2.2-6.7)  | 6.4 (3.2-9.6)   |
| 24 | 70 with others | 11 | 0.2 (0.1-0.3) | 1.8 (0.8-2.9)  | 4  | 1.3 (0.0-2.5)  | 1.8 (0.1-6.3)   |
| 25 | 84 with others | 30 | 0.5 (0.3-0.7) | 5.0 (3.3-6.7)  | 8  | 2.5 (0.8-4.3)  | 3.7 (1.2-6.1)   |
| 26 | 55 with others | 11 | 0.2 (0.1-0.3) | 1.8 (0.8-2.9)  | 7  | 2.2 (0.6-3.8)  | 3.2 (0.9-5.5)   |
| 27 | 11 with others | 6  | 0.1 (0.0-0.2) | 1.0 (0.2-1.8)  | 2  | 0.6 (0.0-1.5)  | 0.9 (0.3-2.2)   |
| 28 | 81 with others | 19 | 0.3 (0.2-0.5) | 3.2 (1.8-4.6)  | 9  | 2.8 (1.0-4.7)  | 4.1 (1.5-6.7)   |
| 29 | 40 with others | 10 | 0.2 (0.1-0.3) | 1.7 (0.6-2.7)  | -  | -              | -               |
| 30 | 89 with others | 32 | 0.6 (0.4-0.8) | 5.3 (3.5-7.1)  | 14 | 4.4 (2.2-6.7)  | 6.4 (3.2-9.6)   |
| 31 | 67 with others | 9  | 0.2 (0.1-0.3) | 1.5 (0.5-2.5)  | 4  | 1.3 (0.0-2.5)  | 1.8 (0.1-3.6)   |
| 32 |                |    |               |                |    |                |                 |
| 33 |                |    |               |                |    |                |                 |
| 34 |                |    |               |                |    |                |                 |
| 35 |                |    |               |                |    |                |                 |
| 36 |                |    |               |                |    |                |                 |
| 37 |                |    |               |                |    |                |                 |
| 38 |                |    |               |                |    |                |                 |
| 39 |                |    |               |                |    |                |                 |
| 40 |                |    |               |                |    |                |                 |
| 41 |                |    |               |                |    |                |                 |
| 42 |                |    |               |                |    |                |                 |
| 43 |                |    |               |                |    |                |                 |
| 44 |                |    |               |                |    |                |                 |
| 45 |                |    |               |                |    |                |                 |
| 46 |                |    |               |                |    |                |                 |

1  
2  
3  
4  
5  
6  
7  
8  
9  
10  
11  
12  
13  
14  
15  
16  
17  
18  
19  
20  
21  
22  
23  
24  
25  
26  
27  
28  
29  
30  
31  
32  
33  
34  
35  
36  
37  
38  
39  
40  
41  
42  
43  
44  
45  
46

|                                        |     |               |                  |     |                  |                  |
|----------------------------------------|-----|---------------|------------------|-----|------------------|------------------|
| 69 with others                         | 5   | 0.1 (0.0-0.2) | 0.8 (0.1-1.6)    | -   | -                | -                |
| 73 with others                         | 16  | 0.3 (0.1-0.4) | 2.7 (1.4-3.9)    | 7   | 2.2 (0.6-3.8)    | 3.2 (0.9-5.5)    |
| 83 with others                         | 9   | 0.2 (0.1-0.3) | 1.5 (0.5-2.5)    | 6   | 1.9 (0.4-3.4)    | 2.7 (0.6-4.9)    |
| 43 with others                         | 0   | 0.0 (0.0-0.0) | 0.0 (0.0-0.0)    | -   | -                | -                |
| 72 with others                         | 4   | 0.1 (0.0-0.1) | 0.7 (0.0-1.3)    | 4   | 1.3 (0.0-2.5)    | 1.8 (0.1-3.6)    |
| 69/71 with others                      | 2   | 0.0 (0.0-0.1) | 0.3 (0.0-0.8)    | -   | -                | -                |
| 71 with others                         | 6   | 0.1 (0.0-0.2) | 1.0 (0.2-1.8)    | 3   | 0.9 (0.0-2.0)    | 1.4 (0.0-2.9)    |
| 74 with others                         | 5   | 0.1 (0.0-0.2) | 0.8 (0.1-1.6)    | 1   | 0.3 (0.0-0.9)    | 0.5 (0.0-1.3)    |
| 64 with others                         | 1   | 0.0 (0.0-0.1) | 0.2 (0.0-0.5)    | 1   | 0.3 (0.0-0.9)    | 0.5 (0.0-1.3)    |
| 82 with others                         | 10  | 0.2 (0.1-0.3) | 1.7 (0.6-2.7)    | 3   | 0.9 (0.0-2.0)    | 1.4 (0.0-2.9)    |
| <b>Combinations of vaccine types</b>   |     |               |                  |     |                  |                  |
| 6/11 <sup>3</sup>                      | 31  | 0.5 (0.4-0.7) | 5.2 (3.4-6.9)    | 12  | 3.8 (1.7-5.9)    | 5.5 (2.5-8.5)    |
| 16/18 <sup>3</sup>                     | 199 | 3.5 (3.0-4.0) | 33.1 (29.3-36.9) | 62  | 19.6 (15.2-23.9) | 28.3 (22.3-34.3) |
| 6/11/16/18 <sup>3</sup>                | 225 | 4.0 (3.4-4.5) | 37.4 (33.6-41.3) | 72  | 22.7 (18.1-27.3) | 32.9 (26.7-39.1) |
| 6/11/16/18/31/33/45/52/58 <sup>3</sup> | 334 | 5.9 (5.3-6.5) | 55.6 (51.6-59.5) | 110 | 34.7 (29.5-39.9) | 50.2 (43.6-56.9) |

HPV: Human Papillomavirus; HR: High-Risk; LR: Low-Risk; CI: Confidence Interval.  
<sup>1</sup> HR types includes high-risk types and possibly /probably high-risk types: 16, 18, 31, 33, 35, 39, 45, 51, 52, 56, 58, 59, 53, 66, 67, 68, 69, 69/71, 70, 73. <sup>2</sup> LR types includes: 6, 11, 40, 42, 43, 54, 55, 61, 62, 72, 81, 83, 84, 89. <sup>3</sup> One or more of the vaccine types are concerned.

Supplementary table 3 – Human Papillomavirus (HPV) type-specific distribution of the most common types (n=6,010 women) by result of abnormal cytology.

| HPV type                        | ASCUS (n=214)                |                                            |                                                 | LSIL (n=91)                  |                                            |                                                 | HSIL+ (n=12)                 |                                            |                                                 |
|---------------------------------|------------------------------|--------------------------------------------|-------------------------------------------------|------------------------------|--------------------------------------------|-------------------------------------------------|------------------------------|--------------------------------------------|-------------------------------------------------|
|                                 | Number of HPV positive women | HPV prevalence among all women (%; 95% CI) | HPV prevalence among positive women (%; 95% CI) | Number of HPV positive women | HPV prevalence among all women (%; 95% CI) | HPV prevalence among positive women (%; 95% CI) | Number of HPV positive women | HPV prevalence among all women (%; 95% CI) | HPV prevalence among positive women (%; 95% CI) |
| <b>Any HPV type</b>             | <b>130</b>                   | <b>60.7 (54.2-67.3)</b>                    | <b>-</b>                                        | <b>79</b>                    | <b>86.8 (79.9-93.8)</b>                    | <b>-</b>                                        | <b>10</b>                    | <b>83.3 (62.2-100.0)</b>                   | <b>-</b>                                        |
| <b>Single types</b>             | <b>66</b>                    | <b>30.8 (24.7-37.0)</b>                    | <b>50.8 (42.2-59.4)</b>                         | <b>29</b>                    | <b>31.9 (22.3-41.4)</b>                    | <b>36.7 (26.1-47.3)</b>                         | <b>4</b>                     | <b>33.3 (6.7-60.0)</b>                     | <b>40.0 (9.6-70.4)</b>                          |
| <i>HR HPV types<sup>1</sup></i> |                              |                                            |                                                 |                              |                                            |                                                 |                              |                                            |                                                 |
| 16                              | 13                           | 6.1 (2.9-9.3)                              | 10.0 (4.8-15.2)                                 | 4                            | 4.4 (0.2-8.6)                              | 5.1 (0.2-9.9)                                   | 2                            | 16.7 (0.0-37.8)                            | 20.0 (0.0-44.8)                                 |
| 51                              | 6                            | 2.8 (0.6-5.0)                              | 4.6 (1.0-8.2)                                   | 5                            | 5.5 (0.8-10.2)                             | 6.3 (1.0-11.7)                                  | 1                            | 8.3 (0.0-24.0)                             | 10.0 (0.0-28.6)                                 |
| 53                              | 5                            | 2.3 (0.3-4.4)                              | 3.8 (0.5-7.2)                                   | 2                            | 2.2 (0.0-5.2)                              | 2.5 (0.0-6.0)                                   | -                            | -                                          | -                                               |
| 31                              | 2                            | 0.9 (0.0-2.2)                              | 1.5 (0.0-3.7)                                   | -                            | -                                          | -                                               | -                            | -                                          | -                                               |
| 59                              | 5                            | 2.3 (0.3-4.4)                              | 3.8 (0.5-7.2)                                   | 1                            | 1.1 (0.0-3.2)                              | 1.3 (0.0-3.7)                                   | -                            | -                                          | -                                               |
| 33                              | 1                            | 0.5 (0.0-1.4)                              | 0.8 (0.0-2.3)                                   | -                            | -                                          | -                                               | -                            | -                                          | -                                               |
| 68                              | 5                            | 2.3 (0.3-4.4)                              | 3.8 (0.5-7.2)                                   | 2                            | 2.2 (0.0-5.2)                              | 2.5 (0.0-6.0)                                   | -                            | -                                          | -                                               |
| 70                              | 2                            | 0.9 (0.0-2.2)                              | 1.5 (0.0-3.7)                                   | 2                            | 2.2 (0.0-5.2)                              | 2.5 (0.0-6.0)                                   | -                            | -                                          | -                                               |
| 66                              | -                            | -                                          | -                                               | -                            | -                                          | -                                               | -                            | -                                          | -                                               |
| 52                              | 2                            | 0.9 (0.0-2.2)                              | 1.5 (0.0-3.7)                                   | 1                            | 1.1 (0.0-3.2)                              | 1.3 (0.0-3.7)                                   | -                            | -                                          | -                                               |
| 58                              | 3                            | 1.4 (0.0-3.0)                              | 2.3 (0.0-4.9)                                   | 2                            | 2.2 (0.0-5.2)                              | 2.5 (0.0-6.0)                                   | -                            | -                                          | -                                               |
| 18                              | 1                            | 0.5 (0.0-1.4)                              | 0.8 (0.0-2.3)                                   | -                            | -                                          | -                                               | -                            | -                                          | -                                               |
| 56                              | 2                            | 0.9 (0.0-2.2)                              | 1.5 (0.0-3.7)                                   | 2                            | 2.2 (0.0-5.2)                              | 2.5 (0.0-6.0)                                   | -                            | -                                          | -                                               |
| 35                              | 2                            | 0.9 (0.0-2.2)                              | 1.5 (0.0-3.7)                                   | -                            | -                                          | -                                               | -                            | -                                          | -                                               |
| 39                              | 1                            | 0.5 (0.0-1.4)                              | 0.8 (0.0-2.3)                                   | 1                            | 1.1 (0.0-3.2)                              | 1.3 (0.0-3.7)                                   | -                            | -                                          | -                                               |
| 73                              | -                            | -                                          | -                                               | -                            | -                                          | -                                               | 1                            | 8.3 (0.0-24.0)                             | 10.0 (0.0-28.6)                                 |

|    |                                 |           |                         |                         |           |                         |                         |          |                         |                         |
|----|---------------------------------|-----------|-------------------------|-------------------------|-----------|-------------------------|-------------------------|----------|-------------------------|-------------------------|
| 1  |                                 |           |                         |                         |           |                         |                         |          |                         |                         |
| 2  |                                 |           |                         |                         |           |                         |                         |          |                         |                         |
| 3  |                                 |           |                         |                         |           |                         |                         |          |                         |                         |
| 4  |                                 |           |                         |                         |           |                         |                         |          |                         |                         |
| 5  | 45                              | 1         | 0.5 (0.0-1.4)           | 0.8 (0.0-2.3)           | -         | -                       | -                       | -        | -                       | -                       |
| 6  | 67                              | -         | -                       | -                       | -         | -                       | -                       | -        | -                       | -                       |
| 7  | 69                              | -         | -                       | -                       | -         | -                       | -                       | -        | -                       | -                       |
| 8  | 69/71                           | -         | -                       | -                       | -         | -                       | -                       | -        | -                       | -                       |
| 9  | <b>LR HPV types<sup>2</sup></b> |           |                         |                         |           |                         |                         |          |                         |                         |
| 10 |                                 |           |                         |                         |           |                         |                         |          |                         |                         |
| 11 | 42                              | 3         | 1.4 (0.0-3.0)           | 2.3 (0.0-4.9)           | 3         | 3.3 (0.0-7.0)           | 3.8 (0.0-8.0)           | -        | -                       | -                       |
| 12 | 84                              | 2         | 0.9 (0.0-2.2)           | 1.5 (0.0-3.7)           | -         | -                       | -                       | -        | -                       | -                       |
| 13 | 62                              | 1         | 0.5 (0.0-1.4)           | 0.8 (0.0-2.3)           | 1         | 1.1 (0.0-3.2)           | 1.3 (0.0-3.7)           | -        | -                       | -                       |
| 14 | 61                              | 2         | 0.9 (0.0-2.2)           | 1.5 (0.0-3.7)           | -         | -                       | -                       | -        | -                       | -                       |
| 15 | 6                               | -         | -                       | -                       | 1         | 1.1 (0.0-3.2)           | 1.3 (0.0-3.7)           | -        | -                       | -                       |
| 16 | 55                              | 7         | 3.3 (0.9-5.7)           | 5.4 (1.5-9.3)           | -         | -                       | -                       | -        | -                       | -                       |
| 17 | 81                              | -         | -                       | -                       | 2         | 2.2 (0.0-5.2)           | 2.5 (0.0-6.0)           | -        | -                       | -                       |
| 18 | 89                              | -         | -                       | -                       | -         | -                       | -                       | -        | -                       | -                       |
| 19 | 54                              | -         | -                       | -                       | -         | -                       | -                       | -        | -                       | -                       |
| 20 | 11                              | -         | -                       | -                       | -         | -                       | -                       | -        | -                       | -                       |
| 21 | 43                              | -         | -                       | -                       | -         | -                       | -                       | -        | -                       | -                       |
| 22 | 72                              | -         | -                       | -                       | -         | -                       | -                       | -        | -                       | -                       |
| 23 | 83                              | -         | -                       | -                       | -         | -                       | -                       | -        | -                       | -                       |
| 24 | 40                              | -         | -                       | -                       | -         | -                       | -                       | -        | -                       | -                       |
| 25 |                                 |           |                         |                         |           |                         |                         |          |                         |                         |
| 26 |                                 |           |                         |                         |           |                         |                         |          |                         |                         |
| 27 |                                 |           |                         |                         |           |                         |                         |          |                         |                         |
| 28 |                                 |           |                         |                         |           |                         |                         |          |                         |                         |
| 29 | <b>X</b>                        | <b>3</b>  | <b>1.4 (0.0-3.0)</b>    | <b>2.3 (0.0-4.9)</b>    | <b>1</b>  | <b>1.1 (0.0-3.2)</b>    | <b>1.3 (0.0-3.7)</b>    | -        | -                       | -                       |
| 30 | <b>Multiple types</b>           | <b>61</b> | <b>28.5 (22.5-34.6)</b> | <b>46.9 (38.3-55.5)</b> | <b>49</b> | <b>53.8 (43.6-64.1)</b> | <b>62.0 (51.3-72.7)</b> | <b>6</b> | <b>50.0 (21.7-78.3)</b> | <b>60.0 (29.6-90.4)</b> |
| 31 | <b>Number of</b>                |           |                         |                         |           |                         |                         |          |                         |                         |
| 32 | <b>multiple types</b>           |           |                         |                         |           |                         |                         |          |                         |                         |
| 33 |                                 |           |                         |                         |           |                         |                         |          |                         |                         |
| 34 | 2 types                         | 28        | 13.1 (8.6-17.6)         | 21.5 (14.5-28.6)        | 20        | 22.0 (13.5-30.5)        | 25.3 (15.7-34.9)        | 2        | 16.7 (0.0-37.8)         | 20.0 (0.0-44.8)         |
| 35 | 3 types                         | 19        | 8.9 (5.1-12.7)          | 14.6 (8.5-20.7)         | 12        | 13.2 (6.2-20.1)         | 15.2 (7.3-23.1)         | 3        | 25.0 (0.5-49.5)         | 30.0 (1.6-58.4)         |
| 36 | 4 types                         | 9         | 4.2 (1.5-6.9)           | 6.9 (2.6-11.3)          | 7         | 7.7 (2.2-13.2)          | 8.9 (2.6-15.1)          | 0        | 0.0 (0.0-0.0)           | 0.0 (0.0-0.0)           |
| 37 | 5 or more types                 | 5         | 2.3 (0.3-4.4)           | 3.8 (0.5-7.2)           | 10        | 11.0 (4.6-17.4)         | 12.7 (5.3-20.0)         | 1        | 8.3 (0.0-24.0)          | 10.0 (0.0-28.6)         |
| 38 |                                 |           |                         |                         |           |                         |                         |          |                         |                         |
| 39 |                                 |           |                         |                         |           |                         |                         |          |                         |                         |
| 40 |                                 |           |                         |                         |           |                         |                         |          |                         |                         |
| 41 |                                 |           |                         |                         |           |                         |                         |          |                         |                         |
| 42 |                                 |           |                         |                         |           |                         |                         |          |                         |                         |
| 43 |                                 |           |                         |                         |           |                         |                         |          |                         |                         |
| 44 |                                 |           |                         |                         |           |                         |                         |          |                         |                         |
| 45 |                                 |           |                         |                         |           |                         |                         |          |                         |                         |
| 46 |                                 |           |                         |                         |           |                         |                         |          |                         |                         |

1  
2  
3  
4 **Most frequent**  
5 **combinations**  
6

|    |                |    |                |                 |    |                 |                 |   |                 |                 |
|----|----------------|----|----------------|-----------------|----|-----------------|-----------------|---|-----------------|-----------------|
| 7  | 16 with others | 16 | 7.5 (4.0-11.0) | 12.3 (6.7-18.0) | 22 | 24.2 (15.4-33)  | 27.8 (18-37.7)  | 2 | 16.7 (0.0-37.8) | 20.0 (0.0-44.8) |
| 8  | 51 with others | 12 | 5.6 (2.5-8.7)  | 9.2 (4.3-14.2)  | 9  | 9.9 (3.8-16.0)  | 11.4 (4.4-18.4) | 1 | 8.3 (0.0-24.0)  | 10.0 (0.0-28.6) |
| 9  | 53 with others | 16 | 7.5 (4.0-11.0) | 12.3 (6.7-18.0) | 14 | 15.4 (8.0-22.8) | 17.7 (9.3-26.1) | 1 | 8.3 (0.0-24.0)  | 10.0 (0.0-28.6) |
| 10 | 31 with others | 7  | 3.3 (0.9-5.7)  | 5.4 (1.5-9.3)   | 6  | 6.6 (1.5-11.7)  | 7.6 (1.8-13.4)  | 3 | 25.0 (0.5-49.5) | 30.0 (1.6-58.4) |
| 11 | 42 with others | 9  | 4.2 (1.5-6.9)  | 6.9 (2.6-11.3)  | 7  | 7.7 (2.2-13.2)  | 8.9 (2.6-15.1)  | 1 | 8.3 (0.0-24.0)  | 10.0 (0.0-28.6) |
| 12 | 6 with others  | 5  | 2.3 (0.3-4.4)  | 3.8 (0.5-7.2)   | 4  | 4.4 (0.2-8.6)   | 5.1 (0.2-9.9)   | - | -               | -               |
| 13 | 18 with others | 2  | 0.9 (0.0-2.2)  | 1.5 (0.0-3.7)   | 4  | 4.4 (0.2-8.6)   | 5.1 (0.2-9.9)   | - | -               | -               |
| 14 | 33 with others | 1  | 0.5 (0.0-1.4)  | 0.8 (0.0-2.3)   | 2  | 2.2 (0.0-5.2)   | 2.5 (0.0-6.0)   | - | -               | -               |
| 15 | 59 with others | 8  | 3.7 (1.2-6.3)  | 6.2 (2.0-10.3)  | 8  | 8.8 (3.0-14.6)  | 10.1 (3.5-16.8) | 1 | 8.3 (0.0-24.0)  | 10.0 (0.0-28.6) |
| 16 | 39 with others | 8  | 3.7 (1.2-6.3)  | 6.2 (2.0-10.3)  | 1  | 1.1 (0.0-3.2)   | 1.3 (0.0-3.7)   | 1 | 8.3 (0.0-24.0)  | 10.0 (0.0-28.6) |
| 17 | 35 with others | 3  | 1.4 (0.0-3.0)  | 2.3 (0.0-4.9)   | 2  | 2.2 (0.0-5.2)   | 2.5 (0.0-6.0)   | 1 | 8.3 (0.0-24.0)  | 10.0 (0.0-28.6) |
| 18 | 52 with others | 4  | 1.9 (0.1-3.7)  | 3.1 (0.1-6.0)   | 8  | 8.8 (3.0-14.6)  | 10.1 (3.5-16.8) | 2 | 16.7 (0.0-37.8) | 20.0 (0.0-44.8) |
| 19 | 56 with others | 6  | 2.8 (0.6-5.0)  | 4.6 (1.0-8.2)   | 8  | 8.8 (3.0-14.6)  | 10.1 (3.5-16.8) | - | -               | -               |
| 20 | 58 with others | 5  | 2.3 (0.3-4.4)  | 3.8 (0.5-7.2)   | 5  | 5.5 (0.8-10.2)  | 6.3 (1.0-11.7)  | - | -               | -               |
| 21 | 62 with others | 5  | 2.3 (0.3-4.4)  | 3.8 (0.5-7.2)   | 4  | 4.4 (0.2-8.6)   | 5.1 (0.2-9.9)   | - | -               | -               |
| 22 | 61 with others | 7  | 3.3 (0.9-5.7)  | 5.4 (1.5-9.3)   | 8  | 8.8 (3.0-14.6)  | 10.1 (3.5-16.8) | - | -               | -               |
| 23 | 66 with others | 6  | 2.8 (0.6-5.0)  | 4.6 (1.0-8.2)   | 6  | 6.6 (1.5-11.7)  | 7.6 (1.8-13.4)  | - | -               | -               |
| 24 | 45 with others | 3  | 1.4 (0.0-3.0)  | 2.3 (0.0-4.9)   | 4  | 4.4 (0.2-8.6)   | 5.1 (0.2-9.9)   | 3 | 25 (0.5-49.5)   | 30.0 (1.6-58.4) |
| 25 | 68 with others | 6  | 2.8 (0.6-5.0)  | 4.6 (1.0-8.2)   | 3  | 3.3 (0.0-7.0)   | 3.8 (0.0-8.0)   | 1 | 8.3 (0.0-24.0)  | 10.0 (0.0-28.6) |
| 26 | 54 with others | 8  | 3.7 (1.2-6.3)  | 6.2 (2.0-10.3)  | 4  | 4.4 (0.2-8.6)   | 5.1 (0.2-9.9)   | - | -               | -               |
| 27 | 70 with others | 1  | 0.5 (0.0-1.4)  | 0.8 (0.0-2.3)   | 3  | 3.3 (0.0-7.0)   | 3.8 (0.0-8.0)   | - | -               | -               |
| 28 | 84 with others | 4  | 1.9 (0.1-3.7)  | 3.1 (0.1-6.0)   | 4  | 4.4 (0.2-8.6)   | 5.1 (0.2-9.9)   | - | -               | -               |
| 29 | 55 with others | 4  | 1.9 (0.1-3.7)  | 3.1 (0.1-6.0)   | 3  | 3.3 (0.0-7.0)   | 3.8 (0.0-8.0)   | - | -               | -               |
| 30 | 11 with others | 1  | 0.5 (0.0-1.4)  | 0.8 (0.0-2.3)   | 1  | 1.1 (0.0-3.2)   | 1.3 (0.0-3.7)   | - | -               | -               |
| 31 | 81 with others | 6  | 2.8 (0.6-5.0)  | 4.6 (1.0-8.2)   | 3  | 3.3 (0.0-7.0)   | 3.8 (0.0-8.0)   | - | -               | -               |



|    |                         |    |                  |                  |    |                  |                  |   |                  |                   |
|----|-------------------------|----|------------------|------------------|----|------------------|------------------|---|------------------|-------------------|
| 1  |                         |    |                  |                  |    |                  |                  |   |                  |                   |
| 2  |                         |    |                  |                  |    |                  |                  |   |                  |                   |
| 3  |                         |    |                  |                  |    |                  |                  |   |                  |                   |
| 4  | 40 with others          | -  | -                | -                | -  | -                | -                | - | -                | -                 |
| 5  | 89 with others          | 8  | 3.7 (1.2-6.3)    | 6.2 (2.0-10.3)   | 6  | 6.6 (1.5-11.7)   | 7.6 (1.8-13.4)   | - | -                | -                 |
| 6  | 67 with others          | 3  | 1.4 (0.0-3.0)    | 2.3 (0.0-4.9)    | 1  | 1.1 (0.0-3.2)    | 1.3 (0.0-3.7)    | - | -                | -                 |
| 7  | 69 with others          | -  | -                | -                | -  | -                | -                | - | -                | -                 |
| 8  | 73 with others          | 3  | 1.4 (0.0-3.0)    | 2.3 (0.0-4.9)    | 4  | 4.4 (0.2-8.6)    | 5.1 (0.2-9.9)    | 0 | 0.0 (0.0-0.0)    | 0.0 (0.0-0.0)     |
| 9  | 83 with others          | 5  | 2.3 (0.3-4.4)    | 3.8 (0.5-7.2)    | 1  | 1.1 (0.0-3.2)    | 1.3 (0.0-3.7)    | - | -                | -                 |
| 10 | 43 with others          | -  | -                | -                | -  | -                | -                | - | -                | -                 |
| 11 | 72 with others          | 1  | 0.5 (0.0-1.4)    | 0.8 (0.0-2.3)    | 3  | 3.3 (0.0-7.0)    | 3.8 (0.0-8.0)    | - | -                | -                 |
| 12 | 69/71 with others       | -  | -                | -                | -  | -                | -                | - | -                | -                 |
| 13 | 71 with others          | 2  | 0.9 (0.0-2.2)    | 1.5 (0.0-3.7)    | 1  | 1.1 (0.0-3.2)    | 1.3 (0.0-3.7)    | - | -                | -                 |
| 14 | 74 with others          | 1  | 0.5 (0.0-1.4)    | 0.8 (0.0-2.3)    | -  | -                | -                | - | -                | -                 |
| 15 | 64 with others          | 1  | 0.5 (0.0-1.4)    | 0.8 (0.0-2.3)    | -  | -                | -                | - | -                | -                 |
| 16 | 82 with others          | 2  | 0.9 (0.0-2.2)    | 1.5 (0.0-3.7)    | -  | -                | -                | 1 | 8.3 (0.0-24.0)   | 10.0 (0.0-28.6)   |
| 17 |                         |    |                  |                  |    |                  |                  |   |                  |                   |
| 18 |                         |    |                  |                  |    |                  |                  |   |                  |                   |
| 19 |                         |    |                  |                  |    |                  |                  |   |                  |                   |
| 20 |                         |    |                  |                  |    |                  |                  |   |                  |                   |
| 21 | <b>Combinations of</b>  |    |                  |                  |    |                  |                  |   |                  |                   |
| 22 | <b>vaccine types</b>    |    |                  |                  |    |                  |                  |   |                  |                   |
| 23 |                         |    |                  |                  |    |                  |                  |   |                  |                   |
| 24 | 6/11 <sup>3</sup>       | 6  | 2.8 (0.6-5.0)    | 4.6 (1.0-8.2)    | 6  | 6.6 (1.5-11.7)   | 7.6 (1.8-13.4)   | - | -                | -                 |
| 25 | 16/18 <sup>3</sup>      | 31 | 14.5 (9.8-19.2)  | 23.8 (16.5-31.2) | 27 | 29.7 (20.3-39.1) | 34.2 (23.7-44.6) | 4 | 33.3 (6.7-60.0)  | 40.0 (9.6-70.4)   |
| 26 | 6/11/16/18 <sup>3</sup> | 37 | 17.3 (12.2-22.4) | 28.5 (20.7-36.2) | 31 | 34.1 (24.3-43.8) | 39.2 (28.5-50.0) | 4 | 33.3 (6.7-60.0)  | 40.0 (9.6-70.4)   |
| 27 | 6/11/16/18/31/33        |    |                  |                  |    |                  |                  |   |                  |                   |
| 28 | /45/52/58 <sup>3</sup>  | 57 | 26.6 (20.7-32.6) | 43.8 (35.3-52.4) | 45 | 49.5 (39.2-59.7) | 57.0 (46.0-67.9) | 8 | 66.7 (40.0-93.3) | 80.0 (55.2-100.0) |
| 29 |                         |    |                  |                  |    |                  |                  |   |                  |                   |

HPV: Human Papillomavirus; HR: High-Risk; LR: Low-Risk; ASCUS: Atypical Squamous cells of Undetermined Significance; LSIL: Low-grade Squamous Intraepithelial Lesion; HSIL: High-grade Squamous Intraepithelial Lesion; CI: Confidence Interval.

<sup>1</sup> HR types includes high-risk types and possibly /probably high-risk types: 16, 18, 31, 33, 35, 39, 45, 51, 52, 56, 58, 59, 53, 66, 67, 68, 69, 69/71, 70, 73. <sup>2</sup> LR types includes: 6, 11, 40, 42, 43, 54, 55, 61, 62, 72, 81, 83, 84, 89. <sup>3</sup> One or more of the vaccine types are concerned.

Supplementary table 4 – Crude and multivariate analyses of the association between cervical High-Risk Human Papillomavirus (HR HPV) infection and selected subjects' characteristics (n=5,858 women).

| Study sample characteristics    | Number of HR HPV positive women / number of HPV tested women (negative + HR HPV positive) | HPV prevalence (%) | Adjusted model <sup>1</sup> POR (95% CI) |
|---------------------------------|-------------------------------------------------------------------------------------------|--------------------|------------------------------------------|
| <b>Population</b>               |                                                                                           |                    |                                          |
| Gran Canaria                    | 407 / 3,753                                                                               | 10.8               | 1.0 (ref)                                |
| Tenerife                        | 261 / 2,105                                                                               | 12.4               | 1.0 (0.8-1.2)                            |
| <b>Age distribution (years)</b> |                                                                                           |                    |                                          |
| 18-24                           | 135 / 549                                                                                 | 24.6               | <b>2.9 (1.7-4.8)</b>                     |
| 25-29                           | 129 / 639                                                                                 | 20.2               | <b>2.2 (1.3-3.5)</b>                     |
| 30-34                           | 136 / 869                                                                                 | 15.7               | <b>1.7 (1.0-2.7)</b>                     |
| 35-39                           | 71 / 865                                                                                  | 8.2                | 0.9 (0.5-1.4)                            |
| 40-44                           | 67 / 771                                                                                  | 8.7                | 1.0 (0.6-1.6)                            |
| 45-49                           | 44 / 607                                                                                  | 7.2                | 0.8 (0.5-1.3)                            |
| 50-54                           | 30 / 594                                                                                  | 5.1                | 0.6 (0.4-1.1)                            |
| 55-59                           | 27 / 480                                                                                  | 5.6                | 0.8 (0.5-1.4)                            |
| 60-65                           | 29 / 484                                                                                  | 6.0                | 1.0 (ref)                                |
|                                 | <i>p-value for trend</i>                                                                  |                    | <b><i>p&lt;0.001</i></b>                 |
| <b>Level of education</b>       |                                                                                           |                    |                                          |
| None / Preschool                | 29 / 438                                                                                  | 6.6                | 1.0 (ref)                                |
| Primary                         | 246 / 2,588                                                                               | 9.5                | 0.9 (0.6-1.5)                            |
| Secondary                       | 201 / 1,437                                                                               | 14.0               | 0.9 (0.5-1.3)                            |
| University or higher            | 178 / 1,296                                                                               | 13.7               | 0.9 (0.5-1.4)                            |
| Others                          | 13 / 90                                                                                   | 14.4               | 0.8 (0.4-1.8)                            |
| Missing data                    | 1 / 9                                                                                     | -                  | -                                        |
|                                 | <i>p-value for trend (excluding others)</i>                                               |                    | <i>p=0.3</i>                             |
| <b>Marital status</b>           |                                                                                           |                    |                                          |
| Single                          | 283 / 1,333                                                                               | 21.2               | <b>1.5 (1.2-1.9)</b>                     |
| Married/de facto partnership    | 267 / 3,792                                                                               | 7.0                | 1.0 (ref)                                |
| Divorced/separated              | 99 / 541                                                                                  | 18.3               | <b>2.0 (1.5-2.7)</b>                     |
| Widowed                         | 18 / 184                                                                                  | 9.8                | <b>1.8 (1.0-3.1)</b>                     |
| Missing data                    | 1 / 8                                                                                     | -                  | -                                        |
| <b>Number of live births</b>    |                                                                                           |                    |                                          |
| No <sup>2</sup>                 | 240 / 1,307                                                                               | 18.4               | 1.0 (ref)                                |
| 1                               | 137 / 1,202                                                                               | 11.4               | 0.9 (0.7-1.2)                            |
| 2                               | 136 / 1,725                                                                               | 7.9                | 1.0 (0.8-1.4)                            |
| 3                               | 53 / 754                                                                                  | 7.0                | 1.1 (0.7-1.6)                            |
| ≥4                              | 27 / 448                                                                                  | 6.0                | 1.0 (0.6-1.7)                            |
| Missing data                    | 75 / 422                                                                                  | -                  | -                                        |
| <b>Smoking status</b>           |                                                                                           |                    |                                          |
| Never smoked                    | 298 / 3,324                                                                               | 9.0                | 1.0 (ref)                                |
| Ex smoker                       | 102 / 876                                                                                 | 11.6               | 1.2 (0.9-1.5)                            |

|                                                |                           |             |      |                       |
|------------------------------------------------|---------------------------|-------------|------|-----------------------|
|                                                | Current smoker            | 268 / 1,658 | 16.2 | <b>1.3 (1.1-1.6)</b>  |
| <b>Age at first sexual intercourse (years)</b> |                           |             |      |                       |
|                                                | <15                       | 35 / 179    | 19.6 | 1.0 (0.5-1.8)         |
|                                                | 15-16                     | 136 / 787   | 17.3 | 1.0 (0.6-1.6)         |
|                                                | 17-18                     | 235 / 1,797 | 13.1 | 1.0 (0.6-1.6)         |
|                                                | 19-20                     | 118 / 1,241 | 9.5  | 1.0 (0.6-1.5)         |
|                                                | 21-25                     | 112 / 1,368 | 8.2  | 1.2 (0.7-1.8)         |
|                                                | >25                       | 26 / 418    | 6.2  | 1.0 (ref)             |
|                                                | Missing data              | 6 / 68      | -    | -                     |
|                                                | <i>p-value for trend</i>  |             |      | <i>p=0.6</i>          |
| <b>Lifetime number of sexual partners</b>      |                           |             |      |                       |
|                                                | 1                         | 160 / 3,135 | 5.1  | 1.0 (ref)             |
|                                                | 2-3                       | 224 / 1,495 | 15.0 | <b>2.3 (1.9-2.9)</b>  |
|                                                | 4-5                       | 124 / 596   | 20.8 | <b>3.1 (2.3-4.0)</b>  |
|                                                | 6-10                      | 100 / 376   | 26.6 | <b>4.1 (3.0-5.6)</b>  |
|                                                | 11-20                     | 36 / 121    | 29.8 | <b>4.6 (2.9-7.3)</b>  |
|                                                | >20                       | 16 / 47     | 34.0 | <b>7.1 (3.7-13.6)</b> |
|                                                | Missing data              | 8 / 88      | -    | -                     |
|                                                | <i>p-value for trend</i>  |             |      | <i>p&lt;0.001</i>     |
| <b>Use of oral contraceptives</b>              |                           |             |      |                       |
|                                                | Never                     | 126 / 1,366 | 9.2  | 1.0 (ref)             |
|                                                | Ever                      | 542 / 4,492 | 12.1 | 1.2 (0.97-1.5)        |
| <b>Rhythm method/coitus interruptus</b>        |                           |             |      |                       |
|                                                | Never                     | 316 / 2,933 | 10.8 | 1.0 (ref)             |
|                                                | Ever                      | 352 / 2,925 | 12.0 | 1.1 (0.96-1.4)        |
| <b>Previous cervical lesions</b>               |                           |             |      |                       |
|                                                | No                        | 527 / 4,868 | 10.8 | 1.0 (ref)             |
|                                                | Yes                       | 70 / 364    | 19.2 | <b>1.5 (1.1-2.0)</b>  |
|                                                | Missing data <sup>3</sup> | 71 / 626    | -    | -                     |
| <b>Genital warts</b>                           |                           |             |      |                       |
|                                                | Never                     | 633 / 5,744 | 11.0 | 1.0 (ref)             |
|                                                | Ever                      | 35 / 114    | 30.7 | <b>2.0 (1.3-3.2)</b>  |

<sup>1</sup> Adjusted model: adjusted for age group, population, level of education, marital status, smoking habits, lifetime number of sexual partners, previous cervical lesions, and ever had genital warts. <sup>2</sup> Includes women who were pregnant but had 0 live births. <sup>3</sup> Includes "Do not know" in the "Missing data" category. <sup>4</sup> Includes syphilis, genital herpes, gonorrhoea, HIV (positive test), genital warts, Chlamydia, genital ulcer, others. <sup>5</sup> Excludes ever had genital warts in the adjustment.

STROBE Statement—Checklist of items that should be included in reports of *cross-sectional studies*

|                              | Item No | Recommendation                                                                                                                                                                                    | Reported on page # |
|------------------------------|---------|---------------------------------------------------------------------------------------------------------------------------------------------------------------------------------------------------|--------------------|
| <b>Title and abstract</b>    | 1       | (a) Indicate the study's design with a commonly used term in the title or the abstract                                                                                                            | 1                  |
|                              |         | (b) Provide in the abstract an informative and balanced summary of what was done and what was found                                                                                               | 3                  |
| <b>Introduction</b>          |         |                                                                                                                                                                                                   |                    |
| Background/rationale         | 2       | Explain the scientific background and rationale for the investigation being reported                                                                                                              | 5                  |
| Objectives                   | 3       | State specific objectives, including any prespecified hypotheses                                                                                                                                  | 5                  |
| <b>Methods</b>               |         |                                                                                                                                                                                                   |                    |
| Study design                 | 4       | Present key elements of study design early in the paper                                                                                                                                           | 6                  |
| Setting                      | 5       | Describe the setting, locations, and relevant dates, including periods of recruitment, exposure, follow-up, and data collection                                                                   | 6                  |
| Participants                 | 6       | (a) Give the eligibility criteria, and the sources and methods of selection of participants                                                                                                       | 6                  |
| Variables                    | 7       | Clearly define all outcomes, exposures, predictors, potential confounders, and effect modifiers. Give diagnostic criteria, if applicable                                                          |                    |
| Data sources/<br>measurement | 8*      | For each variable of interest, give sources of data and details of methods of assessment (measurement). Describe comparability of assessment methods if there is more than one group              |                    |
| Bias                         | 9       | Describe any efforts to address potential sources of bias                                                                                                                                         |                    |
| Study size                   | 10      | Explain how the study size was arrived at                                                                                                                                                         | 6                  |
| Quantitative variables       | 11      | Explain how quantitative variables were handled in the analyses. If applicable, describe which groupings were chosen and why                                                                      |                    |
| Statistical methods          | 12      | (a) Describe all statistical methods, including those used to control for confounding                                                                                                             | 7                  |
|                              |         | (b) Describe any methods used to examine subgroups and interactions                                                                                                                               | 7                  |
|                              |         | (c) Explain how missing data were addressed                                                                                                                                                       | 7                  |
|                              |         | (d) If applicable, describe analytical methods taking account of sampling strategy                                                                                                                | 7                  |
|                              |         | (e) Describe any sensitivity analyses                                                                                                                                                             | 7                  |
| <b>Results</b>               |         |                                                                                                                                                                                                   |                    |
| Participants                 | 13*     | (a) Report numbers of individuals at each stage of study—eg numbers potentially eligible, examined for eligibility, confirmed eligible, included in the study, completing follow-up, and analysed | 8                  |
|                              |         | (b) Give reasons for non-participation at each stage                                                                                                                                              | 8                  |
|                              |         | (c) Consider use of a flow diagram                                                                                                                                                                |                    |
| Descriptive data             | 14*     | (a) Give characteristics of study participants (eg demographic, clinical, social) and information on exposures and potential confounders                                                          | 8-10               |
|                              |         | (b) Indicate number of participants with missing data for each variable of interest                                                                                                               |                    |
| Outcome data                 | 15*     | Report numbers of outcome events or summary measures                                                                                                                                              |                    |
| Main results                 | 16      | (a) Give unadjusted estimates and, if applicable, confounder-adjusted estimates and their precision (eg, 95% confidence interval). Make clear                                                     | 10-16              |

1  
2  
3  
4  
5  
6  
7  
8  
9  
10  
11  
12  
13  
14  
15  
16  
17  
18  
19  
20  
21  
22  
23  
24  
25  
26  
27  
28  
29  
30  
31  
32  
33  
34  
35  
36  
37  
38  
39  
40  
41  
42  
43  
44  
45  
46  
47  
48  
49  
50  
51  
52  
53  
54  
55  
56  
57  
58  
59  
60

|                          |    |                                                                                                                                                                            |    |
|--------------------------|----|----------------------------------------------------------------------------------------------------------------------------------------------------------------------------|----|
|                          |    | which confounders were adjusted for and why they were included                                                                                                             |    |
|                          |    | (b) Report category boundaries when continuous variables were categorized                                                                                                  |    |
|                          |    | (c) If relevant, consider translating estimates of relative risk into absolute risk for a meaningful time period                                                           |    |
| Other analyses           | 17 | Report other analyses done—eg analyses of subgroups and interactions, and sensitivity analyses                                                                             |    |
| <b>Discussion</b>        |    |                                                                                                                                                                            |    |
| Key results              | 18 | Summarise key results with reference to study objectives                                                                                                                   | 17 |
| Limitations              | 19 | Discuss limitations of the study, taking into account sources of potential bias or imprecision. Discuss both direction and magnitude of any potential bias                 | 22 |
| Interpretation           | 20 | Give a cautious overall interpretation of results considering objectives, limitations, multiplicity of analyses, results from similar studies, and other relevant evidence | 22 |
| Generalisability         | 21 | Discuss the generalisability (external validity) of the study results                                                                                                      |    |
| <b>Other information</b> |    |                                                                                                                                                                            |    |
| Funding                  | 22 | Give the source of funding and the role of the funders for the present study and, if applicable, for the original study on which the present article is based              | 27 |

\*Give information separately for exposed and unexposed groups.

**Note:** An Explanation and Elaboration article discusses each checklist item and gives methodological background and published examples of transparent reporting. The STROBE checklist is best used in conjunction with this article (freely available on the Web sites of PLoS Medicine at <http://www.plosmedicine.org/>, Annals of Internal Medicine at <http://www.annals.org/>, and Epidemiology at <http://www.epidem.com/>). Information on the STROBE Initiative is available at [www.strobe-statement.org](http://www.strobe-statement.org).

# BMJ Open

## PREVALENCE AND GENOTYPE DISTRIBUTION OF CERVICAL HUMAN PAPILOMAVIRUS INFECTION IN THE PRE-VACCINATION ERA: A POPULATION-BASED STUDY IN THE CANARY ISLANDS

|                               |                                                                                                                                                                                                                                                                                                                                                                                                                                                                                                                                                                                                                                                                                                                                                                                                                                                                                                                                                                                                                                                                                                                                                                                                                                                                                                                                                                                                                                                                                                                                                                                                                                                                                                                                                                                                                                                                                                                                                                                                                                                                                                                                                                                                   |
|-------------------------------|---------------------------------------------------------------------------------------------------------------------------------------------------------------------------------------------------------------------------------------------------------------------------------------------------------------------------------------------------------------------------------------------------------------------------------------------------------------------------------------------------------------------------------------------------------------------------------------------------------------------------------------------------------------------------------------------------------------------------------------------------------------------------------------------------------------------------------------------------------------------------------------------------------------------------------------------------------------------------------------------------------------------------------------------------------------------------------------------------------------------------------------------------------------------------------------------------------------------------------------------------------------------------------------------------------------------------------------------------------------------------------------------------------------------------------------------------------------------------------------------------------------------------------------------------------------------------------------------------------------------------------------------------------------------------------------------------------------------------------------------------------------------------------------------------------------------------------------------------------------------------------------------------------------------------------------------------------------------------------------------------------------------------------------------------------------------------------------------------------------------------------------------------------------------------------------------------|
| Journal:                      | <i>BMJ Open</i>                                                                                                                                                                                                                                                                                                                                                                                                                                                                                                                                                                                                                                                                                                                                                                                                                                                                                                                                                                                                                                                                                                                                                                                                                                                                                                                                                                                                                                                                                                                                                                                                                                                                                                                                                                                                                                                                                                                                                                                                                                                                                                                                                                                   |
| Manuscript ID                 | bmjopen-2020-037402.R1                                                                                                                                                                                                                                                                                                                                                                                                                                                                                                                                                                                                                                                                                                                                                                                                                                                                                                                                                                                                                                                                                                                                                                                                                                                                                                                                                                                                                                                                                                                                                                                                                                                                                                                                                                                                                                                                                                                                                                                                                                                                                                                                                                            |
| Article Type:                 | Original research                                                                                                                                                                                                                                                                                                                                                                                                                                                                                                                                                                                                                                                                                                                                                                                                                                                                                                                                                                                                                                                                                                                                                                                                                                                                                                                                                                                                                                                                                                                                                                                                                                                                                                                                                                                                                                                                                                                                                                                                                                                                                                                                                                                 |
| Date Submitted by the Author: | 08-Apr-2020                                                                                                                                                                                                                                                                                                                                                                                                                                                                                                                                                                                                                                                                                                                                                                                                                                                                                                                                                                                                                                                                                                                                                                                                                                                                                                                                                                                                                                                                                                                                                                                                                                                                                                                                                                                                                                                                                                                                                                                                                                                                                                                                                                                       |
| Complete List of Authors:     | <p>ANDUJAR, MIGUEL; Complejo Hospitalario Universitario Insular Materno Infantil, Pathology</p> <p>ROURA, ESTHER; Catalan Institute of Oncology, Unit of Infections and Cancer - Information and Interventions (UNIC-I&amp;I) - Cancer Epidemiology Research Program (CERP) - Institut d'Investigació Biomèdica de Bellvitge (IDIBELL); Centro de Investigación Biomédica en Red de Epidemiología y Salud Pública (CIBERESP)</p> <p>TORRES, ALEJANDRA; Complejo Hospitalario Universitario Insular Materno Infantil, Department of Obstetrics and Gynecology</p> <p>VEGA, BEGOÑA; Complejo Hospitalario Universitario Insular Materno Infantil, Department of Obstetrics and Gynecology</p> <p>PAVCOVICH, MARTA; Complejo Hospitalario Universitario Insular Materno Infantil, Pathology</p> <p>SANCHEZ, MIGUEL ANGEL; Complejo Hospitalario Universitario Insular Materno Infantil, Pathology</p> <p>LUBRANO, AMINA; Complejo Hospitalario Universitario Insular Materno Infantil, Obstetrics and Gynecology</p> <p>TRUJILLO, JOSE LUIS; Hospital Universitario de Canarias, Obstetrics and Gynecology</p> <p>ALMEIDA, LUCIA; Hospital Universitario Nuestra Señora de la Candelaria, Obstetrics and Gynecology</p> <p>SANTANA, MILAGROS; Complejo Hospitalario Universitario Insular Materno Infantil, Pathology</p> <p>HURTADO, ROSAURA; Complejo Hospitalario Universitario Insular Materno Infantil, Obstetrics and Gynecology</p> <p>ARENCIBIA, OCTAVIO; Complejo Hospitalario Universitario Insular Materno Infantil, Obstetrics and Gynecology</p> <p>BENITO, VIRGINIA; Complejo Hospitalario Universitario Insular Materno Infantil, Obstetrics and Gynecology</p> <p>MEDINA, NORBERTO; Complejo Hospitalario Universitario Insular Materno Infantil, Obstetrics and Gynecology</p> <p>CARBALLO, SONIA; Complejo Hospitalario Universitario Insular Materno Infantil, Obstetrics and Gynecology</p> <p>CAMACHO, MARIA DEL CARMEN; Complejo Hospitalario Universitario Insular Materno Infantil, Pathology</p> <p>RUIZ DEL POZO, ARANCHA; Complejo Hospitalario Universitario Insular Materno Infantil, Pathology</p> <p>QUESADA, ALFOSO; Hospital Universitario Nuestra Señora de la</p> |

|                                    |                                                                                                                                                                                                                                                                                                                                                                                                                                                                                                                                                                                                                                     |
|------------------------------------|-------------------------------------------------------------------------------------------------------------------------------------------------------------------------------------------------------------------------------------------------------------------------------------------------------------------------------------------------------------------------------------------------------------------------------------------------------------------------------------------------------------------------------------------------------------------------------------------------------------------------------------|
|                                    | Candelaria, Obstetrics and Gynecology<br>SALIDO, EDUARDO; Hospital Universitario de Canarias, Pathology<br>De Sanjosé, Silvia ; PATH, Reproductive Health Global Programme;<br>Catalan Institute of Oncology, Cancer Epidemiology Research Program<br>(CERP) - Institut d'Investigació Biomèdica de Bellvitge (IDIBELL)<br>Bruni, Laia; Catalan Institute of Oncology, Unit of Infections and Cancer<br>- Information and Interventions (UNIC-I&I) - Cancer Epidemiology<br>Research Program (CERP) - Institut d'Investigació Biomèdica de Bellvitge<br>(IDIBELL); Centro de Investigación Biomédica en Red de Cáncer<br>(CIBERONC) |
| <b>Primary Subject<br>Heading</b>: | Epidemiology                                                                                                                                                                                                                                                                                                                                                                                                                                                                                                                                                                                                                        |
| Secondary Subject Heading:         | Pathology, Obstetrics and gynaecology                                                                                                                                                                                                                                                                                                                                                                                                                                                                                                                                                                                               |
| Keywords:                          | CYTOPATHOLOGY, Gynaecological oncology < GYNAECOLOGY,<br>EPIDEMIOLOGY, INFECTIOUS DISEASES                                                                                                                                                                                                                                                                                                                                                                                                                                                                                                                                          |
|                                    |                                                                                                                                                                                                                                                                                                                                                                                                                                                                                                                                                                                                                                     |

SCHOLARONE™  
Manuscripts



I, the Submitting Author has the right to grant and does grant on behalf of all authors of the Work (as defined in the below author licence), an exclusive licence and/or a non-exclusive licence for contributions from authors who are: i) UK Crown employees; ii) where BMJ has agreed a CC-BY licence shall apply, and/or iii) in accordance with the terms applicable for US Federal Government officers or employees acting as part of their official duties; on a worldwide, perpetual, irrevocable, royalty-free basis to BMJ Publishing Group Ltd ("BMJ") its licensees and where the relevant Journal is co-owned by BMJ to the co-owners of the Journal, to publish the Work in this journal and any other BMJ products and to exploit all rights, as set out in our [licence](#).

The Submitting Author accepts and understands that any supply made under these terms is made by BMJ to the Submitting Author unless you are acting as an employee on behalf of your employer or a postgraduate student of an affiliated institution which is paying any applicable article publishing charge ("APC") for Open Access articles. Where the Submitting Author wishes to make the Work available on an Open Access basis (and intends to pay the relevant APC), the terms of reuse of such Open Access shall be governed by a Creative Commons licence – details of these licences and which [Creative Commons](#) licence will apply to this Work are set out in our licence referred to above.

Other than as permitted in any relevant BMJ Author's Self Archiving Policies, I confirm this Work has not been accepted for publication elsewhere, is not being considered for publication elsewhere and does not duplicate material already published. I confirm all authors consent to publication of this Work and authorise the granting of this licence.



1 PREVALENCE AND GENOTYPE DISTRIBUTION OF CERVICAL HUMAN PAPILOMAVIRUS  
2 INFECTION IN THE PRE-VACCINATION ERA: A POPULATION-BASED STUDY IN THE  
3 CANARY ISLANDS  
4  
5

6 M Andújar<sup>1#</sup>, E Roura<sup>2,3</sup>, A Torres<sup>4</sup>, B Vega<sup>4</sup>, M Pavcovich<sup>1</sup>, MA Sánchez<sup>1</sup>, A Lubrano<sup>4</sup>, JL  
7 Trujillo<sup>5</sup>, L Almeida<sup>6</sup>, M Santana<sup>1</sup>, R Hurtado<sup>4</sup>, O Arencibia<sup>4</sup>, V Benito<sup>4</sup>, N Medina<sup>4</sup>, S  
8 Carballo<sup>4</sup>, MC Camacho<sup>1</sup>, A Ruiz-del-Pozo<sup>1</sup>, A Quesada<sup>6</sup>, E Salido<sup>7</sup>, S de Sanjosé<sup>3,8</sup>, L  
9 Bruni<sup>2,9</sup>, and the HPV Canary Study Group \*.  
10  
11  
12  
13  
14

15  
16 <sup>1#</sup> Corresponding author: Department of Pathology. Complejo Hospitalario  
17 Universitario Insular Materno Infantil, Avd. Marítima del Sur s/n. 35016. La Palmas de  
18 Gran Canaria, Spain. 34-28-308666. [mandsan@gobiernodecanarias.org](mailto:mandsan@gobiernodecanarias.org).  
19

20  
21 <sup>1</sup> Department of Pathology. Complejo Hospitalario Universitario Insular Materno  
22 Infantil, La Palmas de Gran Canaria, Spain.  
23

24  
25 <sup>2</sup> Unit of Infections and Cancer - Information and Interventions (UNIC-I&I) - Cancer  
26 Epidemiology Research Program (CERP), Catalan Institute of Oncology (ICO) –Institut  
27 d'Investigació Biomèdica de Bellvitge (IDIBELL), L'Hospitalet de Llobregat, Barcelona,  
28 Spain.  
29

30  
31 <sup>3</sup> Centro de Investigación Biomédica en Red de Epidemiología y Salud Pública  
32 (CIBERESP), Madrid, Spain.  
33

34  
35 <sup>4</sup> Department of Obstetrics and Gynecology. Complejo Hospitalario Universitario  
36 Insular Materno Infantil, La Palmas de Gran Canaria, Spain.  
37

38  
39 <sup>5</sup> Department of Obstetrics and Gynecology. Hospital Universitario de Canarias, La  
40 Laguna, Tenerife, Spain.  
41

42  
43 <sup>6</sup> Department of Obstetrics and Gynecology. Hospital Nuestra Señora de la Candelaria,  
44 Santa Cruz de Tenerife, Tenerife, Spain.  
45

46  
47 <sup>7</sup> Department of Pathology. Hospital Universitario de Canarias, La Laguna, Tenerife,  
48 Spain.  
49

50  
51 <sup>8</sup> Cancer Epidemiology Research Program (CERP), Catalan Institute of Oncology (ICO) –  
52 Institut d'Investigació Biomèdica de Bellvitge (IDIBELL), L'Hospitalet de Llobregat,  
53 Barcelona, Spain.  
54

55  
56 <sup>9</sup> Centro de Investigación Biomédica en Red de Cáncer (CIBERONC), Madrid, Spain.  
57  
58  
59  
60

1 HPV Canary Study Group:  
2  
3

4 • **GRAN CANARIA TEAM**

5  
6 Diana Alemán  
7 Mónica Almeida  
8 Ana María Arencibia  
9 María Isabel Armas  
10 Guillermina Batista  
11 Victoria Bernal  
12 Francisca Bernaldo de Quirós  
13 Sili Bolaños  
14 Dolores Casaña  
15 Luisa Celedón  
16 Isabel Cruz  
17 Elisa Díaz  
18 Inocencia Duarte  
19 Felisa Expósito  
20 Carmelo Felipe  
21 Carlos Galván  
22 María José García  
23 María Isabel García  
24 Vanesa García  
25 Virginia García  
26 Elena Giménez  
27 Teresa Godoy  
28 Catalina Gómez  
29 Lucía González  
30 Luisa Gutiérrez  
31 Mónica Hernández  
32 Delia Herrera  
33 Laura Herrera  
34 Rosario Laseca  
35  
36  
37

Carmen Marrero  
Ofelia Marrero  
Noa Mateos  
Olivia Medina  
Josefa Mendoza  
Lucia Montesdeoca  
Rosa Monzón  
Cristina Morales  
Mercedes Morales  
M<sup>a</sup> Dolores Navarro  
María Ángeles Nieto  
Noelia Pérez  
Yurena Pérez  
Antonio Ramos  
Antonio Rico  
Margarita Roldán  
Esther Salamanca  
Rosario Sánchez  
Raquel Santana  
Elvira Santos  
Antonia Solanes  
Elisabeth Soutto  
Dulce Suarez  
María Jesús Suárez  
María Ángeles Tadeo  
Virgen Valdés  
Gabriela Valido  
Irala Vega  
María del Pino Vega

38 • **TENERIFE TEAM**

39  
40 María Angeles Afonso  
41 Elisa Baena  
42 María Pilar Baz  
43 José de Armas  
44 Alicia de la Puerta  
45 Josefina García  
46 María Asuncion González  
47 Célida González  
48 María Teresa Hernández  
49 Josefa Limiñana  
50 Carmen Rosa León  
51 Fernando Marín  
52 Emma Manrique  
53 José Roberto Negrín  
54 Rosa Olavarrieta  
55 Verónica Perera  
56 Concepción Sabater  
57 Candelaria Sosvilla  
58  
59  
60

## ABSTRACT

Keywords: epidemiology, infectious diseases, human papillomavirus, cervical cancer, prevalence.

### Objective

National Spanish studies show that prevalence of cervical Human Papillomavirus (HPV) infection in the female population is increasingly frequent, with an overall estimate of 14% in women aged 18-65 years. The objective of this study is to know the prevalence and distribution of HPV types in the female population of the Canary Islands prior to the introduction of HPV vaccines and to investigate the associated clinical and socio-demographic factors.

### Methods

Based on the Primary Health Care database, a sample of adult women (18-65 years) of Gran Canaria (GC) and Tenerife (TF) stratified into nine age groups was carried out between 2002-2007. Women were contacted by postal letter and telephone call and were visited in their primary care center. A clinical-epidemiological survey was completed and cervical samples were taken for cytological study and HPV detection. HPV prevalence and its 95% confidence interval were estimated, and multivariate analyzes were performed using logistic regression to identify factors associated with the infection.

### Results

6,010 women participated in the study, 3,847 from GC and 2,163 from TF. The overall prevalence of HPV infection was 13.6% (12.8-14.5%) and 11.1% (10.3-11.9%) for high-risk types. The most frequent HPV type was 16 followed by types 51, 53, 31, 42 and 59. HPV types included in the nonavalent vaccine were detected in 54.1% of infected women. Factors associated with an increased risk of infection were: young ages (18-29 years), the number of sexual partners throughout life, not being married, being a smoker, and having had previous cervical lesions or genital warts.

### Conclusions

It is confirmed that prevalence of HPV infection in the female population of the Canary Islands is high, but similar to that of Spain, being HPV 16 the most frequent genotype. The determinants of infection are consistent with those of other populations.

1  
2  
3  
4 ***Strengths and limitations of this study:***  
5

- 6
- 7 • This is the first prevalence study of HPV infection in Canary Islands.
  - 8
  - 9 • The study design is population-based, including the main healthcare centers of the  
10 participant regions.  
11
  - 12
  - 13 • Cytological and molecular samples were analyzed in the same laboratory by the same  
14 staff, using highly-sensitive and partially automated techniques that ensured  
15 consistency, homogeneity and reproducibility of diagnostic methods.  
16
  - 17
  - 18 • Study recruitment time was extensive, from three to six years depending on the  
19 region.  
20
  - 21
  - 22 • Characteristics of the study participants could be different over time.  
23  
24  
25  
26  
27  
28  
29  
30  
31  
32  
33  
34  
35  
36  
37  
38  
39  
40  
41  
42  
43  
44  
45  
46  
47  
48  
49  
50  
51  
52  
53  
54  
55  
56  
57  
58  
59  
60

## 1. INTRODUCTION

Cervical cancer is the fourth most common female cancer worldwide and the second most frequent among young women aged 15-44 years, with an estimated 569,847 new cases in 2018.<sup>1</sup> In Spain, cervical cancer is the fifteenth most frequent cancer in women (fourth in women aged 15-44 years), with an estimated 1,942 new cases in 2018.<sup>1</sup> In the Canary Islands autonomous community, 356 new cases were diagnosed in 2008-2011, with a crude rate of 10.1 cases per 100,000 women,<sup>2</sup> one of the highest incidence rates in Spain.<sup>3</sup>

Human papillomavirus (HPV) is a necessary but not sufficient cause of cervical cancer.<sup>4</sup> More than 200 HPV genotypes are currently known, epidemiologically classified into low-oncogenic risk (LR-HPV) and high-oncogenic risk (HR-HPV) types.<sup>5</sup> HR-HPV types include 16 and 18 genotypes, present in more than 70% of cervical cancer cases<sup>6</sup> and included in the three prophylactic HPV vaccines currently commercialized.<sup>7,8</sup>

No robust estimations of HPV infection prevalence are available for the Canary Islands, which hinders comparisons with the rest of Spain. Changes in Spanish women's sexual behavior in the last decades have leads to increased HPV infection rates (up to 14% in 18-65 years old women, 29% of them in women younger than 25 years).<sup>9</sup> Baseline prevalence estimations of HPV infection and the genotype distributions are essential to monitor the impact of HPV-vaccination campaigns. Therefore, the goal of this study was to estimate the prevalence and distribution of HPV types in the female population of the Canary Islands before introducing HPV vaccination, as well as to study the clinical and socio-demographic factors associated to HPV infection.

## 2. METHODS

### 2.1. Participants

The study was conducted between 2002 and 2007 on a sample of 18-65 years-old-women living in any of the two most populated Canarian Islands: Gran Canaria and Tenerife. Participants were randomly selected from the regional Health Administration databases, stratified and selected with a probability proportional to the different healthcare areas on both islands. Selected women were stratified into nine age groups (18-24, 25-29, 30-34, 35-39, 40-44, 45-49, 50-54, 55-59 and 60-65 years). The initial sample included 2,276 women. For each age group, four reserve groups were obtained to supply the absences or refusals to participate. Participants were contacted by letter and a subsequent telephone call. A visit to the nearest healthcare center was scheduled. A total of 24,345 letters were sent, 15,577 in Gran Canaria and 8,768 in Tenerife, of which 23.3% agreed to participate. Women who did not attend the visit were recalled by phone to schedule another visit. Subsequently, a group of 934 women from Gran Canaria asked to participate in the study (volunteers) of which 665 finally attended the arranged appointment. This study was favorably evaluated by the Ethics and Clinical Trial Committee of our hospital Complejo Hospitalario Universitario Insular Materno Infantil.

### 2.2. Patient and Public Involvement

No patients or the public were involved in the design, or conduct, or dissemination of this study.

### 2.3. Procedures

1 Participants were asked to fulfill an informed consent form and to complete a clinical  
2  
3 and epidemiological questionnaire (adapted from IARC surveys). For cytological  
4  
5 collection, the wooden Ayre spatula and endocervical brush (cytobrush) were used,  
6  
7 stained with the Papanicolaou technique and the cytological diagnosis was made by a  
8  
9 single pathologist according to the criteria of the Bethesda system. For the molecular  
10  
11 study, a sterile cotton-tipped polystyrene swab without culture medium (Deltalab®,  
12  
13 Spain) was used. The obtained cell pellet was subjected to enzymatic digestion with  
14  
15 stirring for 2 hours at 55° C with proteinase K following the inactivation of the process  
16  
17 with incubation for 10 minutes at 90° C and subsequent centrifugation, obtaining DNA  
18  
19 from the sample supernatant.  
20  
21  
22  
23  
24  
25  
26  
27

28 To detect HPV infection, two separated polymerase chain reactions (PCR) were  
29  
30 conducted: one using My09/My11 consensus primer and the other using Gp5+/Gp6+  
31  
32 consensus primer. DNA quality was evaluated by PCR testing for the  $\beta$ -globin gene.  
33  
34 Samples that were negative for both HPV DNA and  $\beta$ -globin were excluded from the  
35  
36 final analysis. Samples showing positive results for any of the HPV PCR reactions or any  
37  
38 cytological alteration (Atypical Squamous cells of Undetermined Significance (ASCUS)  
39  
40 or higher) were genotyped using the Linear Array® HPV Genotyping Test (CE-IVD;  
41  
42 Roche Diagnostics®) or the INNO-LIPA HPV Genotyping Extra Amp kit  
43  
44 (Immugenetics®, Belgium - FUJIREBIO Europe, Belgium).  
45  
46  
47  
48  
49  
50  
51  
52

#### 53 2.4. Statistical analyses

54  
55 Descriptive analysis of socio-demographic variables was conducted, globally and  
56  
57 stratified according to the study subpopulation (i.e. selected participants from Gran  
58  
59 Canaria, volunteers from Gran Canaria, selected participants from Tenerife). Estimated  
60

1 HPV infection prevalence and genotype distribution and corresponding 95%  
2 confidence intervals (CI95%) were calculated as the number of HPV positive women  
3 among the total number of women tested for each age group, study subpopulation  
4 and cytological outcome (normal, abnormal). For each genotype, estimated  
5 prevalences were calculated independently including the presence of a given type  
6 either as a single type or in combination with others (multiple infections). Multivariate  
7 analysis was conducted using basic and adjusted logistic regression models in order to  
8 assess potential risk factors associated to infections by any HPV type and by HR types.  
9 Variables were introduced one by one into a basic regression model adjusted for age  
10 group and subpopulation. Variables showing statistically significant association (p-  
11 value < 0.05) were kept as adjustment variables in the final model. Statistical analysis  
12 was carried out with the R software (R Development Core Team, 2005, [http://www.r-  
13 project.org](http://www.r-project.org)).

## 34 **RESULTS**

### 35 ***Study population***

36 Table 1 shows the characteristics of the study population. A total of 6,091 women  
37 were included: 3,212 selected from the general Gran Canaria population (52.7%), 665  
38 volunteers from Gran Canaria (10.9%) and 2,214 selected from Tenerife (36.3%). Up to  
39 8.4% of participants were not born in Spain and came mostly from Latin American  
40 countries (5.4%); participants' mean age was 40.7 years; 64.4% were married at  
41 recruitment; 77.5% had been pregnant at least once and the mean number of children  
42 was 2.2. Regarding cytology screening, 53.7% of subjects had undergone more than 5  
43 cytological studies in their lives, while 3.5% of them had never undergone one.  
44 Regarding HPV infection related epidemiological factors, 56.5% of subjects were non-



smokers and 28.5% were smokers at recruitment; 53.9% of subjects had only one sexual partner; and 47.3% were younger than 19 years at sexual first intercourse. Demographic characteristics were slightly different between both islands: education level, proportion of smokers and number of sexual partners were statistically higher in Tenerife than in Gran Canaria. Regarding the subgroup of Gran Canaria volunteers, they were younger, with a high level of education, more divorced or separated, ex-smokers and with more previous cervical pap smears compared with the general population of the island (Supplementary Table 1).

**Table 1 – Characteristics of the study participants (n=6,091 women).**

| Study sample characteristics      | N (%)        |
|-----------------------------------|--------------|
| <b>Distribution by population</b> |              |
| Gran Canaria (general population) | 3,212 (52.7) |
| Gran Canaria (volunteers)         | 665 (10.9)   |
| Tenerife                          | 2,214 (36.3) |
| <b>Country of birth</b>           |              |
| Spain                             | 5,397 (91.6) |
| Europe (excluding Spain)          | 111 (1.9)    |
| Northern Africa                   | 20 (0.3)     |
| Sub-Saharan Africa                | 15 (0.3)     |
| Latin America and Caribbean       | 318 (5.4)    |
| Asia and Oceania                  | 30 (0.5)     |
| Missing data                      | 200 (-)      |
| <b>Age distribution (years)</b>   |              |
| 18-24                             | 572 (9.4)    |
| 25-29                             | 663 (10.9)   |
| 30-34                             | 905 (14.9)   |
| 35-39                             | 902 (14.8)   |
| 40-44                             | 793 (13.0)   |
| 45-49                             | 631 (10.4)   |
| 50-54                             | 613 (10.1)   |
| 55-59                             | 502 (8.2)    |
| 60-65                             | 510 (8.4)    |
| <b>Marital status</b>             |              |
| Single                            | 1,396 (22.9) |
| Married/de facto partnership      | 3,919 (64.4) |
| Divorced/separated                | 573 (9.4)    |
| Widowed                           | 195 (3.2)    |
| Missing data                      | 8 (-)        |
| <b>Pregnancies</b>                |              |
| No                                | 1,343 (22.5) |
| Yes                               | 4,613 (77.5) |

|    |                                                |                             |              |
|----|------------------------------------------------|-----------------------------|--------------|
| 1  |                                                | Missing data                | 135 (-)      |
| 2  | <b>Number of live births <sup>1</sup></b>      |                             |              |
| 3  |                                                | 0                           | 28 (0.7)     |
| 4  |                                                | 1                           | 1,237 (28.7) |
| 5  |                                                | 2                           | 1,786 (41.5) |
| 6  |                                                | 3                           | 789 (18.3)   |
| 7  |                                                | 4                           | 277 (6.4)    |
| 8  |                                                | ≥5                          | 186 (4.3)    |
| 9  |                                                | Missing data                | 310 (-)      |
| 10 | <b>Sexually transmitted disease</b>            |                             |              |
| 11 |                                                | Never                       | 5,882 (96.6) |
| 12 |                                                | Ever <sup>2</sup>           | 209 (3.4)    |
| 13 |                                                | Syphilis <sup>3</sup>       | 30 (0.5)     |
| 14 |                                                | Genital herpes <sup>3</sup> | 51 (0.8)     |
| 15 |                                                | Gonorrhoea <sup>3</sup>     | 23 (0.4)     |
| 16 |                                                | HIV <sup>3</sup>            | 7 (0.1)      |
| 17 |                                                | Genital warts <sup>3</sup>  | 120 (2.0)    |
| 18 |                                                | Chlamydia <sup>3</sup>      | 30 (0.5)     |
| 19 |                                                | Genital ulcer <sup>3</sup>  | 16 (0.3)     |
| 20 |                                                | Others <sup>3</sup>         | 72 (1.2)     |
| 21 | <b>Smoking status</b>                          |                             |              |
| 22 |                                                | Never smoked                | 3,443 (56.5) |
| 23 |                                                | Ex smoker                   | 913 (15.0)   |
| 24 |                                                | Current smoker              | 1,735 (28.5) |
| 25 | <b>Previous cervical pap smears</b>            |                             |              |
| 26 |                                                | None                        | 216 (3.5)    |
| 27 |                                                | 1                           | 493 (8.1)    |
| 28 |                                                | 2-3                         | 1,056 (17.3) |
| 29 |                                                | 4-5                         | 772 (12.7)   |
| 30 |                                                | >5                          | 3,273 (53.7) |
| 31 |                                                | Do not know                 | 281 (4.6)    |
| 32 | <b>Previous cervical lesions <sup>4</sup></b>  |                             |              |
| 33 |                                                | No                          | 4,837 (92.5) |
| 34 |                                                | Yes                         | 385 (7.4)    |
| 35 |                                                | Do not know                 | 5 (0.1)      |
| 36 |                                                | Missing data                | 648 (-)      |
| 37 | <b>Age at first sexual intercourse (years)</b> |                             |              |
| 38 |                                                | <15                         | 187 (3.1)    |
| 39 |                                                | 15-16                       | 828 (13.6)   |
| 40 |                                                | 17-18                       | 1,863 (30.6) |
| 41 |                                                | 19-20                       | 1,281 (21.0) |
| 42 |                                                | 21-25                       | 1,421 (23.3) |
| 43 |                                                | >25                         | 442 (7.3)    |
| 44 |                                                | Missing data                | 69 (-)       |
| 45 | <b>Lifetime number of sexual partners</b>      |                             |              |
| 46 |                                                | 1                           | 3,232 (53.9) |
| 47 |                                                | 2-3                         | 1,571 (26.2) |
| 48 |                                                | 4-5                         | 614 (10.2)   |
| 49 |                                                | 6-10                        | 405 (6.8)    |
| 50 |                                                | 11-20                       | 126 (2.1)    |
| 51 |                                                | >20                         | 49 (0.8)     |
| 52 |                                                | Missing data                | 94 (-)       |
| 53 | <b>Contraceptive methods used <sup>5</sup></b> |                             |              |

|   |                                  |              |
|---|----------------------------------|--------------|
| 1 | Oral contraceptives              | 4,664 (76.6) |
| 2 | IUD                              | 1,133 (18.6) |
| 3 | Condom                           | 4,522 (74.2) |
| 4 | Rhythm method/coitus interruptus | 3,049 (50.1) |
| 5 | Diaphragm/spermicide             | 234 (3.8)    |
| 6 | Injection/implant                | 253 (4.2)    |
| 7 | Tube ligation                    | 802 (13.2)   |
| 8 | Vasectomy                        | 549 (9.0)    |

11 <sup>1</sup> Among ever pregnant women (N=4,613). <sup>2</sup> Includes syphilis, genital herpes, gonorrhea, HIV (positive test), genital  
 12 warts, Chlamydia, genital ulcer, others. <sup>3</sup> Do not add the total of women because a woman could have more than  
 13 one sexually transmitted disease in lifetime. <sup>4</sup> Among women with a previous pap smear (N=5,875). <sup>5</sup> Do not add the  
 14 total of women because a woman can use more than one contraceptive in lifetime.  
 15  
 16  
 17  
 18

### 19 **Prevalence of cervical HPV infection**

20 For the prevalence study, 6,010 women were included in the analysis after excluding  
 21  
 22 81 women due to poor DNA quality in their samples. Prevalence of any-type HPV  
 23 infection was 13.6% (CI95% 12.8-14.5) while the prevalence of HR-HPV infection was  
 24 11.1% (CI95% 10.3-11.9) (Table 2). The youngest age group (18-24 years) showed the  
 25 highest prevalence with 26.7% of any-type HPV infection (CI95% 23.1-30.4). Prevalence  
 26 progressively decreased with increasing age, although the two oldest groups (55-65  
 27 years) showed a slightly non-significant increase compared with the immediately  
 28 younger group (Figure 1).  
 29  
 30  
 31  
 32  
 33  
 34  
 35  
 36  
 37  
 38  
 39  
 40  
 41

42 **Table 2 – Prevalence of Human Papillomavirus (HPV) by age group for any type and**  
 43 **for any high-risk type (n=6,010 women).**

| 46 Age group (years) | 47 Number of tested women | 48 Number of HPV positive women | 49 Any HPV prevalence (%; 95% CI) | 50 Any HR HPV prevalence <sup>1</sup> (%; 95% CI) |
|----------------------|---------------------------|---------------------------------|-----------------------------------|---------------------------------------------------|
| 51 18-24             | 565                       | 151                             | 26.7 (23.1-30.4)                  | 23.9 (20.4-27.4)                                  |
| 52 25-29             | 655                       | 145                             | 22.1 (19.0-25.3)                  | 19.7 (16.6-22.7)                                  |
| 53 30-34             | 894                       | 161                             | 18.0 (15.5-20.5)                  | 15.2 (12.9-17.6)                                  |
| 54 35-39             | 890                       | 96                              | 10.8 (8.7-12.8)                   | 8.0 (6.2-9.8)                                     |
| 55 40-44             | 783                       | 79                              | 10.1 (8.0-12.2)                   | 8.6 (6.6-10.5)                                    |
| 56 45-49             | 622                       | 59                              | 9.5 (7.2-11.8)                    | 7.1 (5.1-9.1)                                     |
| 57 50-54             | 607                       | 43                              | 7.1 (5.0-9.1)                     | 4.9 (3.2-6.7)                                     |
| 58 55-59             | 495                       | 42                              | 8.5 (6.0-10.9)                    | 5.5 (3.5-7.5)                                     |
| 59 60-65             | 499                       | 44                              | 8.8 (6.3-11.3)                    | 5.8 (3.8-7.9)                                     |
| <b>Total</b>         | <b>6,010</b>              | <b>820</b>                      | <b>13.6 (12.8-14.5)</b>           | <b>11.1 (10.3-11.9)</b>                           |

HPV: Human Papillomavirus; HR: High-Risk; CI: Confidence Interval.

<sup>1</sup> HR HPV types includes high-risk types and possibly /probably high-risk types: 16, 18, 31, 33, 35, 39, 45, 51, 52, 56, 58, 59, 53, 66, 67, 68, 69, 69/71, 70, 73.

Although volunteers from Gran Canaria showed higher prevalence of any-type HPV infection than participants from the general population from both Gran Canaria (14.5%, CI95% 11.8-17.2, versus 12.7%, CI95% 11.6-13.9; Supplementary Table 2), the difference was not statistically significant. A comparison between the two populations from Gran Canaria (general population and volunteers) and the population from Tenerife showed statistically significant differences in HR-HPV infection prevalence (10.6%, CI95% 9.6-11.6, versus 12.1%, CI95% 10.7-13.4,  $p=0.002$ ; Supplementary Table 2).

Table 3 shows the distribution of the most frequent HPV genotypes. Single-type HPV infection was detected in 6% of subjects and multiple infections in 7.2% (corresponding to 43.8% and 52.8% of all HPV-positive women respectively). Among HR-HPV types, type 16 was the most frequent one found in 27.8% of positive women (including both single and multiple HPV types), followed by types 51 (13.7%), 53 (13.3%), 59 (9.9%), 31 (8.5%), 52 (7.7%) and 18 (6.1%).

**Table 3 – Human Papillomavirus (HPV) type-specific distribution of the most common types (n=6,010 women).**

| HPV type                               | Number of HPV positive women (n=820) | HPV prevalence among all women (n=6,010) (%; 95% CI) | HPV prevalence among positive women (n=820) (%; 95% CI) |
|----------------------------------------|--------------------------------------|------------------------------------------------------|---------------------------------------------------------|
| <b>Single types</b>                    | <b>359</b>                           | <b>6.0 (5.4-6.6)</b>                                 | <b>43.8 (40.4-47.2)</b>                                 |
| <b><i>HR HPV types</i><sup>1</sup></b> |                                      |                                                      |                                                         |
| 16                                     | 75                                   | 1.2 (1.0-1.5)                                        | 9.1 (7.2-11.1)                                          |
| 51                                     | 34                                   | 0.6 (0.4-0.8)                                        | 4.1 (2.8-5.5)                                           |
| 53                                     | 28                                   | 0.5 (0.3-0.6)                                        | 3.4 (2.2-4.7)                                           |

|    |                                   |                 |            |                            |                            |
|----|-----------------------------------|-----------------|------------|----------------------------|----------------------------|
| 1  |                                   | 31              | 16         | 0.3 (0.1-0.4)              | 2.0 (1.0-2.9)              |
| 2  |                                   | 59              | 14         | 0.2 (0.1-0.4)              | 1.7 (0.8-2.6)              |
| 3  |                                   |                 |            |                            |                            |
| 4  |                                   | 33, 68, 70      | 11 each    | 0.2 (0.1-0.3) <sup>4</sup> | 1.3 (0.6-2.1) <sup>4</sup> |
| 5  |                                   | 66              | 10         | 0.2 (0.1-0.3)              | 1.2 (0.5-2.0)              |
| 6  |                                   |                 |            |                            |                            |
| 7  |                                   | 52, 58          | 9 each     | 0.1 (0.1-0.2) <sup>4</sup> | 1.1 (0.4-1.8) <sup>4</sup> |
| 8  |                                   | 18              | 8          | 0.1 (0.0-0.2)              | 1.0 (0.3-1.6)              |
| 9  |                                   | 56              | 7          | 0.1 (0.0-0.2)              | 0.9 (0.2-1.5)              |
| 10 |                                   |                 |            |                            |                            |
| 11 |                                   | 35, 39          | 5 each     | 0.1 (0.0-0.2) <sup>4</sup> | 0.6 (0.1-1.1) <sup>4</sup> |
| 12 |                                   | 73              | 4          | 0.1 (0.0-0.1)              | 0.5 (0.0-1.0)              |
| 13 |                                   | 45              | 3          | 0.0 (0.0-0.1)              | 0.4 (0.0-0.8)              |
| 14 |                                   | 67              | 2          | 0.0 (0.0-0.1)              | 0.2 (0.1-0.6)              |
| 15 |                                   |                 |            |                            |                            |
| 16 |                                   | 69, 69/71       | 1 each     | 0.0 (0.0-0.0) <sup>4</sup> | 0.1 (0.1-0.4) <sup>4</sup> |
| 17 | <b>LR HPV types <sup>2</sup></b>  |                 |            |                            |                            |
| 18 |                                   | 42              | 17         | 0.3 (0.1-0.4)              | 2.1 (1.1-3.0)              |
| 19 |                                   | 84              | 12         | 0.2 (0.1-0.3)              | 1.5 (0.6-2.3)              |
| 20 |                                   |                 |            |                            |                            |
| 21 |                                   | 62              | 11         | 0.2 (0.1-0.3)              | 1.3 (0.6-2.1)              |
| 22 |                                   | 61              | 10         | 0.2 (0.1-0.3)              | 1.2 (0.5-2.0)              |
| 23 |                                   |                 |            |                            |                            |
| 24 |                                   | 6, 55, 81       | 9          | 0.1 (0.1-0.2)              | 1.1 (0.4-1.8)              |
| 25 |                                   | 89              | 5          | 0.1 (0.0-0.2)              | 0.6 (0.1-1.1)              |
| 26 |                                   | 54              | 4          | 0.1 (0.0-0.1)              | 0.5 (0.0-1.0)              |
| 27 |                                   |                 |            |                            |                            |
| 28 |                                   | 11, 43, 72, 83  | 2 each     | 0.0 (0.0-0.1) <sup>4</sup> | 0.2 (0.1-0.6) <sup>4</sup> |
| 29 |                                   | 40              | 1          | 0.0 (0.0-0.0)              | 0.1 (0.1-0.4)              |
| 30 | <b>Untyped HPV</b>                |                 | <b>28</b>  | <b>0.5 (0.3-0.6)</b>       | <b>3.4 (2.2-4.7)</b>       |
| 31 | <b>Multiple types</b>             |                 | <b>433</b> | <b>7.2 (6.6-7.9)</b>       | <b>52.8 (49.4-56.2)</b>    |
| 32 |                                   |                 |            |                            |                            |
| 33 | <b>Number of multiple types</b>   |                 |            |                            |                            |
| 34 |                                   | 2 types         | 203        | 3.4 (2.9-3.8)              | 24.8 (21.8-27.7)           |
| 35 |                                   | 3 types         | 115        | 1.9 (1.6-2.3)              | 14.0 (11.6-16.4)           |
| 36 |                                   | 4 types         | 73         | 1.2 (0.9-1.5)              | 8.9 (7.0-10.9)             |
| 37 |                                   |                 |            |                            |                            |
| 38 |                                   | 5 or more types | 42         | 0.7 (0.5-0.9)              | 5.1 (3.6-6.6)              |
| 39 | <b>Most frequent combinations</b> |                 |            |                            |                            |
| 40 |                                   | 16 with others  | 153        | 2.5 (2.1-2.9)              | 18.7 (16-21.3)             |
| 41 |                                   | 53 with others  | 81         | 1.3 (1.1-1.6)              | 9.9 (7.8-11.9)             |
| 42 |                                   | 51 with others  | 78         | 1.3 (1.0-1.6)              | 9.5 (7.5-11.5)             |
| 43 |                                   | 59 with others  | 67         | 1.1 (0.8-1.4)              | 8.2 (6.3-10.0)             |
| 44 |                                   | 42 with others  | 59         | 1.0 (0.7-1.2)              | 7.2 (5.4-9.0)              |
| 45 |                                   | 31 with others  | 54         | 0.9 (0.7-1.1)              | 6.6 (4.9-8.3)              |
| 46 |                                   | 52 with others  | 54         | 0.9 (0.7-1.1)              | 6.6 (4.9-8.3)              |
| 47 |                                   | 66 with others  | 50         | 0.8 (0.6-1.1)              | 6.1 (4.5-7.7)              |
| 48 |                                   | 54 with others  | 48         | 0.8 (0.6-1.0)              | 5.9 (4.2-7.5)              |
| 49 |                                   | 62 with others  | 46         | 0.8 (0.5-1.0)              | 5.6 (4.0-7.2)              |
| 50 |                                   | 89 with others  | 46         | 0.8 (0.5-1.0)              | 5.6 (4.0-7.2)              |
| 51 |                                   | 61 with others  | 44         | 0.7 (0.5-0.9)              | 5.4 (3.8-6.9)              |
| 52 |                                   | 56 with others  | 43         | 0.7 (0.5-0.9)              | 5.2 (3.7-6.8)              |
| 53 |                                   | 18 with others  | 42         | 0.7 (0.5-0.9)              | 5.1 (3.6-6.6)              |
| 54 |                                   | 58 with others  | 42         | 0.7 (0.5-0.9)              | 5.1 (3.6-6.6)              |
| 55 |                                   |                 |            |                            |                            |
| 56 |                                   | 84 with others  | 38         | 0.6 (0.4-0.8)              | 4.6 (3.2-6.1)              |
| 57 |                                   |                 |            |                            |                            |
| 58 |                                   |                 |            |                            |                            |
| 59 |                                   |                 |            |                            |                            |
| 60 |                                   |                 |            |                            |                            |



### ***Cytopathological study and cervical HPV infection***

The cytological study yielded 317 pathological findings (5.3%) with 69.1% (CI95% 64.0-74.2) of HPV positivity versus 5,693 non-pathological cytologies (94.7%) with 10.6% (CI95% 9.8-11.4) of HPV positivity (Supplementary Table 4), 214 cases of ASCUS were detected (3.6%) with 60.7% of HPV positivity, 91 cases of low-grade squamous intraepithelial lesions (LSIL) (1.5%) with 86.8% of HPV positivity and 12 cases of high-grade squamous intraepithelial lesions or worse (HSIL+) (0.2%) with 83.3% of HPV positivity. Genotype 16 was the most frequently type found in these cytological alterations. Multiple infections were more frequent in women with LSIL or HSIL+ as compared with ASCUS (Supplementary Table 5).

### ***Cervical HPV infection and associated risk factors***

Considering all cases of cervical HPV infection (LR-HPV and HR-HPV) and according to the final adjusted model, the following statistically significant variables were detected in the association with HPV infection: younger ages (18-29 years, with a significant lineal trend), not married, smokers, more than one sexual partner (statistically significant trend), history of cervical alterations or genital warts, and practicing coitus interruptus (Table 4). When only cases of HR-HPV cervical infection were considered, the same variables showed statistical significance except for practicing coitus interruptus (Supplementary Table 6).

**Table 4 – Crude and multivariate analyses of the association between cervical Human Papillomavirus (HPV) infection and selected subjects' characteristics (n=6,010 women).**

| Study sample characteristics | Number of HPV positive | HPV prevalence | Basic model <sup>1</sup> POR (95% CI) | Adjusted model <sup>2</sup> POR (95% CI) |
|------------------------------|------------------------|----------------|---------------------------------------|------------------------------------------|
|------------------------------|------------------------|----------------|---------------------------------------|------------------------------------------|

|                                        |                                             | women /<br>number of<br>HPV tested<br>women | (%)  |                          |                          |
|----------------------------------------|---------------------------------------------|---------------------------------------------|------|--------------------------|--------------------------|
| <b>Population</b>                      |                                             |                                             |      |                          |                          |
|                                        | Gran Canaria                                | 501 / 3,847                                 | 13.0 | 1.0 (ref)                | 1.0 (ref)                |
|                                        | Tenerife                                    | 319 / 2,163                                 | 14.7 | 1.1 (0.98-1.3)           | 1.0 (0.8-1.1)            |
| <b>Country of birth</b>                |                                             |                                             |      |                          |                          |
|                                        | Spain                                       | 711 / 5,331                                 | 13.3 | 1.0 (ref)                | 1.0 (ref)                |
|                                        | Europe (excluding Spain)                    | 17 / 109                                    | 15.6 | 1.3 (0.8-2.2)            | 0.8 (0.5-1.5)            |
|                                        | Africa                                      | 8 / 33                                      | 24.2 | <b>2.7 (1.2-6.0)</b>     | 2.3 (0.99-5.4)           |
|                                        | Latin America and Caribbean                 | 51 / 309                                    | 16.5 | 1.3 (0.9-1.8)            | 1.2 (0.8-1.7)            |
|                                        | Asia and Oceania                            | 2 / 29                                      | 6.9  | 0.6 (0.1-2.5)            | 0.8 (0.2-3.5)            |
|                                        | Missing data                                | 31 / 199                                    | -    | -                        | -                        |
|                                        | Outside Spain (include all countries)       | 78 / 480                                    | 16.3 | <b>1.3 (1.0-1.7)</b>     | 1.1 (0.9-1.5)            |
| <b>Age distribution (years)</b>        |                                             |                                             |      |                          |                          |
|                                        | 18-24                                       | 151 / 565                                   | 26.7 | <b>3.8 (2.6-5.4)</b>     | <b>2.1 (1.3-3.2)</b>     |
|                                        | 25-29                                       | 145 / 655                                   | 22.1 | <b>3.0 (2.1-4.2)</b>     | <b>1.6 (1.0-2.4)</b>     |
|                                        | 30-34                                       | 161 / 894                                   | 18.0 | <b>2.3 (1.6-3.4)</b>     | 1.3 (0.9-2.0)            |
|                                        | 35-39                                       | 96 / 890                                    | 10.8 | 1.3 (0.9-1.8)            | 0.8 (0.5-1.2)            |
|                                        | 40-44                                       | 79 / 783                                    | 10.1 | 1.2 (0.8-1.7)            | 0.8 (0.5-1.2)            |
|                                        | 45-49                                       | 59 / 622                                    | 9.5  | 1.1 (0.7-1.7)            | 0.7 (0.5-1.1)            |
|                                        | 50-54                                       | 43 / 607                                    | 7.1  | 0.8 (0.5-1.2)            | <b>0.6 (0.4-0.9)</b>     |
|                                        | 55-59                                       | 42 / 495                                    | 8.5  | 1.0 (0.6-1.5)            | 0.8 (0.5-1.3)            |
|                                        | 60-65                                       | 44 / 499                                    | 8.8  | 1.0 (ref)                | 1.0 (ref)                |
|                                        | <i>p-value for trend</i>                    |                                             |      | <b><i>p</i>&lt;0.001</b> | <b><i>p</i>&lt;0.001</b> |
| <b>Level of education</b>              |                                             |                                             |      |                          |                          |
|                                        | None / Preschool                            | 40 / 449                                    | 8.9  | 1.0 (ref)                | 1.0 (ref)                |
|                                        | Primary                                     | 307 / 2,649                                 | 11.6 | 1.0 (0.7-1.5)            | 1.0 (0.7-1.4)            |
|                                        | Secondary                                   | 241 / 1,477                                 | 16.3 | 1.1 (0.8-1.6)            | 0.9 (0.6-1.3)            |
|                                        | University or higher                        | 213 / 1,331                                 | 16.0 | 1.2 (0.8-1.7)            | 0.9 (0.6-1.4)            |
|                                        | Others                                      | 18 / 95                                     | 18.9 | 1.2 (0.6-2.2)            | 1.1 (0.5-2.0)            |
|                                        | Missing data                                | 1 / 9                                       | -    | -                        | -                        |
|                                        | <i>p-value for trend (excluding others)</i> |                                             |      | <i>p</i> =0.2            | <i>p</i> =0.5            |
| <b>Marital status</b>                  |                                             |                                             |      |                          |                          |
|                                        | Single                                      | 329 / 1,379                                 | 23.9 | <b>2.0 (1.6-2.4)</b>     | <b>1.5 (1.2-1.9)</b>     |
|                                        | Married/de facto partnership                | 347 / 3,872                                 | 9.0  | 1.0 (ref)                | 1.0 (ref)                |
|                                        | Divorced/separated                          | 118 / 560                                   | 21.1 | <b>3.0 (2.4-3.8)</b>     | <b>1.8 (1.4-2.4)</b>     |
|                                        | Widowed                                     | 25 / 191                                    | 13.1 | <b>2.1 (1.3-3.2)</b>     | <b>1.7 (1.0-2.6)</b>     |
|                                        | Missing data                                | 1 / 8                                       | -    | -                        | -                        |
| <b>Number of live births</b>           |                                             |                                             |      |                          |                          |
|                                        | No <sup>3</sup>                             | 279 / 1,346                                 | 20.7 | 1.0 (ref)                | 1.0 (ref)                |
|                                        | 1                                           | 157 / 1,222                                 | 12.8 | <b>0.8 (0.6-0.9)</b>     | 0.8 (0.6-1.1)            |
|                                        | 2                                           | 171 / 1,760                                 | 9.7  | <b>0.7 (0.6-0.9)</b>     | 1.0 (0.7-1.3)            |
|                                        | 3                                           | 80 / 781                                    | 10.2 | 0.9 (0.6-1.2)            | 1.2 (0.8-1.7)            |
|                                        | ≥4                                          | 37 / 458                                    | 8.1  | 0.7 (0.5-1.1)            | 0.9 (0.6-1.4)            |
|                                        | Missing data                                | 96 / 443                                    | -    | -                        | -                        |
| <b>Smoking status</b>                  |                                             |                                             |      |                          |                          |
|                                        | Never smoked                                | 376 / 3,402                                 | 11.1 | 1.0 (ref)                | 1.0 (ref)                |
|                                        | Ex smoker                                   | 126 / 900                                   | 14.0 | <b>1.4 (1.1-1.7)</b>     | 1.2 (0.9-1.5)            |
|                                        | Current smoker                              | 318 / 1,708                                 | 18.6 | <b>1.7 (1.5-2.1)</b>     | <b>1.2 (1.0-1.5)</b>     |
| <b>Age at first sexual intercourse</b> |                                             |                                             |      |                          |                          |



|    |                                           |                           |             |      |                          |                          |
|----|-------------------------------------------|---------------------------|-------------|------|--------------------------|--------------------------|
| 1  | (years)                                   |                           |             |      |                          |                          |
| 2  |                                           | <15                       | 40 / 184    | 21.7 | 1.5 (0.95-2.5)           | 0.7 (0.4-1.2)            |
| 3  |                                           | 15-16                     | 166 / 817   | 20.3 | 1.4 (0.99-2.1)           | 0.8 (0.5-1.2)            |
| 4  |                                           | 17-18                     | 273 / 1,835 | 14.9 | 1.1 (0.8-1.6)            | 0.7 (0.5-1.1)            |
| 5  |                                           | 19-20                     | 143 / 1,266 | 11.3 | 0.9 (0.7-1.3)            | 0.7 (0.5-1.1)            |
| 6  |                                           | 21-25                     | 146 / 1,402 | 10.4 | 1.0 (0.7-1.4)            | 0.9 (0.6-1.3)            |
| 7  |                                           | >25                       | 45 / 437    | 10.3 | 1.0 (ref)                | 1.0 (ref)                |
| 8  |                                           | Missing data              | 7 / 69      | -    | -                        | -                        |
| 9  |                                           | <i>p-value for trend</i>  |             |      | <b><i>p=0.001</i></b>    | <i>p=0.3</i>             |
| 10 |                                           |                           |             |      |                          |                          |
| 11 | <b>Lifetime number of sexual partners</b> |                           |             |      |                          |                          |
| 12 |                                           | 1                         | 214 / 3,189 | 6.7  | 1.0 (ref)                | 1.0 (ref)                |
| 13 |                                           | 2-3                       | 274 / 1,545 | 17.7 | <b>2.7 (2.2-3.3)</b>     | <b>2.3 (1.9-2.8)</b>     |
| 14 |                                           | 4-5                       | 141 / 613   | 23.0 | <b>3.6 (2.8-4.6)</b>     | <b>2.8 (2.2-3.6)</b>     |
| 15 |                                           | 6-10                      | 119 / 395   | 30.1 | <b>5.3 (4.0-6.9)</b>     | <b>3.9 (2.9-5.2)</b>     |
| 16 |                                           | 11-20                     | 41 / 126    | 32.5 | <b>5.9 (3.9-8.8)</b>     | <b>4.2 (2.8-6.5)</b>     |
| 17 |                                           | >20                       | 18 / 49     | 36.7 | <b>8.1 (4.4-14.8)</b>    | <b>6.2 (3.3-11.5)</b>    |
| 18 |                                           | Missing data              | 13 / 93     | -    | -                        | -                        |
| 19 |                                           | <i>p-value for trend</i>  |             |      | <b><i>p&lt;0.001</i></b> | <b><i>p&lt;0.001</i></b> |
| 20 |                                           |                           |             |      |                          |                          |
| 21 | <b>Use of oral contraceptives</b>         |                           |             |      |                          |                          |
| 22 |                                           | Never                     | 164 / 1,404 | 11.7 | 1.0 (ref)                | 1.0 (ref)                |
| 23 |                                           | Ever                      | 656 / 4,606 | 14.2 | <b>1.2 (1.0-1.5)</b>     | 1.1 (0.9-1.4)            |
| 24 |                                           |                           |             |      |                          |                          |
| 25 | <b>Rhythm method/coitus interruptus</b>   |                           |             |      |                          |                          |
| 26 |                                           | Never                     | 381 / 2,998 | 12.7 | 1.0 (ref)                | 1.0 (ref)                |
| 27 |                                           | Ever                      | 439 / 3,012 | 14.6 | <b>1.3 (1.1-1.5)</b>     | <b>1.2 (1.0-1.4)</b>     |
| 28 |                                           |                           |             |      |                          |                          |
| 29 | <b>Previous cervical lesions</b>          |                           |             |      |                          |                          |
| 30 |                                           | No                        | 645 / 4,986 | 12.9 | 1.0 (ref)                | 1.0 (ref)                |
| 31 |                                           | Yes                       | 84 / 378    | 22.2 | <b>2.1 (1.6-2.7)</b>     | <b>1.6 (1.2-2.1)</b>     |
| 32 |                                           | Missing data <sup>4</sup> | 91 / 646    | -    | -                        | -                        |
| 33 |                                           |                           |             |      |                          |                          |
| 34 | <b>Genital warts</b>                      |                           |             |      |                          |                          |
| 35 |                                           | Never                     | 783 / 5,894 | 13.3 | 1.0 (ref)                | 1.0 (ref)                |
| 36 |                                           | Ever                      | 37 / 116    | 31.9 | <b>2.8 (1.8-4.2)</b>     | <b>1.7 (1.1-2.6)</b>     |

<sup>1</sup> Basic model: adjusted for age group (18-24, 25-34, 35-44, 45-54, 55-65) and population (Gran Canaria, Tenerife). <sup>2</sup>

Adjusted model: adjusted for age group, population, level of education, marital status, smoking habits, lifetime number of sexual partners, previous cervical lesions, ever use of rhythm method, and ever had genital warts. <sup>3</sup>

Includes women who were pregnant but had 0 live births. <sup>4</sup> Includes "Do not know" in the "Missing data" category. <sup>5</sup>

Includes syphilis, genital herpes, gonorrhoea, HIV (positive test), genital warts, Chlamydia, genital ulcer, others. <sup>6</sup>

Excludes ever had genital warts in the adjustment.

## DISCUSSION

### ***Prevalence of cervical HPV infection***

The prevalence of cervical HPV infection (LR-HPV and HR-HPV) in the whole studied population was 13.6% and 11.1% for HR-HPV. HPV prevalence in Spain reported in other published studies ranges from 2.7% to 17.5%.<sup>9-15</sup> Two published studies were population-based: one by de Sanjosé et al.<sup>10</sup> (2003) with a random sample of 973

1 women from the metropolitan area of Barcelona reporting an HPV prevalence of 3.4%  
2  
3  
4 (CI95% 2.3-4.5), which is rather lower than ours, and one by García et al.<sup>15</sup> (2017)  
5  
6 conducted in Castilla y León and reporting 9.6% of HPV prevalence, closer to ours.  
7  
8 Differences between both studies could be explained by changes in sexual behavior in  
9  
10 the Spanish population in recent years, with lower age at first sexual intercourse and  
11  
12 more sexual partners.<sup>16</sup>  
13  
14  
15  
16  
17

18 Non population-based studies include CLEOPATRE<sup>9</sup>, a study conducted in 17  
19  
20 Autonomous Communities in Spain, using the HC2 test and reporting 14.3% (CI95%  
21  
22 13.1-15.5) of HPV prevalence and 12.2% (CI95% 11.1-13.4) of HR-HPV infection, both  
23  
24 results were similar to ours.  
25  
26  
27  
28  
29

30 Studies conducted in other European countries reported varied results, with diverse  
31  
32 populations and different HPV testing methods. In a review of 18 European studies  
33  
34 conducted in 14 countries using the HPV-test as first screening (HC2 or PCR) the HR-  
35  
36 HPV prevalence, standardized by age, ranged from 1.7% in Spain to 12.5% in  
37  
38 Belgium.<sup>17</sup> Bruni et al. (2010) in a meta-analysis including one million women  
39  
40 worldwide with normal cytological findings observed 8.8% global adjusted HPV  
41  
42 prevalence in Southern Europe, 9% in Western Europe and 10% in Northern Europe.<sup>18</sup>  
43  
44  
45 Studies conducted among women from different European screening programs  
46  
47 showed HPV prevalences ranging from 6.4% in Germany<sup>19</sup>, 8.8% in Italy<sup>20</sup>, 13.7% in  
48  
49 France<sup>21</sup>, 15.2% in Belgium<sup>22</sup>, 19.4% in Portugal<sup>23</sup> to 26.4% in a population-based study  
50  
51 in Denmark.<sup>24</sup>  
52  
53  
54  
55  
56  
57  
58  
59  
60

### ***Prevalence of cervical HPV infection per age group***

1 As expected, the highest HPV prevalence found in our study was observed in women  
2  
3 aged 18-24 years (26.7%), an age group potentially associated with a higher number of  
4  
5 sexual partners. This finding was also observed in previous Spanish and European  
6  
7 studies.<sup>9, 16, 17</sup> In our study, after this first peak in women less than 25 years, the  
8  
9 prevalence declines in older ages, although a slightly, not significant, increased was  
10  
11 observed in women older than 55 years. This second peak in older women was also  
12  
13 reported by other authors.<sup>17,18,20,21,22</sup> Such a bimodal pattern could be due to changes  
14  
15 in the sexual behavior or the reactivation of latent viral infections<sup>25</sup>, HPV types and  
16  
17 their variants in such infections, individual susceptibility or regional differences in the  
18  
19 screening programs.<sup>18</sup>  
20  
21  
22  
23  
24  
25  
26  
27

### 28 ***HPV genotypes***

29  
30 HPV 16 was the most prevalent genotype in our population, present in 27.8% of  
31  
32 positive samples. This prevalence was similar to that reported in other studies in  
33  
34 Spain,<sup>10,14</sup> though higher than the 16.9% found in the CLEOPATRE study.<sup>9</sup> After HPV 16,  
35  
36 the most frequent types in decreasing order were: HPV 51, 53, 59, 31 and 52. Our  
37  
38 results are similar to most studies conducted in Spain<sup>9,10,11,14</sup> and other European  
39  
40 countries.<sup>19,21,22,23,24</sup>  
41  
42  
43  
44

45 Many studies have reported the percentage of multiple infections<sup>9,12,13,15,18,19,20,21,23,24</sup>  
46  
47 ranging from 8.1% in Spain<sup>13</sup> to 54.3% in Denmark.<sup>24</sup> The one from Denmark was  
48  
49 similar to ours (52.8%) although it included a higher percentage of infections by more  
50  
51 HPV types. This finding could be explained by the use of a HPV detection technique  
52  
53 (hybridization technology) with a high sensitivity for detecting multiple infections.  
54  
55

56  
57 A total of 31.8% of HPV positive women (4.3% of the total population) were infected  
58  
59 by types 16 and/or 18, which were included in the bivalent vaccine. Regarding HPV  
60

1 types included in the quadrivalent vaccine (HPV 6, 11, 16 and 18), at least one of them  
2  
3 was found in 36.2% of women (4.9% of the total population). This prevalence  
4  
5 increased up to 54.1% with the addition of HPV types 31/33/45/52/58, included in the  
6  
7 nonavalent vaccine. Such proportions were higher than those reported in Denmark<sup>24</sup>  
8  
9 (27.7%) and in the CLEOPATRE study (22.1% in Spain<sup>9</sup> and 32.6% in Portugal<sup>23</sup>). These  
10  
11 data illustrate the degree of protection offered by HPV vaccines; 1 out of 3 HPV  
12  
13 infected women would have been protected by the bivalent or the quadrivalent  
14  
15 vaccine and 1 out of 2 women would have been protected by the nonavalent one.  
16  
17 However, the frequency of HPV types 51, 53, 59, frequently found in our population,  
18  
19 indicate the need to continue the cytological screening population.  
20  
21  
22  
23  
24  
25  
26  
27

### 28 ***Cytopathological study and cervical HPV infection***

29  
30 Cytological alterations found in our study (5.3%) were similar to those observed in  
31  
32 other studies, both in Spain<sup>9,10,14</sup> and Europe<sup>19,20,22,23,24</sup>, ranging between 1.6% and 7%.  
33  
34 The HPV prevalence increased with lesion severity (60.7% in women with ASCUS;  
35  
36 86.8% in women with LSIL and 83.3% in women with HSIL+). This finding was in  
37  
38 agreement with other published studies.<sup>9,10,12,19,21,22,23,24</sup> The HPV prevalence in normal  
39  
40 cytologies was 10.6%, similar to that reported by Bruni et al.<sup>18</sup> in our geographical area  
41  
42 (8.8%), though lower than that reported in most studies.<sup>9,21,22,23,24</sup>  
43  
44  
45  
46  
47  
48  
49

### 50 ***Risk factors and cervical HPV infection***

51  
52 **Age** consistently appears as a risk factor for HPV infection, both in our study and other  
53  
54 published ones<sup>14,20,26,27</sup>, directly associated with younger women's sexual behavior as  
55  
56 compared to older ones.  
57  
58  
59  
60

1 **Number of sexual partners** in life extensively appears<sup>10,11,14,26,27,28</sup> as a risk factor for  
2 HPV infection and was the factor with the largest impact in our study. As in our study,  
3  
4 most authors failed to find a relationship with **age at first intercourse**.<sup>10,26,27</sup> This later  
5  
6 parameter seems to influence number of sexual partners but does not seem to be an  
7  
8 independent risk factor for HPV infection.  
9  
10

11  
12  
13 In our analysis, not being **married** (divorced, widow or single) was a statistically  
14 significant risk factor for HPV infection, as was also reported in other studies.<sup>10,20,26</sup>  
15  
16 This finding could be explained by the sexual behavior of not married women, who  
17  
18 may probably have more sexual partners.  
19  
20  
21

22  
23 **Coitus interruptus** was the only contraception related practice found to be associated  
24 to higher risk of any-type HPV infection, both in the basic and the adjusted models,  
25  
26 although such an association was not found for HR-HPV types. This factor might  
27  
28 possibly be linked to younger groups, where other risk increasing factors coexist.  
29  
30  
31

32  
33 **Smoking** was a risk factor for HPV infection in our population, in accordance with data  
34 reported by other authors<sup>26,27,29</sup> though not by others.<sup>10</sup> Quitting smoking has been  
35  
36 considered to potentially revert infection risk.<sup>29</sup> In order to explain for the relationship  
37  
38 between smoking and increased risk of HPV infection, it has been postulated that  
39  
40 tobacco and its metabolites may alter the immune system of the cervical epithelium,  
41  
42 thus reducing the number of CD4 lymphocytes and Langerhans cells<sup>29</sup> and impairing  
43  
44 the activity of natural killer cells.  
45  
46  
47

48  
49 The presence of **genital warts and previous cervical alterations** was associated with  
50 higher risk in our population, as well as in other studies<sup>26</sup>, which is not surprising since  
51  
52 both events are directly related.  
53  
54  
55

56  
57 **Country of origin**, especially African ones, appeared as a risk factor for HPV infection in  
58 our basic model, though not in our adjusted model. Earlier published Spanish studies  
59  
60

1 showed higher HPV infection risk in women born out of Spain<sup>10,11,26</sup>, probably due to  
2 differences in the sexual behavior of men and women.  
3

4  
5  
6 Regarding **parity** and HPV infection risk, similarly to other authors<sup>20</sup>, we found some  
7 protective effect in women with one or two births in our basic model for any-type HPV,  
8 though not for the adjusted model or for HR-HPV types, a finding also reported by  
9 some authors.<sup>10,26,27</sup> In a meta-analysis published by the IARC<sup>30</sup> a slight risk increase in  
10 nulliparous women (younger and more sexually active) as compared with women who  
11 have been pregnant was described.  
12  
13  
14  
15  
16  
17  
18  
19

20  
21 The relationship between **taking oral contraceptives (OC)** and the risk of HPV infection  
22 is controversial. In our population, a slightly increased risk was found for women taking  
23 OC in the basic model though not in the adjusted model, a finding also described in  
24 other studies.<sup>10,20,26,27,30</sup>  
25  
26  
27  
28  
29

30 Infection by other **sexually transmitted diseases** analyzed in our population increased  
31 the risk in the basic model but not in the adjusted model (data not shown), consistent  
32 with other published studies.<sup>26,27</sup>  
33  
34  
35  
36  
37

38 Some authors have reported no association between using condoms and increased risk  
39 of HPV infection;<sup>14,20,27,28</sup> some even reported some protective effect.<sup>26</sup> In our study,  
40 like with other contraceptive methods we failed to find an association with HPV  
41 infection (data not shown). The evidence is controversial regarding the association  
42 between HPV infection and level of education.<sup>26, 27, 31</sup>  
43  
44  
45  
46  
47  
48  
49  
50  
51

### 52 **Strengths and weaknesses**

53  
54 One of the main strengths of our study was our population-based design, which  
55 covered the main healthcare centers on the islands and recruited potential  
56 participants from an official source, ensuring a random sample. Additionally, the fact  
57  
58  
59  
60

1 that all cytological and molecular studies were conducted in the same laboratory, by  
2  
3  
4 the same technical and medical staff, using highly-sensitive and partially automated  
5  
6 analytic systems ensured consistency, homogeneity and reproducibility of diagnostic  
7  
8 methods.  
9

10  
11 The prolonged recruitment time was a weakness of this study. Three years were  
12  
13 needed for Tenerife and six years for Gran Canaria, although two years had been  
14  
15 originally planned. Potential variations over time could have influenced the socio-  
16  
17 demographic characteristics of the population. Thus, the characteristics of participants  
18  
19 recruited at the beginning of the recruitment period could have been different from  
20  
21 those of women recruited by the end.  
22  
23  
24  
25  
26  
27

## 28 **Conclusions**

29  
30 This study provides population-based references for the prevalence of HPV infection in  
31  
32 the Canary Islands, which enables future assessment of the impact of HPV vaccination  
33  
34 campaigns. The prevalence of HPV infection in the female population of Gran Canaria  
35  
36 and Tenerife was high, although similar to that of previous studies conducted in Spain,  
37  
38 with genotype HPV 16 being the most frequent one. These results support the  
39  
40 potential benefits of HPV vaccines in terms of reducing infection as well as the  
41  
42 consequent development of HPV-related lesions, including cancer.  
43  
44  
45  
46  
47  
48  
49  
50  
51  
52

## 53 **ACKNOWLEDGEMENTS**

54  
55 We would like to acknowledge all patients for their participation in the study. We  
56  
57 would also like to thank our colleagues and the study staff for their commitment to  
58  
59 data collection and to Dr. Jorge Luis Doreste from University of Las Palmas de Gran  
60

1  
2  
3  
4  
5  
6  
7  
8  
9  
10  
11  
12  
13  
14  
15  
16  
17  
18  
19  
20  
21  
22  
23  
24  
25  
26  
27  
28  
29  
30  
31  
32  
33  
34  
35  
36  
37  
38  
39  
40  
41  
42  
43  
44  
45  
46  
47  
48  
49  
50  
51  
52  
53  
54  
55  
56  
57  
58  
59  
60

Canaria for statistical analysis for simple size of the study. We are very grateful to Tenesoya Alamo, Tanausú de la Cruz and Maria Dolores Navarro for technical assistance. We have received donations of analytical kits from Sanofi Pasteur MSD (Merck Sharp & Dome Corp.), Roche Diagnostics® SL and Fujirebio® Ibérica SL.

**COMPETING INTERESTS:** None declared.

## **FUNDING**

This research has been funded by: Fondo de Investigación Sanitaria (Instituto de Salud Carlos III), grant FIS 00/714; Fundación Canaria de Investigación y Salud, grant FUNCIS 00/14 and FUNCIS 02/19 and Fundación Amurga. Funders had no involvement in the study design, collection, analysis, interpretation of the data, writing of the report nor in the decision to submit the paper for publication.

## **CONTRIBUTORSHIP STATEMENT**

MA designed the study, performed HPV diagnostic molecular methods, data analysis, interpretation of data, and drafted the manuscript. ER performed statistical analysis of data, designed the figures and drafted the manuscript. MP performed cytopathological diagnosis. MS performed HPV diagnostic molecular methods. MAS designed and supervised a base data and processed the experimental data. AT, BV, LA, RH, HPV Canary Study Group received the patients and took cervical samples. MCC and ARdP were involved in planning and supervised the management of cervical a molecular samples. AL, JLT, OA, VB, NM, SC, AQ treated patients with cytological and molecular disorders. LB, SS and ES aided in interpreting the results and worked on the manuscript. All authors read and approved the final manuscript.



## DATA SHARING

The database obtained from this study is kept under the supervision of the authors (Andujar M & Roura E) in an anonymized form. This data will be shared in a raw form by emailing to [mandsan@gobiernodecanarias.org](mailto:mandsan@gobiernodecanarias.org).

## REFERENCES

1. Ferlay J, Ervik M, Lam F, et al. (2018). Global Cancer Observatory: Cancer Today. Lyon, France: International Agency for Research on Cancer. Available from: <https://gco.iarc.fr/today> [accessed September 2, 2019].
2. Health Service, Government of Canary Islands. Available from: <http://www3.gobiernodecanarias.org/sanidad/scs> [accessed September 2, 2019].
3. Bray F, Colombet M, Mery L, et al, editors (2017) Cancer Incidence in Five Continents, Vol. XI (electronic version). Lyon: International Agency for Research on Cancer. Available from: <http://ci5.iarc.fr> [accessed September 2, 2019].
4. Bosch FX, Lorincz A, Muñoz N, et al. The causal relation between human papillomavirus and cervical cancer. *J Clin Pathol* 2002;55:244-65.
5. Muñoz N, Bosch FX, de Sanjosé S, et al. Epidemiologic classification of human papillomavirus types associated with cervical cancer. *N Engl J Med* 2003;348:518-27.
6. de Sanjosé S, Quint WG, Alemany L, et al. Human papillomavirus genotype attribution in invasive cervical cancer: a retrospective cross-sectional worldwide study. *Lancet Oncol* 2010;11:1048-56.

- 1  
2  
3  
4  
5  
6  
7  
8  
9  
10  
11  
12  
13  
14  
15  
16  
17  
18  
19  
20  
21  
22  
23  
24  
25  
26  
27  
28  
29  
30  
31  
32  
33  
34  
35  
36  
37  
38  
39  
40  
41  
42  
43  
44  
45  
46  
47  
48  
49  
50  
51  
52  
53  
54  
55  
56  
57  
58  
59  
60
7. Schiller JT, Castellsagué X, Garland SM. A review of clinical trials of human papillomavirus prophylactic vaccines. *Vaccine* 2012;30 Suppl 5:F123-38.
8. Joura EA, Giuliano AR, Iversen OE, et al. A 9-valent HPV vaccine against infection and intraepithelial neoplasia in women. *N Engl J Med* 2015;372:711-23.
9. Castellsagué X, Iftner T, Roura E, et al. Prevalence and genotype distribution of human papillomavirus infection of the cervix in Spain: The CLEOPATRE Study. *J Med Virol* 2012;84:947-56.
10. de Sanjosé S, Almira R, Lloveras B, et al. Cervical human papillomavirus infection in the female population in Barcelona, Spain. *Sex Transm Dis* 2003;30:788-93.
11. González C, Ortiz M, Canals J, et al. Higher prevalence of Human Papillomavirus infection in migrant women from Latin America in Spain. *Sex Transm Infect* 2006;82:260-62.
12. Bernal M, Burillo I, Mayordomo JI, et al. Human Papillomavirus (HPV) infection and intraepithelial neoplasia and invasive cancer of the uterine cervix: a case-control study in Zaragoza, Spain. *Infect Agent Cancer* 2008;3:8.
13. Martorell M, García-García JA, Ortiz C, et al. Prevalence and distribution of human papillomavirus findings in swab specimens from gynaecology clinics of the east coast of Spain. *Scand J Infect Dis* 2010;42:549-53.
14. Trigo-Daporta M, García-Campello M, Pérez-Ríos M, et al. High-risk human papillomavirus in Galicia, Spain: prevalence and evaluation of the sample representativeness. *Scand J Infect Dis* 2014;46:737-44.
15. García S, Dominguez-Gil M, Gayete J, et al. [Prevalence of human papillomavirus in Spanish women from a population screening program]. *Rev Esp Quimioter* 2017;30:177-82.

- 1 16. de Sanjosé S, Cortés X, Méndez C, et al. Age at sexual initiation and number of sexual  
2 partners in the female Spanish population: Results from the AFRODITA survey. *Eur J*  
3  
4 *Obstet Gynecol Reprod Biol* 2008;140:234–40.  
5  
6  
7
- 8 17. de Vuyst H, Clifford G, Li N, et al. HPV infection in Europe. *Eur J Cancer* 2009;45:2632-9.  
9
- 10 18. Bruni L, Diaz M, Castellsagué X, et al. Cervical human papillomavirus prevalence in 5  
11 continents: Meta-analysis of 1 million women with normal cytological findings. *J Infect*  
12  
13 *Dis* 2010;202:1789–99.  
14  
15  
16
- 17 19. Klug SJ, Hukelmann M, Hollwitz B, et al. Prevalence of human papillomavirus types in  
18 women screened by cytology in Germany. *J Med Virol* 2007;79:616-25.  
19  
20  
21
- 22 20. Ronco G, Ghisetti V, Segnan N, et al. Prevalence of human papillomavirus infection in  
23 women in Turin, Italy. *Eur J Cancer* 2005;41:297-305.  
24  
25  
26
- 27 21. Heard I, Tondeur L, Arowas L, et al. Human papillomavirus types distribution in  
28 organized cervical cancer screening in France. *PloS One* 2013;8:e79372.  
29  
30  
31
- 32 22. Arbyn M, Benoy I, Simoens C, et al. Prevaccination distribution of human  
33 papillomavirus types in women attending at cervical cancer screening in Belgium.  
34  
35 *Cancer Epidemiol Biomarkers Prev* 2009;18:321-30.  
36  
37  
38
- 39 23. Pista A, Freire de Oliveira C, Cunha MJ, et al. Prevalence of Human Papillomavirus  
40 Infection in Women in Portugal. The CLEOPATRE Portugal Study. *Int J Gynecol Cancer*  
41  
42 2011;21:1150-8.  
43  
44  
45
- 46 24. Kjaer S, Breugelmans G, Munk C, et al. Population-based prevalence, type- and age-  
47 specific distribution of HPV in women before introduction of an HPV-vaccination  
48 program in Denmark. *Int J Cancer* 2008;123:1864-70.  
49  
50  
51
- 52 25. Gravitt PE, Rositch AF, Silver MI, et al. A cohort effect of the sexual revolution may be  
53 masking an increase in human papillomavirus detection at menopause in the United  
54 States. *J Infect Dis* 2013;207:272-80.  
55  
56  
57  
58  
59  
60

- 1  
2  
3  
4  
5  
6  
7  
8  
9  
10  
11  
12  
13  
14  
15  
16  
17  
18  
19  
20  
21  
22  
23  
24  
25  
26  
27  
28  
29  
30  
31  
32  
33  
34  
35  
36  
37  
38  
39  
40  
41  
42  
43  
44  
45  
46  
47  
48  
49  
50
26. Roura E, Iftner T, Vidart JA, et al. Predictors of human papillomavirus infection in women undergoing routine cervical cancer screening in Spain: the CLEOPATRE study. *BMC Infect Dis* 2012;12:145.
  27. Pista A, de Oliveira CF, Cunha MJ, et al. Risk factors for human papillomavirus infection among women in Portugal: the CLEOPATRE Portugal Study. *Int J Gynaecol Obstet* 2012;118:112-6.
  28. Vaccarella S, Franceschi S, Herrero R, et al. Sexual behavior, condom use, and human papillomavirus: pooled analysis of the IARC human papillomavirus prevalence surveys. *Cancer Epidemiol Biomarkers Prev* 2006;15:326–33.
  29. Vaccarella S, Herrero R, Snijders PJ, et al. Smoking and human papillomavirus infection: pooled analysis of the International Agency for Research on Cancer HPV Prevalence Surveys. *Int J Epidemiol* 2008;37:536–46.
  30. Vaccarella S, Herrero R, Dai M, et al. Reproductive factors, oral contraceptive use, and human papillomavirus infection: pooled analysis of the IARC HPV prevalence surveys. *Cancer Epidemiol Biomarkers Prev* 2006;15:2148–53.
  31. Franceschi S, Plummer M, Clifford G, et al. Differences in the risk of cervical cancer and human papillomavirus infection by education level. *Br J Cancer*. 2009;101:865-70.

51  
52

#### Legend of Fig. 1

53  
54  
55  
56  
57  
58  
59  
60

Figure 1 – Overall prevalence and age-specific prevalence of cervical HPV infections by any HPV type, any hr HPV type, HPV types 16/18, and HPV types 6/11/16/18/31/33/45/52/58.

1  
2  
3  
4  
5  
6  
7  
8  
9  
10  
11  
12  
13  
14  
15  
16  
17  
18  
19  
20  
21  
22  
23  
24  
25  
26  
27  
28  
29  
30  
31  
32  
33  
34  
35  
36  
37  
38  
39  
40  
41  
42  
43  
44  
45  
46  
47  
48  
49  
50  
51  
52  
53  
54  
55  
56  
57  
58  
59  
60

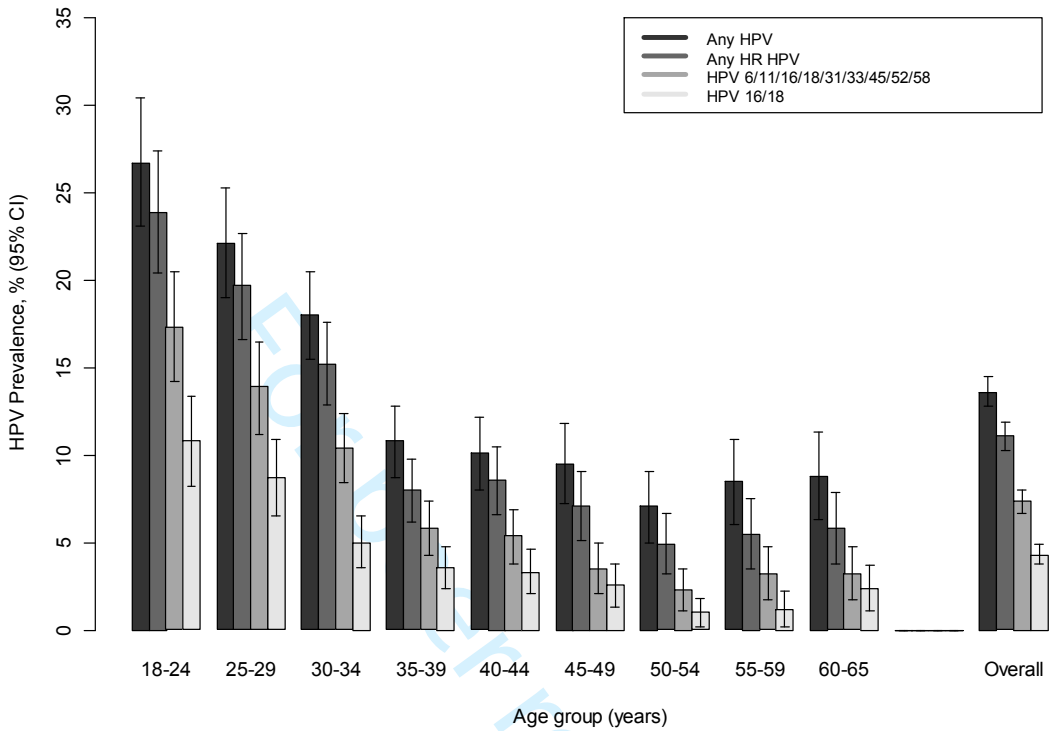

HPV: Human Papillomavirus; HR: High-Risk; CI: Confidence Interval.

Supplementary Table 1 – Characteristics of the study participants by population.

| Study sample characteristics                    | GRAN CANARIA<br>(GENERAL POP.)<br>(n=3,212) | GRAN CANARIA<br>(VOLUNTEERS)<br>(n=665)  | TENERIFE<br>(n=2,214)                 |
|-------------------------------------------------|---------------------------------------------|------------------------------------------|---------------------------------------|
|                                                 | N (%)                                       | N (%)                                    | N (%)                                 |
| <b>Age distribution (years)</b>                 | <i>P(GCgp-TF)=0.08<sup>5</sup></i>          | <i>P(GCgp-GCv)=0.003<sup>6</sup></i>     | <i>P(GC-TF)=0.07<sup>7</sup></i>      |
| 18-24                                           | 276 (8.6)                                   | 65 (9.8)                                 | 231 (10.4)                            |
| 25-29                                           | 374 (11.6)                                  | 59 (8.9)                                 | 230 (10.4)                            |
| 30-34                                           | 480 (14.9)                                  | 94 (14.1)                                | 331 (15.0)                            |
| 35-39                                           | 460 (14.3)                                  | 110 (16.5)                               | 332 (15.0)                            |
| 40-44                                           | 435 (13.5)                                  | 88 (13.2)                                | 270 (12.2)                            |
| 45-49                                           | 342 (10.6)                                  | 86 (12.9)                                | 203 (9.2)                             |
| 50-54                                           | 307 (9.6)                                   | 65 (9.8)                                 | 241 (10.9)                            |
| 55-59                                           | 254 (7.9)                                   | 66 (9.9)                                 | 182 (8.2)                             |
| 60-65                                           | 284 (8.8)                                   | 32 (4.8)                                 | 194 (8.8)                             |
| <b>Level of education</b>                       | <i>P(GCgp-TF)&lt;0.001<sup>5</sup></i>      | <i>P(GCgp-GCv) &lt;0.001<sup>6</sup></i> | <i>P(GC-TF) &lt;0.001<sup>7</sup></i> |
| None                                            | 94 (2.9)                                    | 11 (1.7)                                 | 65 (2.9)                              |
| Preschool                                       | 167 (5.2)                                   | 22 (3.3)                                 | 99 (4.5)                              |
| Primary                                         | 1610 (50.2)                                 | 301 (45.3)                               | 771 (34.8)                            |
| Secondary                                       | 778 (24.3)                                  | 188 (28.3)                               | 533 (24.1)                            |
| Certificate of advanced study                   | 339 (10.6)                                  | 97 (14.6)                                | 319 (14.4)                            |
| Bachelor's degree                               | 190 (5.9)                                   | 42 (6.3)                                 | 358 (16.2)                            |
| Others                                          | 26 (0.8)                                    | 3 (0.5)                                  | 69 (3.1)                              |
| Missing data                                    | 8 (-)                                       | 1 (-)                                    | 0 (-)                                 |
| <b>Marital status</b>                           | <i>P(GCgp-TF)&lt;0.001<sup>5</sup></i>      | <i>P(GCgp-GCv) &lt;0.001<sup>6</sup></i> | <i>P(GC-TF)=0.03<sup>7</sup></i>      |
| Single                                          | 757 (23.6)                                  | 148 (22.3)                               | 491 (22.2)                            |
| Married/de facto partnership                    | 2106 (65.7)                                 | 408 (61.4)                               | 1405 (63.5)                           |
| Divorced/separated                              | 247 (7.7)                                   | 90 (13.6)                                | 236 (10.7)                            |
| Widowed                                         | 97 (3.0)                                    | 18 (2.7)                                 | 80 (3.6)                              |
| Missing data                                    | 5 (-)                                       | 1 (-)                                    | 2 (-)                                 |
| <b>Pregnancies</b>                              | <i>P(GCgp-TF)=0.6<sup>5</sup></i>           | <i>P(GCgp-GCv)=0.9<sup>6</sup></i>       | <i>P(GC-TF) =0.6<sup>7</sup></i>      |
| No                                              | 701 (22.2)                                  | 147 (22.6)                               | 495 (23.0)                            |
| Yes                                             | 2450 (77.8)                                 | 504 (77.4)                               | 1659 (77.0)                           |
| Missing data                                    | 61 (-)                                      | 14 (-)                                   | 60 (-)                                |
| <b>Number of live births<sup>1</sup></b>        | <i>P(GCgp-TF)=0.6<sup>5</sup></i>           | <i>P(GCgp-GCv)=0.02<sup>6</sup></i>      | <i>P(GC-TF) =0.7<sup>7</sup></i>      |
| 0                                               | 11 (0.5)                                    | 4 (0.8)                                  | 13 (0.9)                              |
| 1                                               | 669 (29.2)                                  | 120 (25.1)                               | 448 (29.3)                            |
| 2                                               | 936 (40.8)                                  | 219 (45.7)                               | 631 (41.3)                            |
| 3                                               | 440 (19.2)                                  | 72 (15.0)                                | 277 (18.1)                            |
| 4                                               | 136 (5.9)                                   | 41 (8.6)                                 | 100 (6.5)                             |
| ≥5                                              | 103 (4.5)                                   | 23 (4.8)                                 | 60 (3.9)                              |
| Missing data                                    | 155 (-)                                     | 25 (-)                                   | 130 (-)                               |
| <b>Sexually transmitted disease<sup>2</sup></b> | <i>P(GCgp-TF)=0.1<sup>5</sup></i>           | <i>P(GCgp-GCv)=0.4<sup>6</sup></i>       | <i>P(GC-TF) =0.2<sup>7</sup></i>      |
| Never                                           | 3113 (96.9)                                 | 640 (96.2)                               | 2129 (96.2)                           |
| Ever                                            | 99 (3.1)                                    | 25 (3.8)                                 | 85 (3.8)                              |
| <b>Smoking status</b>                           | <i>P(GCgp-TF)&lt;0.001<sup>5</sup></i>      | <i>P(GCgp-GCv)=0.04<sup>6</sup></i>      | <i>P(GC-TF)&lt;0.001<sup>7</sup></i>  |
| Never smoked                                    | 1897 (59.1)                                 | 375 (56.4)                               | 1171 (52.9)                           |
| Ex smoker                                       | 454 (14.1)                                  | 120 (18)                                 | 339 (15.3)                            |
| Current smoker                                  | 861 (26.8)                                  | 170 (25.6)                               | 704 (31.8)                            |
| <b>Previous cervical pap smears</b>             | <i>P(GCgp-TF)&lt;0.001<sup>5</sup></i>      | <i>P(GCgp-GCv)=0.02<sup>6</sup></i>      | <i>P(GC-TF)&lt;0.001<sup>7</sup></i>  |

|  |                                                |                                 |                                |                               |
|--|------------------------------------------------|---------------------------------|--------------------------------|-------------------------------|
|  | None                                           | 85 (2.6)                        | 21 (3.2)                       | 110 (5)                       |
|  | 1                                              | 281 (8.7)                       | 32 (4.8)                       | 180 (8.1)                     |
|  | 2-3                                            | 561 (17.5)                      | 128 (19.2)                     | 367 (16.6)                    |
|  | 4-5                                            | 406 (12.6)                      | 77 (11.6)                      | 289 (13.1)                    |
|  | >5                                             | 1704 (53.1)                     | 371 (55.8)                     | 1198 (54.1)                   |
|  | Do not know                                    | 175 (5.4)                       | 36 (5.4)                       | 70 (3.2)                      |
|  | <b>Previous cervical lesions</b> <sup>3</sup>  | $P(GCgp-TF)=0.09$ <sup>5</sup>  | $P(GCgp-GCv)=0.3$ <sup>6</sup> | $P(GC-TF)=0.2$ <sup>7</sup>   |
|  | No                                             | 2561 (92.9)                     | 521 (91.7)                     | 1755 (92.2)                   |
|  | Yes                                            | 190 (6.9)                       | 47 (8.3)                       | 148 (7.8)                     |
|  | Do not know                                    | 5 (0.2)                         | 0 (0.0)                        | 0 (0.0)                       |
|  | Missing data                                   | 371 (-)                         | 76 (-)                         | 201 (-)                       |
|  | <b>Age at first sexual intercourse (years)</b> | $P(GCgp-TF)=0.007$ <sup>5</sup> | $P(GCgp-GCv)=0.2$ <sup>6</sup> | $P(GC-TF)=0.006$ <sup>7</sup> |
|  | <15                                            | 92 (2.9)                        | 19 (2.9)                       | 76 (3.5)                      |
|  | 15-16                                          | 415 (13.1)                      | 80 (12.2)                      | 333 (15.2)                    |
|  | 17-18                                          | 947 (29.8)                      | 207 (31.5)                     | 709 (32.4)                    |
|  | 19-20                                          | 689 (21.7)                      | 157 (23.9)                     | 435 (19.9)                    |
|  | 21-25                                          | 772 (24.3)                      | 158 (24.0)                     | 491 (22.4)                    |
|  | >25                                            | 259 (8.2)                       | 36 (5.5)                       | 147 (6.7)                     |
|  | Missing data                                   | 38 (-)                          | 8 (-)                          | 23 (-)                        |
|  | <b>Lifetime number of sexual partners</b>      | $P(GCgp-TF)<0.001$ <sup>5</sup> | $P(GCgp-GCv)=0.2$ <sup>6</sup> | $P(GC-TF)<0.001$ <sup>7</sup> |
|  | 1                                              | 1922 (60.7)                     | 377 (57.2)                     | 933 (43.0)                    |
|  | 2-3                                            | 755 (23.8)                      | 154 (23.4)                     | 662 (30.5)                    |
|  | 4-5                                            | 250 (7.9)                       | 68 (10.3)                      | 296 (13.6)                    |
|  | 6-10                                           | 172 (5.4)                       | 42 (6.4)                       | 191 (8.8)                     |
|  | 11-20                                          | 49 (1.5)                        | 13 (2.0)                       | 64 (2.9)                      |
|  | >20                                            | 19 (0.6)                        | 5 (0.8)                        | 25 (1.2)                      |
|  | Missing data                                   | 45 (-)                          | 6 (-)                          | 43 (-)                        |
|  | <b>Contraceptive methods used</b> <sup>4</sup> | $P(GCgp-TF)=0.2$ <sup>5</sup>   | $P(GCgp-GCv)=0.9$ <sup>6</sup> | $P(GC-TF)=0.1$ <sup>7</sup>   |
|  | Oral contraceptives                            | 2477 (77.1)                     | 515 (77.4)                     | 1672 (75.5)                   |
|  | IUD                                            | 597 (18.6)                      | 154 (23.2)                     | 382 (17.3)                    |
|  | Condom                                         | 2311 (71.9)                     | 495 (74.4)                     | 1716 (77.5)                   |
|  | Rhythm method/coitus interruptus               | 1559 (48.5)                     | 351 (52.8)                     | 1139 (51.4)                   |
|  | Diaphragm/spermicide                           | 136 (4.2)                       | 23 (3.5)                       | 75 (3.4)                      |
|  | Injection/implant                              | 160 (5.0)                       | 26 (3.9)                       | 67 (3.0)                      |
|  | Tube ligation                                  | 430 (13.4)                      | 97 (14.6)                      | 275 (12.4)                    |
|  | Vasectomy                                      | 332 (10.3)                      | 85 (12.8)                      | 132 (6.0)                     |

GCgp: Gran Canaria (general population); GCv: Gran Canaria (volunteers); GC: Gran Canaria (including general population and volunteers); TF: Tenerife.

<sup>1</sup> Among ever pregnant women. <sup>2</sup> Includes syphilis, genital herpes, gonorrhoea, HIV (positive test), genital warts, Chlamydia, genital ulcer, others. <sup>3</sup> Among women with a previous pap smear. <sup>4</sup> Do not add the total of women

1  
2  
3 because a woman can use more than one contraceptive in lifetime. <sup>5</sup> P-value of Pearson's Chi-squared test between  
4 Gran Canaria (general population) and Tenerife. <sup>6</sup> P-value of Pearson's Chi-squared test between Gran Canaria  
5 (general population) and Gran Canaria (volunteers). <sup>7</sup> P-value of Pearson's Chi-squared test between Gran Canaria  
6 (general population and volunteers) and Tenerife.  
7  
8  
9  
10  
11  
12  
13  
14  
15  
16  
17  
18  
19  
20  
21  
22  
23  
24  
25  
26  
27  
28  
29  
30  
31  
32  
33  
34  
35  
36  
37  
38  
39  
40  
41  
42  
43  
44  
45  
46  
47  
48  
49  
50  
51  
52  
53  
54  
55  
56  
57  
58  
59  
60

For peer review only



Supplementary Table 2 – Prevalence of Human Papillomavirus (HPV) by age group for any type and for any high-risk type and by population.

**GRAN CANARIA – GENERAL POPULATION (n=3,185)**

| Age group (years) | Number of tested women | Number of HPV positive women | Any HPV prevalence (%; 95% CI) | Any HR HPV prevalence <sup>1</sup> (%; 95% CI) |
|-------------------|------------------------|------------------------------|--------------------------------|------------------------------------------------|
| 18-24             | 274                    | 64                           | 23.4 (18.3-28.4)               | 21.9 (17.0-26.8)                               |
| 25-29             | 372                    | 81                           | 21.8 (17.6-26.0)               | 19.1 (15.1-23.1)                               |
| 30-34             | 478                    | 74                           | 15.5 (12.2-18.7)               | 12.3 (9.4-15.3)                                |
| 35-39             | 455                    | 42                           | 9.2 (6.6-11.9)                 | 6.6 (4.3-8.9)                                  |
| 40-44             | 432                    | 45                           | 10.4 (7.5-13.3)                | 9.3 (6.5-12.0)                                 |
| 45-49             | 339                    | 37                           | 10.9 (7.6-14.2)                | 8.3 (5.3-11.2)                                 |
| 50-54             | 304                    | 20                           | 6.6 (3.8-9.4)                  | 4.9 (2.5-7.4)                                  |
| 55-59             | 252                    | 14                           | 5.6 (2.7-8.4)                  | 4.0 (1.6-6.4)                                  |
| 60-65             | 279                    | 28                           | 10.0 (6.5-13.6)                | 5.7 (3.0-8.5)                                  |
| <b>Total</b>      | <b>3,185</b>           | <b>405</b>                   | <b>12.7 (11.6-13.9)</b>        | <b>10.3 (9.3-11.4)</b>                         |

HPV: Human Papillomavirus; CI: Confidence Interval; HR: High-Risk.

<sup>1</sup> HR types includes high-risk types and possibly /probably high-risk types: 16, 18, 31, 33, 35, 39, 45, 51, 52, 56, 58, 59, 53, 66, 67, 68, 69, 69/71, 70, 73.

**GRAN CANARIA – VOLUNTEERS (n=662)**

| Age group (years) | Number of tested women | Number of HPV positive women | Any HPV prevalence (%; 95% CI) | Any HR HPV prevalence <sup>1</sup> (%; 95% CI) |
|-------------------|------------------------|------------------------------|--------------------------------|------------------------------------------------|
| 18-24             | 65                     | 17                           | 26.2 (15.5-36.8)               | 23.1 (12.8-33.3)                               |
| 25-29             | 59                     | 12                           | 20.3 (10.1-30.6)               | 16.9 (7.4-26.5)                                |
| 30-34             | 94                     | 19                           | 20.2 (12.1-28.3)               | 19.1 (11.2-27.1)                               |
| 35-39             | 109                    | 17                           | 15.6 (8.8-22.4)                | 12.8 (6.6-19.1)                                |
| 40-44             | 88                     | 11                           | 12.5 (5.6-19.4)                | 9.1 (3.1-15.1)                                 |
| 45-49             | 85                     | 8                            | 9.4 (3.2-15.6)                 | 4.7 (0.2-9.2)                                  |
| 50-54             | 65                     | 3                            | 4.6 (0.0-9.7)                  | 4.6 (0.0-9.7)                                  |
| 55-59             | 65                     | 7                            | 10.8 (3.2-18.3)                | 6.2 (0.3-12.0)                                 |
| 60-65             | 32                     | 2                            | 6.2 (0.0-14.6)                 | 6.2 (0.0-14.6)                                 |
| <b>Total</b>      | <b>662</b>             | <b>96</b>                    | <b>14.5 (11.8-17.2)</b>        | <b>11.8 (9.3-14.2)</b>                         |

HPV: Human Papillomavirus; CI: Confidence Interval; HR: High-Risk.

<sup>1</sup> HR types includes high-risk types and possibly /probably high-risk types: 16, 18, 31, 33, 35, 39, 45, 51, 52, 56, 58, 59, 53, 66, 67, 68, 69, 69/71, 70, 73.

**GRAN CANARIA (n=3,847)**

| Age group (years) | Number of tested women | Number of HPV positive women | Any HPV prevalence (%; 95% CI) | Any HR HPV prevalence <sup>1</sup> (%; 95% CI) |
|-------------------|------------------------|------------------------------|--------------------------------|------------------------------------------------|
| 18-24             | 339                    | 81                           | 23.9 (19.4-28.4)               | 22.1 (17.7-26.5)                               |
| 25-29             | 431                    | 93                           | 21.6 (17.7-25.5)               | 18.8 (15.1-22.5)                               |
| 30-34             | 572                    | 93                           | 16.3 (13.2-19.3)               | 13.5 (10.7-16.3)                               |
| 35-39             | 564                    | 59                           | 10.5 (7.9-13.0)                | 7.8 (5.6-10.0)                                 |
| 40-44             | 520                    | 56                           | 10.8 (8.1-13.4)                | 9.2 (6.7-11.7)                                 |
| 45-49             | 424                    | 45                           | 10.6 (7.7-13.5)                | 7.5 (5.0-10.1)                                 |
| 50-54             | 369                    | 23                           | 6.2 (3.8-8.7)                  | 4.9 (2.7-7.1)                                  |
| 55-59             | 317                    | 21                           | 6.6 (3.9-9.4)                  | 4.4 (2.2-6.7)                                  |
| 60-65             | 311                    | 30                           | 9.6 (6.4-12.9)                 | 5.8 (3.2-8.4)                                  |
| <b>Total</b>      | <b>3,847</b>           | <b>501</b>                   | <b>13.0 (12.0-14.1)</b>        | <b>10.6 (9.6-11.6)</b>                         |

HPV: Human Papillomavirus; CI: Confidence Interval; HR: High-Risk.

<sup>1</sup> HR types includes high-risk types and possibly /probably high-risk types: 16, 18, 31, 33, 35, 39, 45, 51, 52, 56, 58, 59, 53, 66, 67, 68, 69, 69/71, 70, 73.

**TENERIFE (n=2,163)**

| Age group (years) | Number of tested women | Number of HPV positive women | Any HPV prevalence (%; 95% CI) | Any HR HPV prevalence <sup>1</sup> (%; 95% CI) |
|-------------------|------------------------|------------------------------|--------------------------------|------------------------------------------------|
| 18-24             | 226                    | 70                           | 31.0 (24.9-37.0)               | 26.5 (20.8-32.3)                               |
| 25-29             | 224                    | 52                           | 23.2 (17.7-28.7)               | 21.4 (16.1-26.8)                               |
| 30-34             | 322                    | 68                           | 21.1 (16.7-25.6)               | 18.3 (14.1-22.5)                               |
| 35-39             | 326                    | 37                           | 11.3 (7.9-14.8)                | 8.3 (5.3-11.3)                                 |
| 40-44             | 263                    | 23                           | 8.7 (5.3-12.2)                 | 7.2 (4.1-10.4)                                 |
| 45-49             | 198                    | 14                           | 7.1 (3.5-10.6)                 | 6.1 (2.7-9.4)                                  |
| 50-54             | 238                    | 20                           | 8.4 (4.9-11.9)                 | 5.0 (2.3-7.8)                                  |
| 55-59             | 178                    | 21                           | 11.8 (7.1-16.5)                | 7.3 (3.5-11.1)                                 |
| 60-65             | 188                    | 14                           | 7.4 (3.7-11.2)                 | 5.9 (2.5-9.2)                                  |
| <b>Total</b>      | <b>2,163</b>           | <b>319</b>                   | <b>14.7 (13.3-16.2)</b>        | <b>12.1 (10.7-13.4)</b>                        |

HPV: Human Papillomavirus; CI: Confidence Interval; HR: High-Risk.

<sup>1</sup> HR types includes high-risk types and possibly /probably high-risk types: 16, 18, 31, 33, 35, 39, 45, 51, 52, 56, 58, 59, 53, 66, 67, 68, 69, 69/71, 70, 73.

**Supplementary Table 3 – Overall prevalence and age-specific prevalence of cervical HPV infections by any HPV type, any hr HPV type, HPV types 6/11/16/18/31/33/45/52/58 and HPV types 16/18 (n=6,010 women).**

| Age group (years) | Any HPV prevalence (%; 95% CI) | Any HR HPV prevalence <sup>1</sup> (%; 95% CI) | Prevalence of HPV 6/11/16/18/31/33/45/52/58 (%; 95% CI) | Prevalence of HPV 16/18 (%; 95% CI) |
|-------------------|--------------------------------|------------------------------------------------|---------------------------------------------------------|-------------------------------------|
| 18-24             | 26.7 (23.1-30.4)               | 23.9 (20.4-27.4)                               | 17.3 (14.2-20.5)                                        | 10.8 (8.2-13.4)                     |
| 25-29             | 22.1 (19.0-25.3)               | 19.7 (16.6-22.7)                               | 13.9 (11.2-16.5)                                        | 8.7 (6.5-10.9)                      |
| 30-34             | 18.0 (15.5-20.5)               | 15.2 (12.9-17.6)                               | 10.4 (8.4-12.4)                                         | 5.0 (3.6-6.5)                       |
| 35-39             | 10.8 (8.7-12.8)                | 8.0 (6.2-9.8)                                  | 5.8 (4.3-7.4)                                           | 3.6 (2.4-4.8)                       |
| 40-44             | 10.1 (8.0-12.2)                | 8.6 (6.6-10.5)                                 | 5.4 (3.8-6.9)                                           | 3.3 (2.1-4.6)                       |
| 45-49             | 9.5 (7.2-11.8)                 | 7.1 (5.1-9.1)                                  | 3.5 (2.1-5.0)                                           | 2.6 (1.3-3.8)                       |
| 50-54             | 7.1 (5.0-9.1)                  | 4.9 (3.2-6.7)                                  | 2.3 (1.1-3.5)                                           | 1.0 (0.2-1.8)                       |
| 55-59             | 8.5 (6.0-10.9)                 | 5.5 (3.5-7.5)                                  | 3.2 (1.7-4.8)                                           | 1.2 (0.2-2.2)                       |
| 60-65             | 8.8 (6.3-11.3)                 | 5.8 (3.8-7.9)                                  | 3.2 (1.7-4.8)                                           | 2.4 (1.1-3.7)                       |
| <b>Total</b>      | <b>13.6 (12.8-14.5)</b>        | <b>11.1 (10.3-11.9)</b>                        | <b>7.4 (6.7-8.0)</b>                                    | <b>4.3 (3.8-4.9)</b>                |

HPV: Human Papillomavirus; HR: High-Risk; CI: Confidence Interval.

<sup>1</sup> HR HPV types includes high-risk types and possibly /probably high-risk types: 16, 18, 31, 33, 35, 39, 45, 51, 52, 56, 58, 59, 53, 66, 67, 68, 69, 69/71, 70, 73.

Supplementary Table 4 – Human Papillomavirus (HPV) type-specific distribution of the most common types (n=6,010 women) by cytology result.

| HPV type                         | NORMAL CYTOLOGY (n=5,693)    |                                            |                                                 | ABNORMAL CYTOLOGY (n=317)    |                                            |                                                 |
|----------------------------------|------------------------------|--------------------------------------------|-------------------------------------------------|------------------------------|--------------------------------------------|-------------------------------------------------|
|                                  | Number of HPV positive women | HPV prevalence among all women (%; 95% CI) | HPV prevalence among positive women (%; 95% CI) | Number of HPV positive women | HPV prevalence among all women (%; 95% CI) | HPV prevalence among positive women (%; 95% CI) |
| <b>Any HPV types</b>             | <b>601</b>                   | <b>10.6 (9.8-11.4)</b>                     | <b>-</b>                                        | <b>219</b>                   | <b>69.1 (64.0-74.2)</b>                    | <b>-</b>                                        |
| <b>Single types</b>              | <b>260</b>                   | <b>4.6 (4.0-5.1)</b>                       | <b>43.3 (39.3-47.2)</b>                         | <b>99</b>                    | <b>31.2 (26.1-36.3)</b>                    | <b>45.2 (38.6-51.8)</b>                         |
| <i>HR HPV types</i> <sup>1</sup> |                              |                                            |                                                 |                              |                                            |                                                 |
| 16                               | 56                           | 1.0 (0.7-1.2)                              | 9.3 (7.0-11.6)                                  | 19                           | 6.0 (3.4-8.6)                              | 8.7 (4.9-12.4)                                  |
| 51                               | 22                           | 0.4 (0.2-0.5)                              | 3.7 (2.2-5.2)                                   | 12                           | 3.8 (1.7-5.9)                              | 5.5 (2.5-8.5)                                   |
| 53                               | 21                           | 0.4 (0.2-0.5)                              | 3.5 (2.0-5.0)                                   | 7                            | 2.2 (0.6-3.8)                              | 3.2 (0.9-5.5)                                   |
| 31                               | 14                           | 0.2 (0.1-0.4)                              | 2.3 (1.1-3.5)                                   | 2                            | 0.6 (0.2-1.5)                              | 0.9 (0.3-2.2)                                   |
| 59                               | 8                            | 0.1 (0.0-0.2)                              | 1.3 (0.4-2.2)                                   | 6                            | 1.9 (0.4-3.4)                              | 2.7 (0.6-4.9)                                   |
| 33                               | 10                           | 0.2 (0.1-0.3)                              | 1.3 (0.4-2.2)                                   | 1                            | 0.3 (0.3-0.9)                              | 0.5 (0.4-1.3)                                   |
| 68                               | 4                            | 0.1 (0.0-0.1)                              | 0.7 (0.0-1.3)                                   | 7                            | 2.2 (0.6-3.8)                              | 3.2 (0.9-5.5)                                   |
| 70                               | 7                            | 0.1 (0.0-0.2)                              | 1.2 (0.3-2.0)                                   | 4                            | 1.3 (0.0-2.5)                              | 1.8 (0.1-3.6)                                   |
| 66                               | 10                           | 0.2 (0.1-0.3)                              | 1.7 (0.6-2.7)                                   | -                            | -                                          | -                                               |
| 52                               | 6                            | 0.1 (0.0-0.2)                              | 1.0 (0.2-1.8)                                   | 3                            | 0.9 (0.1-2.0)                              | 1.4 (0.2-2.9)                                   |
| 58                               | 4                            | 0.1 (0.0-0.1)                              | 0.7 (0.0-1.3)                                   | 5                            | 1.6 (0.2-2.9)                              | 2.3 (0.3-4.3)                                   |
| 18                               | 7                            | 0.1 (0.0-0.2)                              | 1.2 (0.3-2.0)                                   | 1                            | 0.3 (0.3-0.9)                              | 0.5 (0.4-1.3)                                   |
| 56                               | 3                            | 0.1 (0.0-0.1)                              | 0.5 (0.0-1.1)                                   | 4                            | 1.3 (0.0-2.5)                              | 1.8 (0.1-3.6)                                   |
| 35                               | 3                            | 0.1 (0.0-0.1)                              | 0.5 (0.0-1.1)                                   | 2                            | 0.6 (0.2-1.5)                              | 0.9 (0.3-2.2)                                   |
| 39                               | 3                            | 0.1 (0.0-0.1)                              | 0.5 (0.0-1.1)                                   | 2                            | 0.6 (0.2-1.5)                              | 0.9 (0.3-2.2)                                   |
| 73                               | 3                            | 0.1 (0.0-0.1)                              | 0.5 (0.0-1.1)                                   | 1                            | 0.3 (0.3-0.9)                              | 0.5 (0.4-1.3)                                   |
| 45                               | 2                            | 0.0 (0.0-0.1)                              | 0.3 (0.0-0.8)                                   | 1                            | 0.3 (0.3-0.9)                              | 0.5 (0.4-1.3)                                   |

1  
2  
3  
4  
5  
6  
7  
8  
9  
10  
11  
12  
13  
14  
15  
16  
17  
18  
19  
20  
21  
22  
23  
24  
25  
26  
27  
28  
29  
30  
31  
32  
33  
34  
35  
36  
37  
38  
39  
40  
41  
42  
43  
44  
45  
46

**LR HPV types <sup>2</sup>**

|       |    |               |               |   |               |               |
|-------|----|---------------|---------------|---|---------------|---------------|
| 67    | 2  | 0.0 (0.0-0.1) | 0.3 (0.0-0.8) | - | -             | -             |
| 69    | 1  | 0.0 (0.0-0.1) | 0.2 (0.0-0.5) | - | -             | -             |
| 69/71 | 1  | 0.0 (0.0-0.1) | 0.2 (0.0-0.5) | - | -             | -             |
| 42    | 11 | 0.2 (0.1-0.3) | 1.8 (0.8-2.9) | 6 | 1.9 (0.4-3.4) | 2.7 (0.6-4.9) |
| 84    | 10 | 0.2 (0.1-0.3) | 1.7 (0.6-2.7) | 2 | 0.6 (0.2-1.5) | 0.9 (0.3-2.2) |
| 62    | 9  | 0.2 (0.1-0.3) | 1.5 (0.5-2.5) | 2 | 0.6 (0.2-1.5) | 0.9 (0.3-2.2) |
| 61    | 8  | 0.1 (0.0-0.2) | 1.3 (0.4-2.2) | 2 | 0.6 (0.2-1.5) | 0.9 (0.3-2.2) |
| 6     | 8  | 0.1 (0.0-0.2) | 1.3 (0.4-2.2) | 1 | 0.3 (0.3-0.9) | 0.5 (0.4-1.3) |
| 55    | 2  | 0.0 (0.0-0.1) | 0.3 (0.0-0.8) | 7 | 2.2 (0.6-3.8) | 3.2 (0.9-5.5) |
| 81    | 7  | 0.1 (0.0-0.2) | 1.2 (0.3-2.0) | 2 | 0.6 (0.2-1.5) | 0.9 (0.3-2.2) |
| 89    | 5  | 0.1 (0.0-0.2) | 0.8 (0.1-1.6) | - | -             | -             |
| 54    | 4  | 0.1 (0.0-0.1) | 0.7 (0.0-1.3) | - | -             | -             |
| 11    | 2  | 0.0 (0.0-0.1) | 0.3 (0.0-0.8) | - | -             | -             |
| 43    | 2  | 0.0 (0.0-0.1) | 0.3 (0.0-0.8) | - | -             | -             |
| 72    | 2  | 0.0 (0.0-0.1) | 0.3 (0.0-0.8) | - | -             | -             |
| 83    | 2  | 0.0 (0.0-0.1) | 0.3 (0.0-0.8) | - | -             | -             |
| 40    | 1  | 0.0 (0.0-0.1) | 0.2 (0.0-0.5) | 1 | 0.3 (0.3-0.9) | 0.5 (0.4-1.3) |

**X** **24** **0.4 (0.3-0.6)** **4.0 (2.4-5.6)** **4** **1.3 (0.0-2.5)** **1.8 (0.1-3.6)**

**Multiple types** **317** **5.6 (5.0-6.2)** **52.7 (48.8-56.7)** **116** **36.6 (31.3-41.9)** **53.0 (46.4-59.6)**

**Number of multiple types**

|                 |     |               |                  |    |                  |                  |
|-----------------|-----|---------------|------------------|----|------------------|------------------|
| 2 types         | 153 | 2.7 (2.3-3.1) | 25.5 (22.0-28.9) | 50 | 15.8 (11.8-19.8) | 22.8 (17.3-28.4) |
| 3 types         | 81  | 1.4 (1.1-1.7) | 13.5 (10.7-16.2) | 34 | 10.7 (7.3-14.1)  | 15.5 (10.7-20.3) |
| 4 types         | 57  | 1.0 (0.7-1.3) | 9.5 (7.1-11.8)   | 16 | 5.0 (2.6-7.5)    | 7.3 (3.9-10.8)   |
| 5 or more types | 26  | 0.5 (0.3-0.6) | 4.3 (2.7-6.0)    | 16 | 5.0 (2.6-7.5)    | 7.3 (3.9-10.8)   |

**Most frequent combinations**

|                |     |               |                  |    |                 |                  |
|----------------|-----|---------------|------------------|----|-----------------|------------------|
| 16 with others | 113 | 2.0 (1.6-2.3) | 18.8 (15.7-21.9) | 40 | 12.6 (9.0-16.3) | 18.3 (13.1-23.4) |
|----------------|-----|---------------|------------------|----|-----------------|------------------|

|    |                |    |               |                |    |                |                 |
|----|----------------|----|---------------|----------------|----|----------------|-----------------|
| 1  |                |    |               |                |    |                |                 |
| 2  |                |    |               |                |    |                |                 |
| 3  |                |    |               |                |    |                |                 |
| 4  |                |    |               |                |    |                |                 |
| 5  | 51 with others | 56 | 1.0 (0.7-1.2) | 9.3 (7.0-11.6) | 22 | 6.9 (4.1-9.7)  | 10.0 (6.1-14.0) |
| 6  | 53 with others | 50 | 0.9 (0.6-1.1) | 8.3 (6.1-10.5) | 31 | 9.8 (6.5-13.0) | 14.2 (9.5-18.8) |
| 7  | 31 with others | 38 | 0.7 (0.5-0.9) | 6.3 (4.4-8.3)  | 16 | 5.0 (2.6-7.5)  | 7.3 (3.9-10.8)  |
| 8  | 42 with others | 42 | 0.7 (0.5-1.0) | 7.0 (5.0-9.0)  | 17 | 5.4 (2.9-7.8)  | 7.8 (4.2-11.3)  |
| 9  | 6 with others  | 16 | 0.3 (0.1-0.4) | 2.7 (1.4-3.9)  | 9  | 2.8 (1.0-4.7)  | 4.1 (1.5-6.7)   |
| 10 | 18 with others | 36 | 0.6 (0.4-0.8) | 6.0 (4.1-7.9)  | 6  | 1.9 (0.4-3.4)  | 2.7 (0.6-4.9)   |
| 11 | 33 with others | 17 | 0.3 (0.2-0.4) | 2.8 (1.5-4.2)  | 3  | 0.9 (0.0-2.0)  | 1.4 (0.0-2.9)   |
| 12 | 59 with others | 50 | 0.9 (0.6-1.1) | 8.3 (6.1-10.5) | 17 | 5.4 (2.9-7.8)  | 7.8 (4.2-11.3)  |
| 13 | 39 with others | 27 | 0.5 (0.3-0.7) | 4.5 (2.8-6.1)  | 10 | 3.2 (1.2-5.1)  | 4.6 (1.8-7.3)   |
| 14 | 35 with others | 13 | 0.2 (0.1-0.4) | 2.2 (1.0-3.3)  | 6  | 1.9 (0.4-3.4)  | 2.7 (0.6-4.9)   |
| 15 | 52 with others | 40 | 0.7 (0.5-0.9) | 6.7 (4.7-8.6)  | 14 | 4.4 (2.2-6.7)  | 6.4 (3.2-9.6)   |
| 16 | 56 with others | 29 | 0.5 (0.3-0.7) | 4.8 (3.1-6.5)  | 14 | 4.4 (2.2-6.7)  | 6.4 (3.2-9.6)   |
| 17 | 58 with others | 32 | 0.6 (0.4-0.8) | 5.3 (3.5-7.1)  | 10 | 3.2 (1.2-5.1)  | 4.6 (1.8-7.3)   |
| 18 | 62 with others | 37 | 0.6 (0.4-0.9) | 6.2 (4.2-8.1)  | 9  | 2.8 (1.0-4.7)  | 4.1 (1.5-6.7)   |
| 19 | 61 with others | 29 | 0.5 (0.3-0.7) | 4.8 (3.1-6.5)  | 15 | 4.7 (2.4-7.1)  | 6.8 (3.5-10.2)  |
| 20 | 66 with others | 38 | 0.7 (0.5-0.9) | 6.3 (4.4-8.3)  | 12 | 3.8 (1.7-5.9)  | 5.5 (2.5-8.5)   |
| 21 | 45 with others | 24 | 0.4 (0.3-0.6) | 4.0 (2.4-5.6)  | 10 | 3.2 (1.2-5.1)  | 4.6 (1.8-7.3)   |
| 22 | 68 with others | 22 | 0.4 (0.2-0.5) | 3.7 (2.2-5.2)  | 10 | 3.2 (1.2-5.1)  | 4.6 (1.8-7.3)   |
| 23 | 54 with others | 34 | 0.6 (0.4-0.8) | 5.7 (3.8-7.5)  | 14 | 4.4 (2.2-6.7)  | 6.4 (3.2-9.6)   |
| 24 | 70 with others | 11 | 0.2 (0.1-0.3) | 1.8 (0.8-2.9)  | 4  | 1.3 (0.0-2.5)  | 1.8 (0.1-6.3)   |
| 25 | 84 with others | 30 | 0.5 (0.3-0.7) | 5.0 (3.3-6.7)  | 8  | 2.5 (0.8-4.3)  | 3.7 (1.2-6.1)   |
| 26 | 55 with others | 11 | 0.2 (0.1-0.3) | 1.8 (0.8-2.9)  | 7  | 2.2 (0.6-3.8)  | 3.2 (0.9-5.5)   |
| 27 | 11 with others | 6  | 0.1 (0.0-0.2) | 1.0 (0.2-1.8)  | 2  | 0.6 (0.0-1.5)  | 0.9 (0.3-2.2)   |
| 28 | 81 with others | 19 | 0.3 (0.2-0.5) | 3.2 (1.8-4.6)  | 9  | 2.8 (1.0-4.7)  | 4.1 (1.5-6.7)   |
| 29 | 40 with others | 10 | 0.2 (0.1-0.3) | 1.7 (0.6-2.7)  | -  | -              | -               |
| 30 | 89 with others | 32 | 0.6 (0.4-0.8) | 5.3 (3.5-7.1)  | 14 | 4.4 (2.2-6.7)  | 6.4 (3.2-9.6)   |
| 31 | 67 with others | 9  | 0.2 (0.1-0.3) | 1.5 (0.5-2.5)  | 4  | 1.3 (0.0-2.5)  | 1.8 (0.1-3.6)   |
| 32 |                |    |               |                |    |                |                 |
| 33 |                |    |               |                |    |                |                 |
| 34 |                |    |               |                |    |                |                 |
| 35 |                |    |               |                |    |                |                 |
| 36 |                |    |               |                |    |                |                 |
| 37 |                |    |               |                |    |                |                 |
| 38 |                |    |               |                |    |                |                 |
| 39 |                |    |               |                |    |                |                 |
| 40 |                |    |               |                |    |                |                 |
| 41 |                |    |               |                |    |                |                 |
| 42 |                |    |               |                |    |                |                 |
| 43 |                |    |               |                |    |                |                 |
| 44 |                |    |               |                |    |                |                 |
| 45 |                |    |               |                |    |                |                 |
| 46 |                |    |               |                |    |                |                 |

1  
2  
3  
4  
5  
6  
7  
8  
9  
10  
11  
12  
13  
14  
15  
16  
17  
18  
19  
20  
21  
22  
23  
24  
25  
26  
27  
28  
29  
30  
31  
32  
33  
34  
35  
36  
37  
38  
39  
40  
41  
42  
43  
44  
45  
46

|                                        |     |               |                  |     |                  |                  |
|----------------------------------------|-----|---------------|------------------|-----|------------------|------------------|
| 69 with others                         | 5   | 0.1 (0.0-0.2) | 0.8 (0.1-1.6)    | -   | -                | -                |
| 73 with others                         | 16  | 0.3 (0.1-0.4) | 2.7 (1.4-3.9)    | 7   | 2.2 (0.6-3.8)    | 3.2 (0.9-5.5)    |
| 83 with others                         | 9   | 0.2 (0.1-0.3) | 1.5 (0.5-2.5)    | 6   | 1.9 (0.4-3.4)    | 2.7 (0.6-4.9)    |
| 43 with others                         | 0   | 0.0 (0.0-0.0) | 0.0 (0.0-0.0)    | -   | -                | -                |
| 72 with others                         | 4   | 0.1 (0.0-0.1) | 0.7 (0.0-1.3)    | 4   | 1.3 (0.0-2.5)    | 1.8 (0.1-3.6)    |
| 69/71 with others                      | 2   | 0.0 (0.0-0.1) | 0.3 (0.0-0.8)    | -   | -                | -                |
| 71 with others                         | 6   | 0.1 (0.0-0.2) | 1.0 (0.2-1.8)    | 3   | 0.9 (0.0-2.0)    | 1.4 (0.0-2.9)    |
| 74 with others                         | 5   | 0.1 (0.0-0.2) | 0.8 (0.1-1.6)    | 1   | 0.3 (0.0-0.9)    | 0.5 (0.0-1.3)    |
| 64 with others                         | 1   | 0.0 (0.0-0.1) | 0.2 (0.0-0.5)    | 1   | 0.3 (0.0-0.9)    | 0.5 (0.0-1.3)    |
| 82 with others                         | 10  | 0.2 (0.1-0.3) | 1.7 (0.6-2.7)    | 3   | 0.9 (0.0-2.0)    | 1.4 (0.0-2.9)    |
| <b>Combinations of vaccine types</b>   |     |               |                  |     |                  |                  |
| 6/11 <sup>3</sup>                      | 31  | 0.5 (0.4-0.7) | 5.2 (3.4-6.9)    | 12  | 3.8 (1.7-5.9)    | 5.5 (2.5-8.5)    |
| 16/18 <sup>3</sup>                     | 199 | 3.5 (3.0-4.0) | 33.1 (29.3-36.9) | 62  | 19.6 (15.2-23.9) | 28.3 (22.3-34.3) |
| 6/11/16/18 <sup>3</sup>                | 225 | 4.0 (3.4-4.5) | 37.4 (33.6-41.3) | 72  | 22.7 (18.1-27.3) | 32.9 (26.7-39.1) |
| 6/11/16/18/31/33/45/52/58 <sup>3</sup> | 334 | 5.9 (5.3-6.5) | 55.6 (51.6-59.5) | 110 | 34.7 (29.5-39.9) | 50.2 (43.6-56.9) |

HPV: Human Papillomavirus; HR: High-Risk; LR: Low-Risk; CI: Confidence Interval.  
<sup>1</sup> HR types includes high-risk types and possibly /probably high-risk types: 16, 18, 31, 33, 35, 39, 45, 51, 52, 56, 58, 59, 53, 66, 67, 68, 69, 69/71, 70, 73. <sup>2</sup> LR types includes: 6, 11, 40, 42, 43, 54, 55, 61, 62, 72, 81, 83, 84, 89. <sup>3</sup> One or more of the vaccine types are concerned.

Supplementary Table 5 – Human Papillomavirus (HPV) type-specific distribution of the most common types (n=6,010 women) by result of abnormal cytology.

| HPV type                        | ASCUS (n=214)                |                                            |                                                 | LSIL (n=91)                  |                                            |                                                 | HSIL+ (n=12)                 |                                            |                                                 |
|---------------------------------|------------------------------|--------------------------------------------|-------------------------------------------------|------------------------------|--------------------------------------------|-------------------------------------------------|------------------------------|--------------------------------------------|-------------------------------------------------|
|                                 | Number of HPV positive women | HPV prevalence among all women (%; 95% CI) | HPV prevalence among positive women (%; 95% CI) | Number of HPV positive women | HPV prevalence among all women (%; 95% CI) | HPV prevalence among positive women (%; 95% CI) | Number of HPV positive women | HPV prevalence among all women (%; 95% CI) | HPV prevalence among positive women (%; 95% CI) |
| <b>Any HPV type</b>             | <b>130</b>                   | <b>60.7 (54.2-67.3)</b>                    | <b>-</b>                                        | <b>79</b>                    | <b>86.8 (79.9-93.8)</b>                    | <b>-</b>                                        | <b>10</b>                    | <b>83.3 (62.2-100.0)</b>                   | <b>-</b>                                        |
| <b>Single types</b>             | <b>66</b>                    | <b>30.8 (24.7-37.0)</b>                    | <b>50.8 (42.2-59.4)</b>                         | <b>29</b>                    | <b>31.9 (22.3-41.4)</b>                    | <b>36.7 (26.1-47.3)</b>                         | <b>4</b>                     | <b>33.3 (6.7-60.0)</b>                     | <b>40.0 (9.6-70.4)</b>                          |
| <i>HR HPV types<sup>1</sup></i> |                              |                                            |                                                 |                              |                                            |                                                 |                              |                                            |                                                 |
| 16                              | 13                           | 6.1 (2.9-9.3)                              | 10.0 (4.8-15.2)                                 | 4                            | 4.4 (0.2-8.6)                              | 5.1 (0.2-9.9)                                   | 2                            | 16.7 (0.0-37.8)                            | 20.0 (0.0-44.8)                                 |
| 51                              | 6                            | 2.8 (0.6-5.0)                              | 4.6 (1.0-8.2)                                   | 5                            | 5.5 (0.8-10.2)                             | 6.3 (1.0-11.7)                                  | 1                            | 8.3 (0.0-24.0)                             | 10.0 (0.0-28.6)                                 |
| 53                              | 5                            | 2.3 (0.3-4.4)                              | 3.8 (0.5-7.2)                                   | 2                            | 2.2 (0.0-5.2)                              | 2.5 (0.0-6.0)                                   | -                            | -                                          | -                                               |
| 31                              | 2                            | 0.9 (0.0-2.2)                              | 1.5 (0.0-3.7)                                   | -                            | -                                          | -                                               | -                            | -                                          | -                                               |
| 59                              | 5                            | 2.3 (0.3-4.4)                              | 3.8 (0.5-7.2)                                   | 1                            | 1.1 (0.0-3.2)                              | 1.3 (0.0-3.7)                                   | -                            | -                                          | -                                               |
| 33                              | 1                            | 0.5 (0.0-1.4)                              | 0.8 (0.0-2.3)                                   | -                            | -                                          | -                                               | -                            | -                                          | -                                               |
| 68                              | 5                            | 2.3 (0.3-4.4)                              | 3.8 (0.5-7.2)                                   | 2                            | 2.2 (0.0-5.2)                              | 2.5 (0.0-6.0)                                   | -                            | -                                          | -                                               |
| 70                              | 2                            | 0.9 (0.0-2.2)                              | 1.5 (0.0-3.7)                                   | 2                            | 2.2 (0.0-5.2)                              | 2.5 (0.0-6.0)                                   | -                            | -                                          | -                                               |
| 66                              | -                            | -                                          | -                                               | -                            | -                                          | -                                               | -                            | -                                          | -                                               |
| 52                              | 2                            | 0.9 (0.0-2.2)                              | 1.5 (0.0-3.7)                                   | 1                            | 1.1 (0.0-3.2)                              | 1.3 (0.0-3.7)                                   | -                            | -                                          | -                                               |
| 58                              | 3                            | 1.4 (0.0-3.0)                              | 2.3 (0.0-4.9)                                   | 2                            | 2.2 (0.0-5.2)                              | 2.5 (0.0-6.0)                                   | -                            | -                                          | -                                               |
| 18                              | 1                            | 0.5 (0.0-1.4)                              | 0.8 (0.0-2.3)                                   | -                            | -                                          | -                                               | -                            | -                                          | -                                               |
| 56                              | 2                            | 0.9 (0.0-2.2)                              | 1.5 (0.0-3.7)                                   | 2                            | 2.2 (0.0-5.2)                              | 2.5 (0.0-6.0)                                   | -                            | -                                          | -                                               |
| 35                              | 2                            | 0.9 (0.0-2.2)                              | 1.5 (0.0-3.7)                                   | -                            | -                                          | -                                               | -                            | -                                          | -                                               |
| 39                              | 1                            | 0.5 (0.0-1.4)                              | 0.8 (0.0-2.3)                                   | 1                            | 1.1 (0.0-3.2)                              | 1.3 (0.0-3.7)                                   | -                            | -                                          | -                                               |
| 73                              | -                            | -                                          | -                                               | -                            | -                                          | -                                               | 1                            | 8.3 (0.0-24.0)                             | 10.0 (0.0-28.6)                                 |



|    |                                 |           |                         |                         |           |                         |                         |          |                         |                         |
|----|---------------------------------|-----------|-------------------------|-------------------------|-----------|-------------------------|-------------------------|----------|-------------------------|-------------------------|
| 1  |                                 |           |                         |                         |           |                         |                         |          |                         |                         |
| 2  |                                 |           |                         |                         |           |                         |                         |          |                         |                         |
| 3  |                                 |           |                         |                         |           |                         |                         |          |                         |                         |
| 4  |                                 |           |                         |                         |           |                         |                         |          |                         |                         |
| 5  | 45                              | 1         | 0.5 (0.0-1.4)           | 0.8 (0.0-2.3)           | -         | -                       | -                       | -        | -                       | -                       |
| 6  | 67                              | -         | -                       | -                       | -         | -                       | -                       | -        | -                       | -                       |
| 7  | 69                              | -         | -                       | -                       | -         | -                       | -                       | -        | -                       | -                       |
| 8  | 69/71                           | -         | -                       | -                       | -         | -                       | -                       | -        | -                       | -                       |
| 9  | <b>LR HPV types<sup>2</sup></b> |           |                         |                         |           |                         |                         |          |                         |                         |
| 10 |                                 |           |                         |                         |           |                         |                         |          |                         |                         |
| 11 | 42                              | 3         | 1.4 (0.0-3.0)           | 2.3 (0.0-4.9)           | 3         | 3.3 (0.0-7.0)           | 3.8 (0.0-8.0)           | -        | -                       | -                       |
| 12 | 84                              | 2         | 0.9 (0.0-2.2)           | 1.5 (0.0-3.7)           | -         | -                       | -                       | -        | -                       | -                       |
| 13 | 62                              | 1         | 0.5 (0.0-1.4)           | 0.8 (0.0-2.3)           | 1         | 1.1 (0.0-3.2)           | 1.3 (0.0-3.7)           | -        | -                       | -                       |
| 14 | 61                              | 2         | 0.9 (0.0-2.2)           | 1.5 (0.0-3.7)           | -         | -                       | -                       | -        | -                       | -                       |
| 15 | 6                               | -         | -                       | -                       | 1         | 1.1 (0.0-3.2)           | 1.3 (0.0-3.7)           | -        | -                       | -                       |
| 16 | 55                              | 7         | 3.3 (0.9-5.7)           | 5.4 (1.5-9.3)           | -         | -                       | -                       | -        | -                       | -                       |
| 17 | 81                              | -         | -                       | -                       | 2         | 2.2 (0.0-5.2)           | 2.5 (0.0-6.0)           | -        | -                       | -                       |
| 18 | 89                              | -         | -                       | -                       | -         | -                       | -                       | -        | -                       | -                       |
| 19 | 54                              | -         | -                       | -                       | -         | -                       | -                       | -        | -                       | -                       |
| 20 | 11                              | -         | -                       | -                       | -         | -                       | -                       | -        | -                       | -                       |
| 21 | 43                              | -         | -                       | -                       | -         | -                       | -                       | -        | -                       | -                       |
| 22 | 72                              | -         | -                       | -                       | -         | -                       | -                       | -        | -                       | -                       |
| 23 | 83                              | -         | -                       | -                       | -         | -                       | -                       | -        | -                       | -                       |
| 24 | 40                              | -         | -                       | -                       | -         | -                       | -                       | -        | -                       | -                       |
| 25 |                                 |           |                         |                         |           |                         |                         |          |                         |                         |
| 26 |                                 |           |                         |                         |           |                         |                         |          |                         |                         |
| 27 |                                 |           |                         |                         |           |                         |                         |          |                         |                         |
| 28 |                                 |           |                         |                         |           |                         |                         |          |                         |                         |
| 29 | <b>X</b>                        | <b>3</b>  | <b>1.4 (0.0-3.0)</b>    | <b>2.3 (0.0-4.9)</b>    | <b>1</b>  | <b>1.1 (0.0-3.2)</b>    | <b>1.3 (0.0-3.7)</b>    | -        | -                       | -                       |
| 30 | <b>Multiple types</b>           | <b>61</b> | <b>28.5 (22.5-34.6)</b> | <b>46.9 (38.3-55.5)</b> | <b>49</b> | <b>53.8 (43.6-64.1)</b> | <b>62.0 (51.3-72.7)</b> | <b>6</b> | <b>50.0 (21.7-78.3)</b> | <b>60.0 (29.6-90.4)</b> |
| 31 | <b>Number of</b>                |           |                         |                         |           |                         |                         |          |                         |                         |
| 32 | <b>multiple types</b>           |           |                         |                         |           |                         |                         |          |                         |                         |
| 33 |                                 |           |                         |                         |           |                         |                         |          |                         |                         |
| 34 | 2 types                         | 28        | 13.1 (8.6-17.6)         | 21.5 (14.5-28.6)        | 20        | 22.0 (13.5-30.5)        | 25.3 (15.7-34.9)        | 2        | 16.7 (0.0-37.8)         | 20.0 (0.0-44.8)         |
| 35 | 3 types                         | 19        | 8.9 (5.1-12.7)          | 14.6 (8.5-20.7)         | 12        | 13.2 (6.2-20.1)         | 15.2 (7.3-23.1)         | 3        | 25.0 (0.5-49.5)         | 30.0 (1.6-58.4)         |
| 36 | 4 types                         | 9         | 4.2 (1.5-6.9)           | 6.9 (2.6-11.3)          | 7         | 7.7 (2.2-13.2)          | 8.9 (2.6-15.1)          | 0        | 0.0 (0.0-0.0)           | 0.0 (0.0-0.0)           |
| 37 | 5 or more types                 | 5         | 2.3 (0.3-4.4)           | 3.8 (0.5-7.2)           | 10        | 11.0 (4.6-17.4)         | 12.7 (5.3-20.0)         | 1        | 8.3 (0.0-24.0)          | 10.0 (0.0-28.6)         |
| 38 |                                 |           |                         |                         |           |                         |                         |          |                         |                         |
| 39 |                                 |           |                         |                         |           |                         |                         |          |                         |                         |
| 40 |                                 |           |                         |                         |           |                         |                         |          |                         |                         |
| 41 |                                 |           |                         |                         |           |                         |                         |          |                         |                         |
| 42 |                                 |           |                         |                         |           |                         |                         |          |                         |                         |
| 43 |                                 |           |                         |                         |           |                         |                         |          |                         |                         |
| 44 |                                 |           |                         |                         |           |                         |                         |          |                         |                         |
| 45 |                                 |           |                         |                         |           |                         |                         |          |                         |                         |
| 46 |                                 |           |                         |                         |           |                         |                         |          |                         |                         |

1  
2  
3  
4 **Most frequent**  
5 **combinations**  
6

|    |                |    |                |                 |    |                 |                 |   |                 |                 |
|----|----------------|----|----------------|-----------------|----|-----------------|-----------------|---|-----------------|-----------------|
| 7  | 16 with others | 16 | 7.5 (4.0-11.0) | 12.3 (6.7-18.0) | 22 | 24.2 (15.4-33)  | 27.8 (18-37.7)  | 2 | 16.7 (0.0-37.8) | 20.0 (0.0-44.8) |
| 8  | 51 with others | 12 | 5.6 (2.5-8.7)  | 9.2 (4.3-14.2)  | 9  | 9.9 (3.8-16.0)  | 11.4 (4.4-18.4) | 1 | 8.3 (0.0-24.0)  | 10.0 (0.0-28.6) |
| 9  | 53 with others | 16 | 7.5 (4.0-11.0) | 12.3 (6.7-18.0) | 14 | 15.4 (8.0-22.8) | 17.7 (9.3-26.1) | 1 | 8.3 (0.0-24.0)  | 10.0 (0.0-28.6) |
| 10 | 31 with others | 7  | 3.3 (0.9-5.7)  | 5.4 (1.5-9.3)   | 6  | 6.6 (1.5-11.7)  | 7.6 (1.8-13.4)  | 3 | 25.0 (0.5-49.5) | 30.0 (1.6-58.4) |
| 11 | 42 with others | 9  | 4.2 (1.5-6.9)  | 6.9 (2.6-11.3)  | 7  | 7.7 (2.2-13.2)  | 8.9 (2.6-15.1)  | 1 | 8.3 (0.0-24.0)  | 10.0 (0.0-28.6) |
| 12 | 6 with others  | 5  | 2.3 (0.3-4.4)  | 3.8 (0.5-7.2)   | 4  | 4.4 (0.2-8.6)   | 5.1 (0.2-9.9)   | - | -               | -               |
| 13 | 18 with others | 2  | 0.9 (0.0-2.2)  | 1.5 (0.0-3.7)   | 4  | 4.4 (0.2-8.6)   | 5.1 (0.2-9.9)   | - | -               | -               |
| 14 | 33 with others | 1  | 0.5 (0.0-1.4)  | 0.8 (0.0-2.3)   | 2  | 2.2 (0.0-5.2)   | 2.5 (0.0-6.0)   | - | -               | -               |
| 15 | 59 with others | 8  | 3.7 (1.2-6.3)  | 6.2 (2.0-10.3)  | 8  | 8.8 (3.0-14.6)  | 10.1 (3.5-16.8) | 1 | 8.3 (0.0-24.0)  | 10.0 (0.0-28.6) |
| 16 | 39 with others | 8  | 3.7 (1.2-6.3)  | 6.2 (2.0-10.3)  | 1  | 1.1 (0.0-3.2)   | 1.3 (0.0-3.7)   | 1 | 8.3 (0.0-24.0)  | 10.0 (0.0-28.6) |
| 17 | 35 with others | 3  | 1.4 (0.0-3.0)  | 2.3 (0.0-4.9)   | 2  | 2.2 (0.0-5.2)   | 2.5 (0.0-6.0)   | 1 | 8.3 (0.0-24.0)  | 10.0 (0.0-28.6) |
| 18 | 52 with others | 4  | 1.9 (0.1-3.7)  | 3.1 (0.1-6.0)   | 8  | 8.8 (3.0-14.6)  | 10.1 (3.5-16.8) | 2 | 16.7 (0.0-37.8) | 20.0 (0.0-44.8) |
| 19 | 56 with others | 6  | 2.8 (0.6-5.0)  | 4.6 (1.0-8.2)   | 8  | 8.8 (3.0-14.6)  | 10.1 (3.5-16.8) | - | -               | -               |
| 20 | 58 with others | 5  | 2.3 (0.3-4.4)  | 3.8 (0.5-7.2)   | 5  | 5.5 (0.8-10.2)  | 6.3 (1.0-11.7)  | - | -               | -               |
| 21 | 62 with others | 5  | 2.3 (0.3-4.4)  | 3.8 (0.5-7.2)   | 4  | 4.4 (0.2-8.6)   | 5.1 (0.2-9.9)   | - | -               | -               |
| 22 | 61 with others | 7  | 3.3 (0.9-5.7)  | 5.4 (1.5-9.3)   | 8  | 8.8 (3.0-14.6)  | 10.1 (3.5-16.8) | - | -               | -               |
| 23 | 66 with others | 6  | 2.8 (0.6-5.0)  | 4.6 (1.0-8.2)   | 6  | 6.6 (1.5-11.7)  | 7.6 (1.8-13.4)  | - | -               | -               |
| 24 | 45 with others | 3  | 1.4 (0.0-3.0)  | 2.3 (0.0-4.9)   | 4  | 4.4 (0.2-8.6)   | 5.1 (0.2-9.9)   | 3 | 25 (0.5-49.5)   | 30.0 (1.6-58.4) |
| 25 | 68 with others | 6  | 2.8 (0.6-5.0)  | 4.6 (1.0-8.2)   | 3  | 3.3 (0.0-7.0)   | 3.8 (0.0-8.0)   | 1 | 8.3 (0.0-24.0)  | 10.0 (0.0-28.6) |
| 26 | 54 with others | 8  | 3.7 (1.2-6.3)  | 6.2 (2.0-10.3)  | 4  | 4.4 (0.2-8.6)   | 5.1 (0.2-9.9)   | - | -               | -               |
| 27 | 70 with others | 1  | 0.5 (0.0-1.4)  | 0.8 (0.0-2.3)   | 3  | 3.3 (0.0-7.0)   | 3.8 (0.0-8.0)   | - | -               | -               |
| 28 | 84 with others | 4  | 1.9 (0.1-3.7)  | 3.1 (0.1-6.0)   | 4  | 4.4 (0.2-8.6)   | 5.1 (0.2-9.9)   | - | -               | -               |
| 29 | 55 with others | 4  | 1.9 (0.1-3.7)  | 3.1 (0.1-6.0)   | 3  | 3.3 (0.0-7.0)   | 3.8 (0.0-8.0)   | - | -               | -               |
| 30 | 11 with others | 1  | 0.5 (0.0-1.4)  | 0.8 (0.0-2.3)   | 1  | 1.1 (0.0-3.2)   | 1.3 (0.0-3.7)   | - | -               | -               |
| 31 | 81 with others | 6  | 2.8 (0.6-5.0)  | 4.6 (1.0-8.2)   | 3  | 3.3 (0.0-7.0)   | 3.8 (0.0-8.0)   | - | -               | -               |

|    |                         |    |                  |                  |    |                  |                  |   |                  |                   |
|----|-------------------------|----|------------------|------------------|----|------------------|------------------|---|------------------|-------------------|
| 1  |                         |    |                  |                  |    |                  |                  |   |                  |                   |
| 2  |                         |    |                  |                  |    |                  |                  |   |                  |                   |
| 3  |                         |    |                  |                  |    |                  |                  |   |                  |                   |
| 4  | 40 with others          | -  | -                | -                | -  | -                | -                | - | -                | -                 |
| 5  |                         |    |                  |                  |    |                  |                  |   |                  |                   |
| 6  | 89 with others          | 8  | 3.7 (1.2-6.3)    | 6.2 (2.0-10.3)   | 6  | 6.6 (1.5-11.7)   | 7.6 (1.8-13.4)   | - | -                | -                 |
| 7  | 67 with others          | 3  | 1.4 (0.0-3.0)    | 2.3 (0.0-4.9)    | 1  | 1.1 (0.0-3.2)    | 1.3 (0.0-3.7)    | - | -                | -                 |
| 8  | 69 with others          | -  | -                | -                | -  | -                | -                | - | -                | -                 |
| 9  |                         |    |                  |                  |    |                  |                  |   |                  |                   |
| 10 | 73 with others          | 3  | 1.4 (0.0-3.0)    | 2.3 (0.0-4.9)    | 4  | 4.4 (0.2-8.6)    | 5.1 (0.2-9.9)    | 0 | 0.0 (0.0-0.0)    | 0.0 (0.0-0.0)     |
| 11 | 83 with others          | 5  | 2.3 (0.3-4.4)    | 3.8 (0.5-7.2)    | 1  | 1.1 (0.0-3.2)    | 1.3 (0.0-3.7)    | - | -                | -                 |
| 12 | 43 with others          | -  | -                | -                | -  | -                | -                | - | -                | -                 |
| 13 |                         |    |                  |                  |    |                  |                  |   |                  |                   |
| 14 | 72 with others          | 1  | 0.5 (0.0-1.4)    | 0.8 (0.0-2.3)    | 3  | 3.3 (0.0-7.0)    | 3.8 (0.0-8.0)    | - | -                | -                 |
| 15 | 69/71 with others       | -  | -                | -                | -  | -                | -                | - | -                | -                 |
| 16 | 71 with others          | 2  | 0.9 (0.0-2.2)    | 1.5 (0.0-3.7)    | 1  | 1.1 (0.0-3.2)    | 1.3 (0.0-3.7)    | - | -                | -                 |
| 17 | 74 with others          | 1  | 0.5 (0.0-1.4)    | 0.8 (0.0-2.3)    | -  | -                | -                | - | -                | -                 |
| 18 |                         |    |                  |                  |    |                  |                  |   |                  |                   |
| 19 | 64 with others          | 1  | 0.5 (0.0-1.4)    | 0.8 (0.0-2.3)    | -  | -                | -                | - | -                | -                 |
| 20 | 82 with others          | 2  | 0.9 (0.0-2.2)    | 1.5 (0.0-3.7)    | -  | -                | -                | 1 | 8.3 (0.0-24.0)   | 10.0 (0.0-28.6)   |
| 21 | <b>Combinations of</b>  |    |                  |                  |    |                  |                  |   |                  |                   |
| 22 | <b>vaccine types</b>    |    |                  |                  |    |                  |                  |   |                  |                   |
| 23 |                         |    |                  |                  |    |                  |                  |   |                  |                   |
| 24 | 6/11 <sup>3</sup>       | 6  | 2.8 (0.6-5.0)    | 4.6 (1.0-8.2)    | 6  | 6.6 (1.5-11.7)   | 7.6 (1.8-13.4)   | - | -                | -                 |
| 25 | 16/18 <sup>3</sup>      | 31 | 14.5 (9.8-19.2)  | 23.8 (16.5-31.2) | 27 | 29.7 (20.3-39.1) | 34.2 (23.7-44.6) | 4 | 33.3 (6.7-60.0)  | 40.0 (9.6-70.4)   |
| 26 | 6/11/16/18 <sup>3</sup> | 37 | 17.3 (12.2-22.4) | 28.5 (20.7-36.2) | 31 | 34.1 (24.3-43.8) | 39.2 (28.5-50.0) | 4 | 33.3 (6.7-60.0)  | 40.0 (9.6-70.4)   |
| 27 | 6/11/16/18/31/33        |    |                  |                  |    |                  |                  |   |                  |                   |
| 28 | /45/52/58 <sup>3</sup>  | 57 | 26.6 (20.7-32.6) | 43.8 (35.3-52.4) | 45 | 49.5 (39.2-59.7) | 57.0 (46.0-67.9) | 8 | 66.7 (40.0-93.3) | 80.0 (55.2-100.0) |
| 29 |                         |    |                  |                  |    |                  |                  |   |                  |                   |
| 30 |                         |    |                  |                  |    |                  |                  |   |                  |                   |

HPV: Human Papillomavirus; HR: High-Risk; LR: Low-Risk; CI: Confidence Interval.  
<sup>1</sup> HR types includes high-risk types and possibly /probably high-risk types: 16, 18, 31, 33, 35, 39, 45, 51, 52, 56, 58, 59, 53, 66, 67, 68, 69, 69/71, 70, 73. <sup>2</sup> LR types includes: 6, 11, 40, 42, 43, 54, 55, 61, 62, 72, 81, 83, 84, 89. <sup>3</sup> One or more of the vaccine types are concerned.

Supplementary Table 6 – Crude and multivariate analyses of the association between cervical High-Risk Human Papillomavirus (HR HPV) infection and selected subjects' characteristics (n=5,858 women).

| Study sample characteristics    | Number of HR HPV positive women / number of HPV tested women (negative + HR HPV positive) | HPV prevalence (%) | Adjusted model <sup>1</sup> POR (95% CI) |
|---------------------------------|-------------------------------------------------------------------------------------------|--------------------|------------------------------------------|
| <b>Population</b>               |                                                                                           |                    |                                          |
| Gran Canaria                    | 407 / 3,753                                                                               | 10.8               | 1.0 (ref)                                |
| Tenerife                        | 261 / 2,105                                                                               | 12.4               | 1.0 (0.8-1.2)                            |
| <b>Age distribution (years)</b> |                                                                                           |                    |                                          |
| 18-24                           | 135 / 549                                                                                 | 24.6               | <b>2.9 (1.7-4.8)</b>                     |
| 25-29                           | 129 / 639                                                                                 | 20.2               | <b>2.2 (1.3-3.5)</b>                     |
| 30-34                           | 136 / 869                                                                                 | 15.7               | <b>1.7 (1.0-2.7)</b>                     |
| 35-39                           | 71 / 865                                                                                  | 8.2                | 0.9 (0.5-1.4)                            |
| 40-44                           | 67 / 771                                                                                  | 8.7                | 1.0 (0.6-1.6)                            |
| 45-49                           | 44 / 607                                                                                  | 7.2                | 0.8 (0.5-1.3)                            |
| 50-54                           | 30 / 594                                                                                  | 5.1                | 0.6 (0.4-1.1)                            |
| 55-59                           | 27 / 480                                                                                  | 5.6                | 0.8 (0.5-1.4)                            |
| 60-65                           | 29 / 484                                                                                  | 6.0                | 1.0 (ref)                                |
|                                 | <i>p-value for trend</i>                                                                  |                    | <b><i>p</i>&lt;0.001</b>                 |
| <b>Level of education</b>       |                                                                                           |                    |                                          |
| None / Preschool                | 29 / 438                                                                                  | 6.6                | 1.0 (ref)                                |
| Primary                         | 246 / 2,588                                                                               | 9.5                | 0.9 (0.6-1.5)                            |
| Secondary                       | 201 / 1,437                                                                               | 14.0               | 0.9 (0.5-1.3)                            |
| University or higher            | 178 / 1,296                                                                               | 13.7               | 0.9 (0.5-1.4)                            |
| Others                          | 13 / 90                                                                                   | 14.4               | 0.8 (0.4-1.8)                            |
| Missing data                    | 1 / 9                                                                                     | -                  | -                                        |
|                                 | <i>p-value for trend (excluding others)</i>                                               |                    | <i>p</i> =0.3                            |
| <b>Marital status</b>           |                                                                                           |                    |                                          |
| Single                          | 283 / 1,333                                                                               | 21.2               | <b>1.5 (1.2-1.9)</b>                     |
| Married/de facto partnership    | 267 / 3,792                                                                               | 7.0                | 1.0 (ref)                                |
| Divorced/separated              | 99 / 541                                                                                  | 18.3               | <b>2.0 (1.5-2.7)</b>                     |
| Widowed                         | 18 / 184                                                                                  | 9.8                | <b>1.8 (1.0-3.1)</b>                     |
| Missing data                    | 1 / 8                                                                                     | -                  | -                                        |
| <b>Number of live births</b>    |                                                                                           |                    |                                          |
| No <sup>2</sup>                 | 240 / 1,307                                                                               | 18.4               | 1.0 (ref)                                |
| 1                               | 137 / 1,202                                                                               | 11.4               | 0.9 (0.7-1.2)                            |
| 2                               | 136 / 1,725                                                                               | 7.9                | 1.0 (0.8-1.4)                            |
| 3                               | 53 / 754                                                                                  | 7.0                | 1.1 (0.7-1.6)                            |
| ≥4                              | 27 / 448                                                                                  | 6.0                | 1.0 (0.6-1.7)                            |
| Missing data                    | 75 / 422                                                                                  | -                  | -                                        |
| <b>Smoking status</b>           |                                                                                           |                    |                                          |
| Never smoked                    | 298 / 3,324                                                                               | 9.0                | 1.0 (ref)                                |
| Ex smoker                       | 102 / 876                                                                                 | 11.6               | 1.2 (0.9-1.5)                            |

|                                                |                           |             |      |                       |
|------------------------------------------------|---------------------------|-------------|------|-----------------------|
|                                                | Current smoker            | 268 / 1,658 | 16.2 | <b>1.3 (1.1-1.6)</b>  |
| <b>Age at first sexual intercourse (years)</b> |                           |             |      |                       |
|                                                | <15                       | 35 / 179    | 19.6 | 1.0 (0.5-1.8)         |
|                                                | 15-16                     | 136 / 787   | 17.3 | 1.0 (0.6-1.6)         |
|                                                | 17-18                     | 235 / 1,797 | 13.1 | 1.0 (0.6-1.6)         |
|                                                | 19-20                     | 118 / 1,241 | 9.5  | 1.0 (0.6-1.5)         |
|                                                | 21-25                     | 112 / 1,368 | 8.2  | 1.2 (0.7-1.8)         |
|                                                | >25                       | 26 / 418    | 6.2  | 1.0 (ref)             |
|                                                | Missing data              | 6 / 68      | -    | -                     |
|                                                | <i>p-value for trend</i>  |             |      | <i>p=0.6</i>          |
| <b>Lifetime number of sexual partners</b>      |                           |             |      |                       |
|                                                | 1                         | 160 / 3,135 | 5.1  | 1.0 (ref)             |
|                                                | 2-3                       | 224 / 1,495 | 15.0 | <b>2.3 (1.9-2.9)</b>  |
|                                                | 4-5                       | 124 / 596   | 20.8 | <b>3.1 (2.3-4.0)</b>  |
|                                                | 6-10                      | 100 / 376   | 26.6 | <b>4.1 (3.0-5.6)</b>  |
|                                                | 11-20                     | 36 / 121    | 29.8 | <b>4.6 (2.9-7.3)</b>  |
|                                                | >20                       | 16 / 47     | 34.0 | <b>7.1 (3.7-13.6)</b> |
|                                                | Missing data              | 8 / 88      | -    | -                     |
|                                                | <i>p-value for trend</i>  |             |      | <i>p&lt;0.001</i>     |
| <b>Use of oral contraceptives</b>              |                           |             |      |                       |
|                                                | Never                     | 126 / 1,366 | 9.2  | 1.0 (ref)             |
|                                                | Ever                      | 542 / 4,492 | 12.1 | 1.2 (0.97-1.5)        |
| <b>Rhythm method/coitus interruptus</b>        |                           |             |      |                       |
|                                                | Never                     | 316 / 2,933 | 10.8 | 1.0 (ref)             |
|                                                | Ever                      | 352 / 2,925 | 12.0 | 1.1 (0.96-1.4)        |
| <b>Previous cervical lesions</b>               |                           |             |      |                       |
|                                                | No                        | 527 / 4,868 | 10.8 | 1.0 (ref)             |
|                                                | Yes                       | 70 / 364    | 19.2 | <b>1.5 (1.1-2.0)</b>  |
|                                                | Missing data <sup>3</sup> | 71 / 626    | -    | -                     |
| <b>Genital warts</b>                           |                           |             |      |                       |
|                                                | Never                     | 633 / 5,744 | 11.0 | 1.0 (ref)             |
|                                                | Ever                      | 35 / 114    | 30.7 | <b>2.0 (1.3-3.2)</b>  |

<sup>1</sup> Adjusted model: adjusted for age group, population, level of education, marital status, smoking habits, lifetime number of sexual partners, previous cervical lesions, and ever had genital warts. <sup>2</sup> Includes women who were pregnant but had 0 live births. <sup>3</sup> Includes "Do not know" in the "Missing data" category. <sup>4</sup> Includes syphilis, genital herpes, gonorrhoea, HIV (positive test), genital warts, Chlamydia, genital ulcer, others. <sup>5</sup> Excludes ever had genital warts in the adjustment.

STROBE Statement—Checklist of items that should be included in reports of *cross-sectional studies*

|                           | Item No | Recommendation                                                                                                                                                                                    | Reported on page # |
|---------------------------|---------|---------------------------------------------------------------------------------------------------------------------------------------------------------------------------------------------------|--------------------|
| <b>Title and abstract</b> | 1       | (a) Indicate the study's design with a commonly used term in the title or the abstract                                                                                                            | 1                  |
|                           |         | (b) Provide in the abstract an informative and balanced summary of what was done and what was found                                                                                               | 3                  |
| <b>Introduction</b>       |         |                                                                                                                                                                                                   |                    |
| Background/rationale      | 2       | Explain the scientific background and rationale for the investigation being reported                                                                                                              | 5                  |
| Objectives                | 3       | State specific objectives, including any prespecified hypotheses                                                                                                                                  | 5                  |
| <b>Methods</b>            |         |                                                                                                                                                                                                   |                    |
| Study design              | 4       | Present key elements of study design early in the paper                                                                                                                                           | 6                  |
| Setting                   | 5       | Describe the setting, locations, and relevant dates, including periods of recruitment, exposure, follow-up, and data collection                                                                   | 6                  |
| Participants              | 6       | (a) Give the eligibility criteria, and the sources and methods of selection of participants                                                                                                       | 6                  |
| Variables                 | 7       | Clearly define all outcomes, exposures, predictors, potential confounders, and effect modifiers. Give diagnostic criteria, if applicable                                                          |                    |
| Data sources/measurement  | 8*      | For each variable of interest, give sources of data and details of methods of assessment (measurement). Describe comparability of assessment methods if there is more than one group              |                    |
| Bias                      | 9       | Describe any efforts to address potential sources of bias                                                                                                                                         |                    |
| Study size                | 10      | Explain how the study size was arrived at                                                                                                                                                         | 6                  |
| Quantitative variables    | 11      | Explain how quantitative variables were handled in the analyses. If applicable, describe which groupings were chosen and why                                                                      |                    |
| Statistical methods       | 12      | (a) Describe all statistical methods, including those used to control for confounding                                                                                                             | 7                  |
|                           |         | (b) Describe any methods used to examine subgroups and interactions                                                                                                                               | 7-8                |
|                           |         | (c) Explain how missing data were addressed                                                                                                                                                       | 7-8                |
|                           |         | (d) If applicable, describe analytical methods taking account of sampling strategy                                                                                                                | 8                  |
|                           |         | (e) Describe any sensitivity analyses                                                                                                                                                             | 8                  |
| <b>Results</b>            |         |                                                                                                                                                                                                   |                    |
| Participants              | 13*     | (a) Report numbers of individuals at each stage of study—eg numbers potentially eligible, examined for eligibility, confirmed eligible, included in the study, completing follow-up, and analysed | 8                  |
|                           |         | (b) Give reasons for non-participation at each stage                                                                                                                                              | 8                  |
|                           |         | (c) Consider use of a flow diagram                                                                                                                                                                |                    |
| Descriptive data          | 14*     | (a) Give characteristics of study participants (eg demographic, clinical, social) and information on exposures and potential confounders                                                          | 8-10               |
|                           |         | (b) Indicate number of participants with missing data for each variable of interest                                                                                                               |                    |
| Outcome data              | 15*     | Report numbers of outcome events or summary measures                                                                                                                                              |                    |
| Main results              | 16      | (a) Give unadjusted estimates and, if applicable, confounder-adjusted estimates and their precision (eg, 95% confidence interval). Make clear                                                     | 11-16              |

1  
2  
3  
4  
5  
6  
7  
8  
9  
10  
11  
12  
13  
14  
15  
16  
17  
18  
19  
20  
21  
22  
23  
24  
25  
26  
27  
28  
29  
30  
31  
32  
33  
34  
35  
36  
37  
38  
39  
40  
41  
42  
43  
44  
45  
46  
47  
48  
49  
50  
51  
52  
53  
54  
55  
56  
57  
58  
59  
60

|                          |    |                                                                                                                                                                            |       |
|--------------------------|----|----------------------------------------------------------------------------------------------------------------------------------------------------------------------------|-------|
|                          |    | which confounders were adjusted for and why they were included                                                                                                             |       |
|                          |    | (b) Report category boundaries when continuous variables were categorized                                                                                                  |       |
|                          |    | (c) If relevant, consider translating estimates of relative risk into absolute risk for a meaningful time period                                                           |       |
| Other analyses           | 17 | Report other analyses done—eg analyses of subgroups and interactions, and sensitivity analyses                                                                             |       |
| <b>Discussion</b>        |    |                                                                                                                                                                            |       |
| Key results              | 18 | Summarise key results with reference to study objectives                                                                                                                   | 17    |
| Limitations              | 19 | Discuss limitations of the study, taking into account sources of potential bias or imprecision. Discuss both direction and magnitude of any potential bias                 | 22    |
| Interpretation           | 20 | Give a cautious overall interpretation of results considering objectives, limitations, multiplicity of analyses, results from similar studies, and other relevant evidence | 22-23 |
| Generalisability         | 21 | Discuss the generalisability (external validity) of the study results                                                                                                      |       |
| <b>Other information</b> |    |                                                                                                                                                                            |       |
| Funding                  | 22 | Give the source of funding and the role of the funders for the present study and, if applicable, for the original study on which the present article is based              | 24    |

\*Give information separately for exposed and unexposed groups.

**Note:** An Explanation and Elaboration article discusses each checklist item and gives methodological background and published examples of transparent reporting. The STROBE checklist is best used in conjunction with this article (freely available on the Web sites of PLoS Medicine at <http://www.plosmedicine.org/>, Annals of Internal Medicine at <http://www.annals.org/>, and Epidemiology at <http://www.epidem.com/>). Information on the STROBE Initiative is available at [www.strobe-statement.org](http://www.strobe-statement.org).
