# Supplementary material for: Prevalence and genotype distribution of cervical human papilomavirus infection in the pre-vaccination era: a population-based study in the Canary Islands
Source: PubMed Central journal article supplement — BMJ Open. 2020 Sep 24;10(9):e037402. doi: 10.1136/bmjopen-2020-037402 (PMC7517562; doi:10.1136/bmjopen-2020-037402), 2020-09-24
Supplement: bmjopen-2020-037402supp001.pdf [file bmjopen-2020-037402supp001.pdf]

Supplementary Table 1 – Characteristics of the study participants by population.

| Study sample characteristics                    | GRAN CANARIA<br>(GENERAL POP.)<br>(n=3,212) | GRAN CANARIA<br>(VOLUNTEERS)<br>(n=665) | TENERIFE<br>(n=2,214) |
|-------------------------------------------------|---------------------------------------------|-----------------------------------------|-----------------------|
|                                                 | N (%)                                       | N (%)                                   | N (%)                 |
| <b>Age distribution (years)</b>                 | $P(GCgp-TF)=0.08^5$                         | $P(GCgp-GCv)=0.003^6$                   | $P(GC-TF)=0.07^7$     |
| 18-24                                           | 276 (8.6)                                   | 65 (9.8)                                | 231 (10.4)            |
| 25-29                                           | 374 (11.6)                                  | 59 (8.9)                                | 230 (10.4)            |
| 30-34                                           | 480 (14.9)                                  | 94 (14.1)                               | 331 (15.0)            |
| 35-39                                           | 460 (14.3)                                  | 110 (16.5)                              | 332 (15.0)            |
| 40-44                                           | 435 (13.5)                                  | 88 (13.2)                               | 270 (12.2)            |
| 45-49                                           | 342 (10.6)                                  | 86 (12.9)                               | 203 (9.2)             |
| 50-54                                           | 307 (9.6)                                   | 65 (9.8)                                | 241 (10.9)            |
| 55-59                                           | 254 (7.9)                                   | 66 (9.9)                                | 182 (8.2)             |
| 60-65                                           | 284 (8.8)                                   | 32 (4.8)                                | 194 (8.8)             |
| <b>Level of education</b>                       | $P(GCgp-TF)<0.001^5$                        | $P(GCgp-GCv)<0.001^6$                   | $P(GC-TF)<0.001^7$    |
| None                                            | 94 (2.9)                                    | 11 (1.7)                                | 65 (2.9)              |
| Preschool                                       | 167 (5.2)                                   | 22 (3.3)                                | 99 (4.5)              |
| Primary                                         | 1610 (50.2)                                 | 301 (45.3)                              | 771 (34.8)            |
| Secondary                                       | 778 (24.3)                                  | 188 (28.3)                              | 533 (24.1)            |
| Certificate of advanced study                   | 339 (10.6)                                  | 97 (14.6)                               | 319 (14.4)            |
| Bachelor's degree                               | 190 (5.9)                                   | 42 (6.3)                                | 358 (16.2)            |
| Others                                          | 26 (0.8)                                    | 3 (0.5)                                 | 69 (3.1)              |
| Missing data                                    | 8 (-)                                       | 1 (-)                                   | 0 (-)                 |
| <b>Marital status</b>                           | $P(GCgp-TF)<0.001^5$                        | $P(GCgp-GCv)<0.001^6$                   | $P(GC-TF)=0.03^7$     |
| Single                                          | 757 (23.6)                                  | 148 (22.3)                              | 491 (22.2)            |
| Married/de facto partnership                    | 2106 (65.7)                                 | 408 (61.4)                              | 1405 (63.5)           |
| Divorced/separated                              | 247 (7.7)                                   | 90 (13.6)                               | 236 (10.7)            |
| Widowed                                         | 97 (3.0)                                    | 18 (2.7)                                | 80 (3.6)              |
| Missing data                                    | 5 (-)                                       | 1 (-)                                   | 2 (-)                 |
| <b>Pregnancies</b>                              | $P(GCgp-TF)=0.6^5$                          | $P(GCgp-GCv)=0.9^6$                     | $P(GC-TF)=0.6^7$      |
| No                                              | 701 (22.2)                                  | 147 (22.6)                              | 495 (23.0)            |
| Yes                                             | 2450 (77.8)                                 | 504 (77.4)                              | 1659 (77.0)           |
| Missing data                                    | 61 (-)                                      | 14 (-)                                  | 60 (-)                |
| <b>Number of live births<sup>1</sup></b>        | $P(GCgp-TF)=0.6^5$                          | $P(GCgp-GCv)=0.02^6$                    | $P(GC-TF)=0.7^7$      |
| 0                                               | 11 (0.5)                                    | 4 (0.8)                                 | 13 (0.9)              |
| 1                                               | 669 (29.2)                                  | 120 (25.1)                              | 448 (29.3)            |
| 2                                               | 936 (40.8)                                  | 219 (45.7)                              | 631 (41.3)            |
| 3                                               | 440 (19.2)                                  | 72 (15.0)                               | 277 (18.1)            |
| 4                                               | 136 (5.9)                                   | 41 (8.6)                                | 100 (6.5)             |
| ≥5                                              | 103 (4.5)                                   | 23 (4.8)                                | 60 (3.9)              |
| Missing data                                    | 155 (-)                                     | 25 (-)                                  | 130 (-)               |
| <b>Sexually transmitted disease<sup>2</sup></b> | $P(GCgp-TF)=0.1^5$                          | $P(GCgp-GCv)=0.4^6$                     | $P(GC-TF)=0.2^7$      |
| Never                                           | 3113 (96.9)                                 | 640 (96.2)                              | 2129 (96.2)           |
| Ever                                            | 99 (3.1)                                    | 25 (3.8)                                | 85 (3.8)              |
| <b>Smoking status</b>                           | $P(GCgp-TF)<0.001^5$                        | $P(GCgp-GCv)=0.04^6$                    | $P(GC-TF)<0.001^7$    |
| Never smoked                                    | 1897 (59.1)                                 | 375 (56.4)                              | 1171 (52.9)           |
| Ex smoker                                       | 454 (14.1)                                  | 120 (18)                                | 339 (15.3)            |
| Current smoker                                  | 861 (26.8)                                  | 170 (25.6)                              | 704 (31.8)            |
| <b>Previous cervical pap smears</b>             | $P(GCgp-TF)<0.001^5$                        | $P(GCgp-GCv)=0.02^6$                    | $P(GC-TF)<0.001^7$    |

|                                                |                      |                       |                    |
|------------------------------------------------|----------------------|-----------------------|--------------------|
| None                                           | 85 (2.6)             | 21 (3.2)              | 110 (5)            |
| 1                                              | 281 (8.7)            | 32 (4.8)              | 180 (8.1)          |
| 2-3                                            | 561 (17.5)           | 128 (19.2)            | 367 (16.6)         |
| 4-5                                            | 406 (12.6)           | 77 (11.6)             | 289 (13.1)         |
| >5                                             | 1704 (53.1)          | 371 (55.8)            | 1198 (54.1)        |
| Do not know                                    | 175 (5.4)            | 36 (5.4)              | 70 (3.2)           |
| <b>Previous cervical lesions<sup>3</sup></b>   | $P(GCgp-TF)=0.09^5$  | $P(GCgp-GCv)=0.3^6$   | $P(GC-TF)=0.2^7$   |
| No                                             | 2561 (92.9)          | 521 (91.7)            | 1755 (92.2)        |
| Yes                                            | 190 (6.9)            | 47 (8.3)              | 148 (7.8)          |
| Do not know                                    | 5 (0.2)              | 0 (0.0)               | 0 (0.0)            |
| Missing data                                   | 371 (-)              | 76 (-)                | 201 (-)            |
| <b>Age at first sexual intercourse (years)</b> | $P(GCgp-TF)=0.007^5$ | $P(GCgp-GCv)=0.2^6$   | $P(GC-TF)=0.006^7$ |
| <15                                            | 92 (2.9)             | 19 (2.9)              | 76 (3.5)           |
| 15-16                                          | 415 (13.1)           | 80 (12.2)             | 333 (15.2)         |
| 17-18                                          | 947 (29.8)           | 207 (31.5)            | 709 (32.4)         |
| 19-20                                          | 689 (21.7)           | 157 (23.9)            | 435 (19.9)         |
| 21-25                                          | 772 (24.3)           | 158 (24.0)            | 491 (22.4)         |
| >25                                            | 259 (8.2)            | 36 (5.5)              | 147 (6.7)          |
| Missing data                                   | 38 (-)               | 8 (-)                 | 23 (-)             |
| <b>Lifetime number of sexual partners</b>      | $P(GCgp-TF)<0.001^5$ | $P(GCgp-GCv)=0.2^6$   | $P(GC-TF)<0.001^7$ |
| 1                                              | 1922 (60.7)          | 377 (57.2)            | 933 (43.0)         |
| 2-3                                            | 755 (23.8)           | 154 (23.4)            | 662 (30.5)         |
| 4-5                                            | 250 (7.9)            | 68 (10.3)             | 296 (13.6)         |
| 6-10                                           | 172 (5.4)            | 42 (6.4)              | 191 (8.8)          |
| 11-20                                          | 49 (1.5)             | 13 (2.0)              | 64 (2.9)           |
| >20                                            | 19 (0.6)             | 5 (0.8)               | 25 (1.2)           |
| Missing data                                   | 45 (-)               | 6 (-)                 | 43 (-)             |
| <b>Contraceptive methods used<sup>4</sup></b>  | $P(GCgp-TF)=0.2^5$   | $P(GCgp-GCv)=0.9^6$   | $P(GC-TF)=0.1^7$   |
| Oral contraceptives                            | 2477 (77.1)          | 515 (77.4)            | 1672 (75.5)        |
| IUD                                            | $P(GCgp-TF)=0.2^5$   | $P(GCgp-GCv)=0.008^6$ | $P(GC-TF)=0.04^7$  |
|                                                | 597 (18.6)           | 154 (23.2)            | 382 (17.3)         |
| Condom                                         | $P(GCgp-TF)<0.004^5$ | $P(GCgp-GCv)=0.2^6$   | $P(GC-TF)<0.001^7$ |
|                                                | 2311 (71.9)          | 495 (74.4)            | 1716 (77.5)        |
| Rhythm method/coitus interruptus               | $P(GCgp-TF)=0.04^5$  | $P(GCgp-GCv)=0.05^6$  | $P(GC-TF)=0.1^7$   |
|                                                | 1559 (48.5)          | 351 (52.8)            | 1139 (51.4)        |
| Diaphragm/spermicide                           | $P(GCgp-TF)=0.1^5$   | $P(GCgp-GCv)=0.4^6$   | $P(GC-TF)=0.2^7$   |
|                                                | 136 (4.2)            | 23 (3.5)              | 75 (3.4)           |
| Injection/implant                              | $P(GCgp-TF)<0.001^5$ | $P(GCgp-GCv)=0.2^6$   | $P(GC-TF)<0.001^7$ |
|                                                | 160 (5.0)            | 26 (3.9)              | 67 (3.0)           |
| Tube ligation                                  | $P(GCgp-TF)=0.3^5$   | $P(GCgp-GCv)=0.4^6$   | $P(GC-TF)=0.2^7$   |
|                                                | 430 (13.4)           | 97 (14.6)             | 275 (12.4)         |
| Vasectomy                                      | $P(GCgp-TF)<0.001^5$ | $P(GCgp-GCv)=0.06^6$  | $P(GC-TF)<0.001^7$ |
|                                                | 332 (10.3)           | 85 (12.8)             | 132 (6.0)          |

GCgp: Gran Canaria (general population); GCv: Gran Canaria (volunteers); GC: Gran Canaria (including general population and volunteers); TF: Tenerife.

<sup>1</sup> Among ever pregnant women. <sup>2</sup> Includes syphilis, genital herpes, gonorrhoea, HIV (positive test), genital warts, Chlamydia, genital ulcer, others. <sup>3</sup> Among women with a previous pap smear. <sup>4</sup> Do not add the total of women

because a woman can use more than one contraceptive in lifetime. <sup>5</sup> P-value of Pearson's Chi-squared test between Gran Canaria (general population) and Tenerife. <sup>6</sup> P-value of Pearson's Chi-squared test between Gran Canaria (general population) and Gran Canaria (volunteers). <sup>7</sup> P-value of Pearson's Chi-squared test between Gran Canaria (general population and volunteers) and Tenerife.

**Supplementary Table 2 – Prevalence of Human Papillomavirus (HPV) by age group for any type and for any high-risk type and by population.**

**GRAN CANARIA – GENERAL POPULATION (n=3,185)**

| Age group (years) | Number of tested women | Number of HPV positive women | Any HPV prevalence (%; 95% CI) | Any HR HPV prevalence <sup>1</sup> (%; 95% CI) |
|-------------------|------------------------|------------------------------|--------------------------------|------------------------------------------------|
| 18-24             | 274                    | 64                           | 23.4 (18.3-28.4)               | 21.9 (17.0-26.8)                               |
| 25-29             | 372                    | 81                           | 21.8 (17.6-26.0)               | 19.1 (15.1-23.1)                               |
| 30-34             | 478                    | 74                           | 15.5 (12.2-18.7)               | 12.3 (9.4-15.3)                                |
| 35-39             | 455                    | 42                           | 9.2 (6.6-11.9)                 | 6.6 (4.3-8.9)                                  |
| 40-44             | 432                    | 45                           | 10.4 (7.5-13.3)                | 9.3 (6.5-12.0)                                 |
| 45-49             | 339                    | 37                           | 10.9 (7.6-14.2)                | 8.3 (5.3-11.2)                                 |
| 50-54             | 304                    | 20                           | 6.6 (3.8-9.4)                  | 4.9 (2.5-7.4)                                  |
| 55-59             | 252                    | 14                           | 5.6 (2.7-8.4)                  | 4.0 (1.6-6.4)                                  |
| 60-65             | 279                    | 28                           | 10.0 (6.5-13.6)                | 5.7 (3.0-8.5)                                  |
| <b>Total</b>      | <b>3,185</b>           | <b>405</b>                   | <b>12.7 (11.6-13.9)</b>        | <b>10.3 (9.3-11.4)</b>                         |

HPV: Human Papillomavirus; CI: Confidence Interval; HR: High-Risk.

<sup>1</sup> HR types includes high-risk types and possibly /probably high-risk types: 16, 18, 31, 33, 35, 39, 45, 51, 52, 56, 58, 59, 53, 66, 67, 68, 69, 69/71, 70, 73.

**GRAN CANARIA – VOLUNTEERS (n=662)**

| Age group (years) | Number of tested women | Number of HPV positive women | Any HPV prevalence (%; 95% CI) | Any HR HPV prevalence <sup>1</sup> (%; 95% CI) |
|-------------------|------------------------|------------------------------|--------------------------------|------------------------------------------------|
| 18-24             | 65                     | 17                           | 26.2 (15.5-36.8)               | 23.1 (12.8-33.3)                               |
| 25-29             | 59                     | 12                           | 20.3 (10.1-30.6)               | 16.9 (7.4-26.5)                                |
| 30-34             | 94                     | 19                           | 20.2 (12.1-28.3)               | 19.1 (11.2-27.1)                               |
| 35-39             | 109                    | 17                           | 15.6 (8.8-22.4)                | 12.8 (6.6-19.1)                                |
| 40-44             | 88                     | 11                           | 12.5 (5.6-19.4)                | 9.1 (3.1-15.1)                                 |
| 45-49             | 85                     | 8                            | 9.4 (3.2-15.6)                 | 4.7 (0.2-9.2)                                  |
| 50-54             | 65                     | 3                            | 4.6 (0.0-9.7)                  | 4.6 (0.0-9.7)                                  |
| 55-59             | 65                     | 7                            | 10.8 (3.2-18.3)                | 6.2 (0.3-12.0)                                 |
| 60-65             | 32                     | 2                            | 6.2 (0.0-14.6)                 | 6.2 (0.0-14.6)                                 |
| <b>Total</b>      | <b>662</b>             | <b>96</b>                    | <b>14.5 (11.8-17.2)</b>        | <b>11.8 (9.3-14.2)</b>                         |

HPV: Human Papillomavirus; CI: Confidence Interval; HR: High-Risk.

<sup>1</sup> HR types includes high-risk types and possibly /probably high-risk types: 16, 18, 31, 33, 35, 39, 45, 51, 52, 56, 58, 59, 53, 66, 67, 68, 69, 69/71, 70, 73.

**GRAN CANARIA (n=3,847)**

| Age group (years) | Number of tested women | Number of HPV positive women | Any HPV prevalence (%; 95% CI) | Any HR HPV prevalence <sup>1</sup> (%; 95% CI) |
|-------------------|------------------------|------------------------------|--------------------------------|------------------------------------------------|
| 18-24             | 339                    | 81                           | 23.9 (19.4-28.4)               | 22.1 (17.7-26.5)                               |
| 25-29             | 431                    | 93                           | 21.6 (17.7-25.5)               | 18.8 (15.1-22.5)                               |
| 30-34             | 572                    | 93                           | 16.3 (13.2-19.3)               | 13.5 (10.7-16.3)                               |
| 35-39             | 564                    | 59                           | 10.5 (7.9-13.0)                | 7.8 (5.6-10.0)                                 |
| 40-44             | 520                    | 56                           | 10.8 (8.1-13.4)                | 9.2 (6.7-11.7)                                 |
| 45-49             | 424                    | 45                           | 10.6 (7.7-13.5)                | 7.5 (5.0-10.1)                                 |
| 50-54             | 369                    | 23                           | 6.2 (3.8-8.7)                  | 4.9 (2.7-7.1)                                  |
| 55-59             | 317                    | 21                           | 6.6 (3.9-9.4)                  | 4.4 (2.2-6.7)                                  |
| 60-65             | 311                    | 30                           | 9.6 (6.4-12.9)                 | 5.8 (3.2-8.4)                                  |
| <b>Total</b>      | <b>3,847</b>           | <b>501</b>                   | <b>13.0 (12.0-14.1)</b>        | <b>10.6 (9.6-11.6)</b>                         |

HPV: Human Papillomavirus; CI: Confidence Interval; HR: High-Risk.

<sup>1</sup> HR types includes high-risk types and possibly /probably high-risk types: 16, 18, 31, 33, 35, 39, 45, 51, 52, 56, 58, 59, 53, 66, 67, 68, 69, 69/71, 70, 73.

**TENERIFE (n=2,163)**

| Age group (years) | Number of tested women | Number of HPV positive women | Any HPV prevalence (%; 95% CI) | Any HR HPV prevalence <sup>1</sup> (%; 95% CI) |
|-------------------|------------------------|------------------------------|--------------------------------|------------------------------------------------|
| 18-24             | 226                    | 70                           | 31.0 (24.9-37.0)               | 26.5 (20.8-32.3)                               |
| 25-29             | 224                    | 52                           | 23.2 (17.7-28.7)               | 21.4 (16.1-26.8)                               |
| 30-34             | 322                    | 68                           | 21.1 (16.7-25.6)               | 18.3 (14.1-22.5)                               |
| 35-39             | 326                    | 37                           | 11.3 (7.9-14.8)                | 8.3 (5.3-11.3)                                 |
| 40-44             | 263                    | 23                           | 8.7 (5.3-12.2)                 | 7.2 (4.1-10.4)                                 |
| 45-49             | 198                    | 14                           | 7.1 (3.5-10.6)                 | 6.1 (2.7-9.4)                                  |
| 50-54             | 238                    | 20                           | 8.4 (4.9-11.9)                 | 5.0 (2.3-7.8)                                  |
| 55-59             | 178                    | 21                           | 11.8 (7.1-16.5)                | 7.3 (3.5-11.1)                                 |
| 60-65             | 188                    | 14                           | 7.4 (3.7-11.2)                 | 5.9 (2.5-9.2)                                  |
| <b>Total</b>      | <b>2,163</b>           | <b>319</b>                   | <b>14.7 (13.3-16.2)</b>        | <b>12.1 (10.7-13.4)</b>                        |

HPV: Human Papillomavirus; CI: Confidence Interval; HR: High-Risk.

<sup>1</sup> HR types includes high-risk types and possibly /probably high-risk types: 16, 18, 31, 33, 35, 39, 45, 51, 52, 56, 58, 59, 53, 66, 67, 68, 69, 69/71, 70, 73.

**Supplementary Table 3 – Overall prevalence and age-specific prevalence of cervical HPV infections by any HPV type, any hr HPV type, HPV types 6/11/16/18/31/33/45/52/58 and HPV types 16/18 (n=6,010 women).**

| Age group (years) | Any HPV prevalence (%; 95% CI) | Any HR HPV prevalence <sup>1</sup> (%; 95% CI) | Prevalence of HPV 6/11/16/18/31/33/45/52/58 (%; 95% CI) | Prevalence of HPV 16/18 (%; 95% CI) |
|-------------------|--------------------------------|------------------------------------------------|---------------------------------------------------------|-------------------------------------|
| 18-24             | 26.7 (23.1-30.4)               | 23.9 (20.4-27.4)                               | 17.3 (14.2-20.5)                                        | 10.8 (8.2-13.4)                     |
| 25-29             | 22.1 (19.0-25.3)               | 19.7 (16.6-22.7)                               | 13.9 (11.2-16.5)                                        | 8.7 (6.5-10.9)                      |
| 30-34             | 18.0 (15.5-20.5)               | 15.2 (12.9-17.6)                               | 10.4 (8.4-12.4)                                         | 5.0 (3.6-6.5)                       |
| 35-39             | 10.8 (8.7-12.8)                | 8.0 (6.2-9.8)                                  | 5.8 (4.3-7.4)                                           | 3.6 (2.4-4.8)                       |
| 40-44             | 10.1 (8.0-12.2)                | 8.6 (6.6-10.5)                                 | 5.4 (3.8-6.9)                                           | 3.3 (2.1-4.6)                       |
| 45-49             | 9.5 (7.2-11.8)                 | 7.1 (5.1-9.1)                                  | 3.5 (2.1-5.0)                                           | 2.6 (1.3-3.8)                       |
| 50-54             | 7.1 (5.0-9.1)                  | 4.9 (3.2-6.7)                                  | 2.3 (1.1-3.5)                                           | 1.0 (0.2-1.8)                       |
| 55-59             | 8.5 (6.0-10.9)                 | 5.5 (3.5-7.5)                                  | 3.2 (1.7-4.8)                                           | 1.2 (0.2-2.2)                       |
| 60-65             | 8.8 (6.3-11.3)                 | 5.8 (3.8-7.9)                                  | 3.2 (1.7-4.8)                                           | 2.4 (1.1-3.7)                       |
| <b>Total</b>      | <b>13.6 (12.8-14.5)</b>        | <b>11.1 (10.3-11.9)</b>                        | <b>7.4 (6.7-8.0)</b>                                    | <b>4.3 (3.8-4.9)</b>                |

HPV: Human Papillomavirus; HR: High-Risk; CI: Confidence Interval.

<sup>1</sup> HR HPV types includes high-risk types and possibly /probably high-risk types: 16, 18, 31, 33, 35, 39, 45, 51, 52, 56, 58, 59, 53, 66, 67, 68, 69, 69/71, 70, 73.

Supplementary Table 4 – Human Papillomavirus (HPV) type-specific distribution of the most common types (n=6,010 women) by cytology result.

| HPV type                         | NORMAL CYTOLOGY (n=5,693)    |                                            |                                                 | ABNORMAL CYTOLOGY (n=317)    |                                            |                                                 |
|----------------------------------|------------------------------|--------------------------------------------|-------------------------------------------------|------------------------------|--------------------------------------------|-------------------------------------------------|
|                                  | Number of HPV positive women | HPV prevalence among all women (%; 95% CI) | HPV prevalence among positive women (%; 95% CI) | Number of HPV positive women | HPV prevalence among all women (%; 95% CI) | HPV prevalence among positive women (%; 95% CI) |
| <b>Any HPV types</b>             | <b>601</b>                   | <b>10.6 (9.8-11.4)</b>                     | <b>-</b>                                        | <b>219</b>                   | <b>69.1 (64.0-74.2)</b>                    | <b>-</b>                                        |
| <b>Single types</b>              | <b>260</b>                   | <b>4.6 (4.0-5.1)</b>                       | <b>43.3 (39.3-47.2)</b>                         | <b>99</b>                    | <b>31.2 (26.1-36.3)</b>                    | <b>45.2 (38.6-51.8)</b>                         |
| <i>HR HPV types</i> <sup>1</sup> |                              |                                            |                                                 |                              |                                            |                                                 |
| 16                               | 56                           | 1.0 (0.7-1.2)                              | 9.3 (7.0-11.6)                                  | 19                           | 6.0 (3.4-8.6)                              | 8.7 (4.9-12.4)                                  |
| 51                               | 22                           | 0.4 (0.2-0.5)                              | 3.7 (2.2-5.2)                                   | 12                           | 3.8 (1.7-5.9)                              | 5.5 (2.5-8.5)                                   |
| 53                               | 21                           | 0.4 (0.2-0.5)                              | 3.5 (2.0-5.0)                                   | 7                            | 2.2 (0.6-3.8)                              | 3.2 (0.9-5.5)                                   |
| 31                               | 14                           | 0.2 (0.1-0.4)                              | 2.3 (1.1-3.5)                                   | 2                            | 0.6 (0.2-1.5)                              | 0.9 (0.3-2.2)                                   |
| 59                               | 8                            | 0.1 (0.0-0.2)                              | 1.3 (0.4-2.2)                                   | 6                            | 1.9 (0.4-3.4)                              | 2.7 (0.6-4.9)                                   |
| 33                               | 10                           | 0.2 (0.1-0.3)                              | 1.3 (0.4-2.2)                                   | 1                            | 0.3 (0.3-0.9)                              | 0.5 (0.4-1.3)                                   |
| 68                               | 4                            | 0.1 (0.0-0.1)                              | 0.7 (0.0-1.3)                                   | 7                            | 2.2 (0.6-3.8)                              | 3.2 (0.9-5.5)                                   |
| 70                               | 7                            | 0.1 (0.0-0.2)                              | 1.2 (0.3-2.0)                                   | 4                            | 1.3 (0.0-2.5)                              | 1.8 (0.1-3.6)                                   |
| 66                               | 10                           | 0.2 (0.1-0.3)                              | 1.7 (0.6-2.7)                                   | -                            | -                                          | -                                               |
| 52                               | 6                            | 0.1 (0.0-0.2)                              | 1.0 (0.2-1.8)                                   | 3                            | 0.9 (0.1-2.0)                              | 1.4 (0.2-2.9)                                   |
| 58                               | 4                            | 0.1 (0.0-0.1)                              | 0.7 (0.0-1.3)                                   | 5                            | 1.6 (0.2-2.9)                              | 2.3 (0.3-4.3)                                   |
| 18                               | 7                            | 0.1 (0.0-0.2)                              | 1.2 (0.3-2.0)                                   | 1                            | 0.3 (0.3-0.9)                              | 0.5 (0.4-1.3)                                   |
| 56                               | 3                            | 0.1 (0.0-0.1)                              | 0.5 (0.0-1.1)                                   | 4                            | 1.3 (0.0-2.5)                              | 1.8 (0.1-3.6)                                   |
| 35                               | 3                            | 0.1 (0.0-0.1)                              | 0.5 (0.0-1.1)                                   | 2                            | 0.6 (0.2-1.5)                              | 0.9 (0.3-2.2)                                   |
| 39                               | 3                            | 0.1 (0.0-0.1)                              | 0.5 (0.0-1.1)                                   | 2                            | 0.6 (0.2-1.5)                              | 0.9 (0.3-2.2)                                   |
| 73                               | 3                            | 0.1 (0.0-0.1)                              | 0.5 (0.0-1.1)                                   | 1                            | 0.3 (0.3-0.9)                              | 0.5 (0.4-1.3)                                   |
| 45                               | 2                            | 0.0 (0.0-0.1)                              | 0.3 (0.0-0.8)                                   | 1                            | 0.3 (0.3-0.9)                              | 0.5 (0.4-1.3)                                   |

|                                   |                 |            |                      |                         |            |                         |                         |
|-----------------------------------|-----------------|------------|----------------------|-------------------------|------------|-------------------------|-------------------------|
|                                   | 67              | 2          | 0.0 (0.0-0.1)        | 0.3 (0.0-0.8)           | -          | -                       | -                       |
|                                   | 69              | 1          | 0.0 (0.0-0.1)        | 0.2 (0.0-0.5)           | -          | -                       | -                       |
|                                   | 69/71           | 1          | 0.0 (0.0-0.1)        | 0.2 (0.0-0.5)           | -          | -                       | -                       |
| <b>LR HPV types<sup>2</sup></b>   |                 |            |                      |                         |            |                         |                         |
|                                   | 42              | 11         | 0.2 (0.1-0.3)        | 1.8 (0.8-2.9)           | 6          | 1.9 (0.4-3.4)           | 2.7 (0.6-4.9)           |
|                                   | 84              | 10         | 0.2 (0.1-0.3)        | 1.7 (0.6-2.7)           | 2          | 0.6 (0.2-1.5)           | 0.9 (0.3-2.2)           |
|                                   | 62              | 9          | 0.2 (0.1-0.3)        | 1.5 (0.5-2.5)           | 2          | 0.6 (0.2-1.5)           | 0.9 (0.3-2.2)           |
|                                   | 61              | 8          | 0.1 (0.0-0.2)        | 1.3 (0.4-2.2)           | 2          | 0.6 (0.2-1.5)           | 0.9 (0.3-2.2)           |
|                                   | 6               | 8          | 0.1 (0.0-0.2)        | 1.3 (0.4-2.2)           | 1          | 0.3 (0.3-0.9)           | 0.5 (0.4-1.3)           |
|                                   | 55              | 2          | 0.0 (0.0-0.1)        | 0.3 (0.0-0.8)           | 7          | 2.2 (0.6-3.8)           | 3.2 (0.9-5.5)           |
|                                   | 81              | 7          | 0.1 (0.0-0.2)        | 1.2 (0.3-2.0)           | 2          | 0.6 (0.2-1.5)           | 0.9 (0.3-2.2)           |
|                                   | 89              | 5          | 0.1 (0.0-0.2)        | 0.8 (0.1-1.6)           | -          | -                       | -                       |
|                                   | 54              | 4          | 0.1 (0.0-0.1)        | 0.7 (0.0-1.3)           | -          | -                       | -                       |
|                                   | 11              | 2          | 0.0 (0.0-0.1)        | 0.3 (0.0-0.8)           | -          | -                       | -                       |
|                                   | 43              | 2          | 0.0 (0.0-0.1)        | 0.3 (0.0-0.8)           | -          | -                       | -                       |
|                                   | 72              | 2          | 0.0 (0.0-0.1)        | 0.3 (0.0-0.8)           | -          | -                       | -                       |
|                                   | 83              | 2          | 0.0 (0.0-0.1)        | 0.3 (0.0-0.8)           | -          | -                       | -                       |
|                                   | 40              | 1          | 0.0 (0.0-0.1)        | 0.2 (0.0-0.5)           | 1          | 0.3 (0.3-0.9)           | 0.5 (0.4-1.3)           |
| <b>X</b>                          |                 | <b>24</b>  | <b>0.4 (0.3-0.6)</b> | <b>4.0 (2.4-5.6)</b>    | <b>4</b>   | <b>1.3 (0.0-2.5)</b>    | <b>1.8 (0.1-3.6)</b>    |
| <b>Multiple types</b>             |                 | <b>317</b> | <b>5.6 (5.0-6.2)</b> | <b>52.7 (48.8-56.7)</b> | <b>116</b> | <b>36.6 (31.3-41.9)</b> | <b>53.0 (46.4-59.6)</b> |
| <b>Number of multiple types</b>   |                 |            |                      |                         |            |                         |                         |
|                                   | 2 types         | 153        | 2.7 (2.3-3.1)        | 25.5 (22.0-28.9)        | 50         | 15.8 (11.8-19.8)        | 22.8 (17.3-28.4)        |
|                                   | 3 types         | 81         | 1.4 (1.1-1.7)        | 13.5 (10.7-16.2)        | 34         | 10.7 (7.3-14.1)         | 15.5 (10.7-20.3)        |
|                                   | 4 types         | 57         | 1.0 (0.7-1.3)        | 9.5 (7.1-11.8)          | 16         | 5.0 (2.6-7.5)           | 7.3 (3.9-10.8)          |
|                                   | 5 or more types | 26         | 0.5 (0.3-0.6)        | 4.3 (2.7-6.0)           | 16         | 5.0 (2.6-7.5)           | 7.3 (3.9-10.8)          |
| <b>Most frequent combinations</b> |                 |            |                      |                         |            |                         |                         |
|                                   | 16 with others  | 113        | 2.0 (1.6-2.3)        | 18.8 (15.7-21.9)        | 40         | 12.6 (9.0-16.3)         | 18.3 (13.1-23.4)        |



|                |    |               |                |    |                |                 |
|----------------|----|---------------|----------------|----|----------------|-----------------|
| 51 with others | 56 | 1.0 (0.7-1.2) | 9.3 (7.0-11.6) | 22 | 6.9 (4.1-9.7)  | 10.0 (6.1-14.0) |
| 53 with others | 50 | 0.9 (0.6-1.1) | 8.3 (6.1-10.5) | 31 | 9.8 (6.5-13.0) | 14.2 (9.5-18.8) |
| 31 with others | 38 | 0.7 (0.5-0.9) | 6.3 (4.4-8.3)  | 16 | 5.0 (2.6-7.5)  | 7.3 (3.9-10.8)  |
| 42 with others | 42 | 0.7 (0.5-1.0) | 7.0 (5.0-9.0)  | 17 | 5.4 (2.9-7.8)  | 7.8 (4.2-11.3)  |
| 6 with others  | 16 | 0.3 (0.1-0.4) | 2.7 (1.4-3.9)  | 9  | 2.8 (1.0-4.7)  | 4.1 (1.5-6.7)   |
| 18 with others | 36 | 0.6 (0.4-0.8) | 6.0 (4.1-7.9)  | 6  | 1.9 (0.4-3.4)  | 2.7 (0.6-4.9)   |
| 33 with others | 17 | 0.3 (0.2-0.4) | 2.8 (1.5-4.2)  | 3  | 0.9 (0.0-2.0)  | 1.4 (0.0-2.9)   |
| 59 with others | 50 | 0.9 (0.6-1.1) | 8.3 (6.1-10.5) | 17 | 5.4 (2.9-7.8)  | 7.8 (4.2-11.3)  |
| 39 with others | 27 | 0.5 (0.3-0.7) | 4.5 (2.8-6.1)  | 10 | 3.2 (1.2-5.1)  | 4.6 (1.8-7.3)   |
| 35 with others | 13 | 0.2 (0.1-0.4) | 2.2 (1.0-3.3)  | 6  | 1.9 (0.4-3.4)  | 2.7 (0.6-4.9)   |
| 52 with others | 40 | 0.7 (0.5-0.9) | 6.7 (4.7-8.6)  | 14 | 4.4 (2.2-6.7)  | 6.4 (3.2-9.6)   |
| 56 with others | 29 | 0.5 (0.3-0.7) | 4.8 (3.1-6.5)  | 14 | 4.4 (2.2-6.7)  | 6.4 (3.2-9.6)   |
| 58 with others | 32 | 0.6 (0.4-0.8) | 5.3 (3.5-7.1)  | 10 | 3.2 (1.2-5.1)  | 4.6 (1.8-7.3)   |
| 62 with others | 37 | 0.6 (0.4-0.9) | 6.2 (4.2-8.1)  | 9  | 2.8 (1.0-4.7)  | 4.1 (1.5-6.7)   |
| 61 with others | 29 | 0.5 (0.3-0.7) | 4.8 (3.1-6.5)  | 15 | 4.7 (2.4-7.1)  | 6.8 (3.5-10.2)  |
| 66 with others | 38 | 0.7 (0.5-0.9) | 6.3 (4.4-8.3)  | 12 | 3.8 (1.7-5.9)  | 5.5 (2.5-8.5)   |
| 45 with others | 24 | 0.4 (0.3-0.6) | 4.0 (2.4-5.6)  | 10 | 3.2 (1.2-5.1)  | 4.6 (1.8-7.3)   |
| 68 with others | 22 | 0.4 (0.2-0.5) | 3.7 (2.2-5.2)  | 10 | 3.2 (1.2-5.1)  | 4.6 (1.8-7.3)   |
| 54 with others | 34 | 0.6 (0.4-0.8) | 5.7 (3.8-7.5)  | 14 | 4.4 (2.2-6.7)  | 6.4 (3.2-9.6)   |
| 70 with others | 11 | 0.2 (0.1-0.3) | 1.8 (0.8-2.9)  | 4  | 1.3 (0.0-2.5)  | 1.8 (0.1-6.3)   |
| 84 with others | 30 | 0.5 (0.3-0.7) | 5.0 (3.3-6.7)  | 8  | 2.5 (0.8-4.3)  | 3.7 (1.2-6.1)   |
| 55 with others | 11 | 0.2 (0.1-0.3) | 1.8 (0.8-2.9)  | 7  | 2.2 (0.6-3.8)  | 3.2 (0.9-5.5)   |
| 11 with others | 6  | 0.1 (0.0-0.2) | 1.0 (0.2-1.8)  | 2  | 0.6 (0.0-1.5)  | 0.9 (0.3-2.2)   |
| 81 with others | 19 | 0.3 (0.2-0.5) | 3.2 (1.8-4.6)  | 9  | 2.8 (1.0-4.7)  | 4.1 (1.5-6.7)   |
| 40 with others | 10 | 0.2 (0.1-0.3) | 1.7 (0.6-2.7)  | -  | -              | -               |
| 89 with others | 32 | 0.6 (0.4-0.8) | 5.3 (3.5-7.1)  | 14 | 4.4 (2.2-6.7)  | 6.4 (3.2-9.6)   |
| 67 with others | 9  | 0.2 (0.1-0.3) | 1.5 (0.5-2.5)  | 4  | 1.3 (0.0-2.5)  | 1.8 (0.1-3.6)   |

|                                        |     |               |                  |     |                  |                  |
|----------------------------------------|-----|---------------|------------------|-----|------------------|------------------|
| 69 with others                         | 5   | 0.1 (0.0-0.2) | 0.8 (0.1-1.6)    | -   | -                | -                |
| 73 with others                         | 16  | 0.3 (0.1-0.4) | 2.7 (1.4-3.9)    | 7   | 2.2 (0.6-3.8)    | 3.2 (0.9-5.5)    |
| 83 with others                         | 9   | 0.2 (0.1-0.3) | 1.5 (0.5-2.5)    | 6   | 1.9 (0.4-3.4)    | 2.7 (0.6-4.9)    |
| 43 with others                         | 0   | 0.0 (0.0-0.0) | 0.0 (0.0-0.0)    | -   | -                | -                |
| 72 with others                         | 4   | 0.1 (0.0-0.1) | 0.7 (0.0-1.3)    | 4   | 1.3 (0.0-2.5)    | 1.8 (0.1-3.6)    |
| 69/71 with others                      | 2   | 0.0 (0.0-0.1) | 0.3 (0.0-0.8)    | -   | -                | -                |
| 71 with others                         | 6   | 0.1 (0.0-0.2) | 1.0 (0.2-1.8)    | 3   | 0.9 (0.0-2.0)    | 1.4 (0.0-2.9)    |
| 74 with others                         | 5   | 0.1 (0.0-0.2) | 0.8 (0.1-1.6)    | 1   | 0.3 (0.0-0.9)    | 0.5 (0.0-1.3)    |
| 64 with others                         | 1   | 0.0 (0.0-0.1) | 0.2 (0.0-0.5)    | 1   | 0.3 (0.0-0.9)    | 0.5 (0.0-1.3)    |
| 82 with others                         | 10  | 0.2 (0.1-0.3) | 1.7 (0.6-2.7)    | 3   | 0.9 (0.0-2.0)    | 1.4 (0.0-2.9)    |
| <b>Combinations of vaccine types</b>   |     |               |                  |     |                  |                  |
| 6/11 <sup>3</sup>                      | 31  | 0.5 (0.4-0.7) | 5.2 (3.4-6.9)    | 12  | 3.8 (1.7-5.9)    | 5.5 (2.5-8.5)    |
| 16/18 <sup>3</sup>                     | 199 | 3.5 (3.0-4.0) | 33.1 (29.3-36.9) | 62  | 19.6 (15.2-23.9) | 28.3 (22.3-34.3) |
| 6/11/16/18 <sup>3</sup>                | 225 | 4.0 (3.4-4.5) | 37.4 (33.6-41.3) | 72  | 22.7 (18.1-27.3) | 32.9 (26.7-39.1) |
| 6/11/16/18/31/33/45/52/58 <sup>3</sup> | 334 | 5.9 (5.3-6.5) | 55.6 (51.6-59.5) | 110 | 34.7 (29.5-39.9) | 50.2 (43.6-56.9) |

HPV: Human Papillomavirus; HR: High-Risk; LR: Low-Risk; CI: Confidence Interval.

<sup>1</sup> HR types includes high-risk types and possibly /probably high-risk types: 16, 18, 31, 33, 35, 39, 45, 51, 52, 56, 58, 59, 53, 66, 67, 68, 69, 69/71, 70, 73. <sup>2</sup> LR types includes: 6, 11, 40, 42, 43, 54, 55, 61, 62, 72, 81, 83, 84, 89. <sup>3</sup> One or more of the vaccine types are concerned.

Supplementary Table 5 – Human Papillomavirus (HPV) type-specific distribution of the most common types (n=6,010 women) by result of abnormal cytology.

| HPV type                         | ASCUS (n=214)                |                                            |                                                 | LSIL (n=91)                  |                                            |                                                 | HSIL+ (n=12)                 |                                            |                                                 |
|----------------------------------|------------------------------|--------------------------------------------|-------------------------------------------------|------------------------------|--------------------------------------------|-------------------------------------------------|------------------------------|--------------------------------------------|-------------------------------------------------|
|                                  | Number of HPV positive women | HPV prevalence among all women (%; 95% CI) | HPV prevalence among positive women (%; 95% CI) | Number of HPV positive women | HPV prevalence among all women (%; 95% CI) | HPV prevalence among positive women (%; 95% CI) | Number of HPV positive women | HPV prevalence among all women (%; 95% CI) | HPV prevalence among positive women (%; 95% CI) |
| <b>Any HPV type</b>              | <b>130</b>                   | <b>60.7 (54.2-67.3)</b>                    | <b>-</b>                                        | <b>79</b>                    | <b>86.8 (79.9-93.8)</b>                    | <b>-</b>                                        | <b>10</b>                    | <b>83.3 (62.2-100.0)</b>                   | <b>-</b>                                        |
| <b>Single types</b>              | <b>66</b>                    | <b>30.8 (24.7-37.0)</b>                    | <b>50.8 (42.2-59.4)</b>                         | <b>29</b>                    | <b>31.9 (22.3-41.4)</b>                    | <b>36.7 (26.1-47.3)</b>                         | <b>4</b>                     | <b>33.3 (6.7-60.0)</b>                     | <b>40.0 (9.6-70.4)</b>                          |
| <i>HR HPV types</i> <sup>1</sup> |                              |                                            |                                                 |                              |                                            |                                                 |                              |                                            |                                                 |
| 16                               | 13                           | 6.1 (2.9-9.3)                              | 10.0 (4.8-15.2)                                 | 4                            | 4.4 (0.2-8.6)                              | 5.1 (0.2-9.9)                                   | 2                            | 16.7 (0.0-37.8)                            | 20.0 (0.0-44.8)                                 |
| 51                               | 6                            | 2.8 (0.6-5.0)                              | 4.6 (1.0-8.2)                                   | 5                            | 5.5 (0.8-10.2)                             | 6.3 (1.0-11.7)                                  | 1                            | 8.3 (0.0-24.0)                             | 10.0 (0.0-28.6)                                 |
| 53                               | 5                            | 2.3 (0.3-4.4)                              | 3.8 (0.5-7.2)                                   | 2                            | 2.2 (0.0-5.2)                              | 2.5 (0.0-6.0)                                   | -                            | -                                          | -                                               |
| 31                               | 2                            | 0.9 (0.0-2.2)                              | 1.5 (0.0-3.7)                                   | -                            | -                                          | -                                               | -                            | -                                          | -                                               |
| 59                               | 5                            | 2.3 (0.3-4.4)                              | 3.8 (0.5-7.2)                                   | 1                            | 1.1 (0.0-3.2)                              | 1.3 (0.0-3.7)                                   | -                            | -                                          | -                                               |
| 33                               | 1                            | 0.5 (0.0-1.4)                              | 0.8 (0.0-2.3)                                   | -                            | -                                          | -                                               | -                            | -                                          | -                                               |
| 68                               | 5                            | 2.3 (0.3-4.4)                              | 3.8 (0.5-7.2)                                   | 2                            | 2.2 (0.0-5.2)                              | 2.5 (0.0-6.0)                                   | -                            | -                                          | -                                               |
| 70                               | 2                            | 0.9 (0.0-2.2)                              | 1.5 (0.0-3.7)                                   | 2                            | 2.2 (0.0-5.2)                              | 2.5 (0.0-6.0)                                   | -                            | -                                          | -                                               |
| 66                               | -                            | -                                          | -                                               | -                            | -                                          | -                                               | -                            | -                                          | -                                               |
| 52                               | 2                            | 0.9 (0.0-2.2)                              | 1.5 (0.0-3.7)                                   | 1                            | 1.1 (0.0-3.2)                              | 1.3 (0.0-3.7)                                   | -                            | -                                          | -                                               |
| 58                               | 3                            | 1.4 (0.0-3.0)                              | 2.3 (0.0-4.9)                                   | 2                            | 2.2 (0.0-5.2)                              | 2.5 (0.0-6.0)                                   | -                            | -                                          | -                                               |
| 18                               | 1                            | 0.5 (0.0-1.4)                              | 0.8 (0.0-2.3)                                   | -                            | -                                          | -                                               | -                            | -                                          | -                                               |
| 56                               | 2                            | 0.9 (0.0-2.2)                              | 1.5 (0.0-3.7)                                   | 2                            | 2.2 (0.0-5.2)                              | 2.5 (0.0-6.0)                                   | -                            | -                                          | -                                               |
| 35                               | 2                            | 0.9 (0.0-2.2)                              | 1.5 (0.0-3.7)                                   | -                            | -                                          | -                                               | -                            | -                                          | -                                               |
| 39                               | 1                            | 0.5 (0.0-1.4)                              | 0.8 (0.0-2.3)                                   | 1                            | 1.1 (0.0-3.2)                              | 1.3 (0.0-3.7)                                   | -                            | -                                          | -                                               |
| 73                               | -                            | -                                          | -                                               | -                            | -                                          | -                                               | 1                            | 8.3 (0.0-24.0)                             | 10.0 (0.0-28.6)                                 |

|  |                                 |           |                         |                         |           |                         |                         |          |                         |                         |
|--|---------------------------------|-----------|-------------------------|-------------------------|-----------|-------------------------|-------------------------|----------|-------------------------|-------------------------|
|  | 45                              | 1         | 0.5 (0.0-1.4)           | 0.8 (0.0-2.3)           | -         | -                       | -                       | -        | -                       | -                       |
|  | 67                              | -         | -                       | -                       | -         | -                       | -                       | -        | -                       | -                       |
|  | 69                              | -         | -                       | -                       | -         | -                       | -                       | -        | -                       | -                       |
|  | 69/71                           | -         | -                       | -                       | -         | -                       | -                       | -        | -                       | -                       |
|  | <b>LR HPV types<sup>2</sup></b> |           |                         |                         |           |                         |                         |          |                         |                         |
|  | 42                              | 3         | 1.4 (0.0-3.0)           | 2.3 (0.0-4.9)           | 3         | 3.3 (0.0-7.0)           | 3.8 (0.0-8.0)           | -        | -                       | -                       |
|  | 84                              | 2         | 0.9 (0.0-2.2)           | 1.5 (0.0-3.7)           | -         | -                       | -                       | -        | -                       | -                       |
|  | 62                              | 1         | 0.5 (0.0-1.4)           | 0.8 (0.0-2.3)           | 1         | 1.1 (0.0-3.2)           | 1.3 (0.0-3.7)           | -        | -                       | -                       |
|  | 61                              | 2         | 0.9 (0.0-2.2)           | 1.5 (0.0-3.7)           | -         | -                       | -                       | -        | -                       | -                       |
|  | 6                               | -         | -                       | -                       | 1         | 1.1 (0.0-3.2)           | 1.3 (0.0-3.7)           | -        | -                       | -                       |
|  | 55                              | 7         | 3.3 (0.9-5.7)           | 5.4 (1.5-9.3)           | -         | -                       | -                       | -        | -                       | -                       |
|  | 81                              | -         | -                       | -                       | 2         | 2.2 (0.0-5.2)           | 2.5 (0.0-6.0)           | -        | -                       | -                       |
|  | 89                              | -         | -                       | -                       | -         | -                       | -                       | -        | -                       | -                       |
|  | 54                              | -         | -                       | -                       | -         | -                       | -                       | -        | -                       | -                       |
|  | 11                              | -         | -                       | -                       | -         | -                       | -                       | -        | -                       | -                       |
|  | 43                              | -         | -                       | -                       | -         | -                       | -                       | -        | -                       | -                       |
|  | 72                              | -         | -                       | -                       | -         | -                       | -                       | -        | -                       | -                       |
|  | 83                              | -         | -                       | -                       | -         | -                       | -                       | -        | -                       | -                       |
|  | 40                              | -         | -                       | -                       | -         | -                       | -                       | -        | -                       | -                       |
|  | <b>X</b>                        | <b>3</b>  | <b>1.4 (0.0-3.0)</b>    | <b>2.3 (0.0-4.9)</b>    | <b>1</b>  | <b>1.1 (0.0-3.2)</b>    | <b>1.3 (0.0-3.7)</b>    | -        | -                       | -                       |
|  | <b>Multiple types</b>           | <b>61</b> | <b>28.5 (22.5-34.6)</b> | <b>46.9 (38.3-55.5)</b> | <b>49</b> | <b>53.8 (43.6-64.1)</b> | <b>62.0 (51.3-72.7)</b> | <b>6</b> | <b>50.0 (21.7-78.3)</b> | <b>60.0 (29.6-90.4)</b> |
|  | <b>Number of multiple types</b> |           |                         |                         |           |                         |                         |          |                         |                         |
|  | 2 types                         | 28        | 13.1 (8.6-17.6)         | 21.5 (14.5-28.6)        | 20        | 22.0 (13.5-30.5)        | 25.3 (15.7-34.9)        | 2        | 16.7 (0.0-37.8)         | 20.0 (0.0-44.8)         |
|  | 3 types                         | 19        | 8.9 (5.1-12.7)          | 14.6 (8.5-20.7)         | 12        | 13.2 (6.2-20.1)         | 15.2 (7.3-23.1)         | 3        | 25.0 (0.5-49.5)         | 30.0 (1.6-58.4)         |
|  | 4 types                         | 9         | 4.2 (1.5-6.9)           | 6.9 (2.6-11.3)          | 7         | 7.7 (2.2-13.2)          | 8.9 (2.6-15.1)          | 0        | 0.0 (0.0-0.0)           | 0.0 (0.0-0.0)           |
|  | 5 or more types                 | 5         | 2.3 (0.3-4.4)           | 3.8 (0.5-7.2)           | 10        | 11.0 (4.6-17.4)         | 12.7 (5.3-20.0)         | 1        | 8.3 (0.0-24.0)          | 10.0 (0.0-28.6)         |

**Most frequent combinations**

|                |    |                |                 |    |                 |                 |   |                 |                 |
|----------------|----|----------------|-----------------|----|-----------------|-----------------|---|-----------------|-----------------|
| 16 with others | 16 | 7.5 (4.0-11.0) | 12.3 (6.7-18.0) | 22 | 24.2 (15.4-33)  | 27.8 (18-37.7)  | 2 | 16.7 (0.0-37.8) | 20.0 (0.0-44.8) |
| 51 with others | 12 | 5.6 (2.5-8.7)  | 9.2 (4.3-14.2)  | 9  | 9.9 (3.8-16.0)  | 11.4 (4.4-18.4) | 1 | 8.3 (0.0-24.0)  | 10.0 (0.0-28.6) |
| 53 with others | 16 | 7.5 (4.0-11.0) | 12.3 (6.7-18.0) | 14 | 15.4 (8.0-22.8) | 17.7 (9.3-26.1) | 1 | 8.3 (0.0-24.0)  | 10.0 (0.0-28.6) |
| 31 with others | 7  | 3.3 (0.9-5.7)  | 5.4 (1.5-9.3)   | 6  | 6.6 (1.5-11.7)  | 7.6 (1.8-13.4)  | 3 | 25.0 (0.5-49.5) | 30.0 (1.6-58.4) |
| 42 with others | 9  | 4.2 (1.5-6.9)  | 6.9 (2.6-11.3)  | 7  | 7.7 (2.2-13.2)  | 8.9 (2.6-15.1)  | 1 | 8.3 (0.0-24.0)  | 10.0 (0.0-28.6) |
| 6 with others  | 5  | 2.3 (0.3-4.4)  | 3.8 (0.5-7.2)   | 4  | 4.4 (0.2-8.6)   | 5.1 (0.2-9.9)   | - | -               | -               |
| 18 with others | 2  | 0.9 (0.0-2.2)  | 1.5 (0.0-3.7)   | 4  | 4.4 (0.2-8.6)   | 5.1 (0.2-9.9)   | - | -               | -               |
| 33 with others | 1  | 0.5 (0.0-1.4)  | 0.8 (0.0-2.3)   | 2  | 2.2 (0.0-5.2)   | 2.5 (0.0-6.0)   | - | -               | -               |
| 59 with others | 8  | 3.7 (1.2-6.3)  | 6.2 (2.0-10.3)  | 8  | 8.8 (3.0-14.6)  | 10.1 (3.5-16.8) | 1 | 8.3 (0.0-24.0)  | 10.0 (0.0-28.6) |
| 39 with others | 8  | 3.7 (1.2-6.3)  | 6.2 (2.0-10.3)  | 1  | 1.1 (0.0-3.2)   | 1.3 (0.0-3.7)   | 1 | 8.3 (0.0-24.0)  | 10.0 (0.0-28.6) |
| 35 with others | 3  | 1.4 (0.0-3.0)  | 2.3 (0.0-4.9)   | 2  | 2.2 (0.0-5.2)   | 2.5 (0.0-6.0)   | 1 | 8.3 (0.0-24.0)  | 10.0 (0.0-28.6) |
| 52 with others | 4  | 1.9 (0.1-3.7)  | 3.1 (0.1-6.0)   | 8  | 8.8 (3.0-14.6)  | 10.1 (3.5-16.8) | 2 | 16.7 (0.0-37.8) | 20.0 (0.0-44.8) |
| 56 with others | 6  | 2.8 (0.6-5.0)  | 4.6 (1.0-8.2)   | 8  | 8.8 (3.0-14.6)  | 10.1 (3.5-16.8) | - | -               | -               |
| 58 with others | 5  | 2.3 (0.3-4.4)  | 3.8 (0.5-7.2)   | 5  | 5.5 (0.8-10.2)  | 6.3 (1.0-11.7)  | - | -               | -               |
| 62 with others | 5  | 2.3 (0.3-4.4)  | 3.8 (0.5-7.2)   | 4  | 4.4 (0.2-8.6)   | 5.1 (0.2-9.9)   | - | -               | -               |
| 61 with others | 7  | 3.3 (0.9-5.7)  | 5.4 (1.5-9.3)   | 8  | 8.8 (3.0-14.6)  | 10.1 (3.5-16.8) | - | -               | -               |
| 66 with others | 6  | 2.8 (0.6-5.0)  | 4.6 (1.0-8.2)   | 6  | 6.6 (1.5-11.7)  | 7.6 (1.8-13.4)  | - | -               | -               |
| 45 with others | 3  | 1.4 (0.0-3.0)  | 2.3 (0.0-4.9)   | 4  | 4.4 (0.2-8.6)   | 5.1 (0.2-9.9)   | 3 | 25 (0.5-49.5)   | 30.0 (1.6-58.4) |
| 68 with others | 6  | 2.8 (0.6-5.0)  | 4.6 (1.0-8.2)   | 3  | 3.3 (0.0-7.0)   | 3.8 (0.0-8.0)   | 1 | 8.3 (0.0-24.0)  | 10.0 (0.0-28.6) |
| 54 with others | 8  | 3.7 (1.2-6.3)  | 6.2 (2.0-10.3)  | 4  | 4.4 (0.2-8.6)   | 5.1 (0.2-9.9)   | - | -               | -               |
| 70 with others | 1  | 0.5 (0.0-1.4)  | 0.8 (0.0-2.3)   | 3  | 3.3 (0.0-7.0)   | 3.8 (0.0-8.0)   | - | -               | -               |
| 84 with others | 4  | 1.9 (0.1-3.7)  | 3.1 (0.1-6.0)   | 4  | 4.4 (0.2-8.6)   | 5.1 (0.2-9.9)   | - | -               | -               |
| 55 with others | 4  | 1.9 (0.1-3.7)  | 3.1 (0.1-6.0)   | 3  | 3.3 (0.0-7.0)   | 3.8 (0.0-8.0)   | - | -               | -               |
| 11 with others | 1  | 0.5 (0.0-1.4)  | 0.8 (0.0-2.3)   | 1  | 1.1 (0.0-3.2)   | 1.3 (0.0-3.7)   | - | -               | -               |
| 81 with others | 6  | 2.8 (0.6-5.0)  | 4.6 (1.0-8.2)   | 3  | 3.3 (0.0-7.0)   | 3.8 (0.0-8.0)   | - | -               | -               |

|                                        |    |                  |                  |    |                  |                  |   |                  |                   |
|----------------------------------------|----|------------------|------------------|----|------------------|------------------|---|------------------|-------------------|
| 40 with others                         | -  | -                | -                | -  | -                | -                | - | -                | -                 |
| 89 with others                         | 8  | 3.7 (1.2-6.3)    | 6.2 (2.0-10.3)   | 6  | 6.6 (1.5-11.7)   | 7.6 (1.8-13.4)   | - | -                | -                 |
| 67 with others                         | 3  | 1.4 (0.0-3.0)    | 2.3 (0.0-4.9)    | 1  | 1.1 (0.0-3.2)    | 1.3 (0.0-3.7)    | - | -                | -                 |
| 69 with others                         | -  | -                | -                | -  | -                | -                | - | -                | -                 |
| 73 with others                         | 3  | 1.4 (0.0-3.0)    | 2.3 (0.0-4.9)    | 4  | 4.4 (0.2-8.6)    | 5.1 (0.2-9.9)    | 0 | 0.0 (0.0-0.0)    | 0.0 (0.0-0.0)     |
| 83 with others                         | 5  | 2.3 (0.3-4.4)    | 3.8 (0.5-7.2)    | 1  | 1.1 (0.0-3.2)    | 1.3 (0.0-3.7)    | - | -                | -                 |
| 43 with others                         | -  | -                | -                | -  | -                | -                | - | -                | -                 |
| 72 with others                         | 1  | 0.5 (0.0-1.4)    | 0.8 (0.0-2.3)    | 3  | 3.3 (0.0-7.0)    | 3.8 (0.0-8.0)    | - | -                | -                 |
| 69/71 with others                      | -  | -                | -                | -  | -                | -                | - | -                | -                 |
| 71 with others                         | 2  | 0.9 (0.0-2.2)    | 1.5 (0.0-3.7)    | 1  | 1.1 (0.0-3.2)    | 1.3 (0.0-3.7)    | - | -                | -                 |
| 74 with others                         | 1  | 0.5 (0.0-1.4)    | 0.8 (0.0-2.3)    | -  | -                | -                | - | -                | -                 |
| 64 with others                         | 1  | 0.5 (0.0-1.4)    | 0.8 (0.0-2.3)    | -  | -                | -                | - | -                | -                 |
| 82 with others                         | 2  | 0.9 (0.0-2.2)    | 1.5 (0.0-3.7)    | -  | -                | -                | 1 | 8.3 (0.0-24.0)   | 10.0 (0.0-28.6)   |
| <b>Combinations of vaccine types</b>   |    |                  |                  |    |                  |                  |   |                  |                   |
| 6/11 <sup>3</sup>                      | 6  | 2.8 (0.6-5.0)    | 4.6 (1.0-8.2)    | 6  | 6.6 (1.5-11.7)   | 7.6 (1.8-13.4)   | - | -                | -                 |
| 16/18 <sup>3</sup>                     | 31 | 14.5 (9.8-19.2)  | 23.8 (16.5-31.2) | 27 | 29.7 (20.3-39.1) | 34.2 (23.7-44.6) | 4 | 33.3 (6.7-60.0)  | 40.0 (9.6-70.4)   |
| 6/11/16/18 <sup>3</sup>                | 37 | 17.3 (12.2-22.4) | 28.5 (20.7-36.2) | 31 | 34.1 (24.3-43.8) | 39.2 (28.5-50.0) | 4 | 33.3 (6.7-60.0)  | 40.0 (9.6-70.4)   |
| 6/11/16/18/31/33/45/52/58 <sup>3</sup> | 57 | 26.6 (20.7-32.6) | 43.8 (35.3-52.4) | 45 | 49.5 (39.2-59.7) | 57.0 (46.0-67.9) | 8 | 66.7 (40.0-93.3) | 80.0 (55.2-100.0) |

HPV: Human Papillomavirus; HR: High-Risk; LR: Low-Risk; CI: Confidence Interval.

<sup>1</sup> HR types includes high-risk types and possibly /probably high-risk types: 16, 18, 31, 33, 35, 39, 45, 51, 52, 56, 58, 59, 53, 66, 67, 68, 69, 69/71, 70, 73. <sup>2</sup> LR types includes: 6, 11, 40, 42, 43, 54, 55, 61, 62, 72, 81, 83, 84, 89. <sup>3</sup> One or more of the vaccine types are concerned.

**Supplementary Table 6 – Crude and multivariate analyses of the association between cervical High-Risk Human Papillomavirus (HR HPV) infection and selected subjects' characteristics (n=5,858 women).**

| Study sample characteristics    |                                             | Number of HR HPV positive women / number of HPV tested women (negative + HR HPV positive) | HPV prevalence (%) | Adjusted model <sup>1</sup> POR (95% CI) |
|---------------------------------|---------------------------------------------|-------------------------------------------------------------------------------------------|--------------------|------------------------------------------|
| <b>Population</b>               |                                             |                                                                                           |                    |                                          |
|                                 | Gran Canaria                                | 407 / 3,753                                                                               | 10.8               | 1.0 (ref)                                |
|                                 | Tenerife                                    | 261 / 2,105                                                                               | 12.4               | 1.0 (0.8-1.2)                            |
| <b>Age distribution (years)</b> |                                             |                                                                                           |                    |                                          |
|                                 | 18-24                                       | 135 / 549                                                                                 | 24.6               | <b>2.9 (1.7-4.8)</b>                     |
|                                 | 25-29                                       | 129 / 639                                                                                 | 20.2               | <b>2.2 (1.3-3.5)</b>                     |
|                                 | 30-34                                       | 136 / 869                                                                                 | 15.7               | <b>1.7 (1.0-2.7)</b>                     |
|                                 | 35-39                                       | 71 / 865                                                                                  | 8.2                | 0.9 (0.5-1.4)                            |
|                                 | 40-44                                       | 67 / 771                                                                                  | 8.7                | 1.0 (0.6-1.6)                            |
|                                 | 45-49                                       | 44 / 607                                                                                  | 7.2                | 0.8 (0.5-1.3)                            |
|                                 | 50-54                                       | 30 / 594                                                                                  | 5.1                | 0.6 (0.4-1.1)                            |
|                                 | 55-59                                       | 27 / 480                                                                                  | 5.6                | 0.8 (0.5-1.4)                            |
|                                 | 60-65                                       | 29 / 484                                                                                  | 6.0                | 1.0 (ref)                                |
|                                 | <i>p-value for trend</i>                    |                                                                                           |                    | <b><i>p&lt;0.001</i></b>                 |
| <b>Level of education</b>       |                                             |                                                                                           |                    |                                          |
|                                 | None / Preschool                            | 29 / 438                                                                                  | 6.6                | 1.0 (ref)                                |
|                                 | Primary                                     | 246 / 2,588                                                                               | 9.5                | 0.9 (0.6-1.5)                            |
|                                 | Secondary                                   | 201 / 1,437                                                                               | 14.0               | 0.9 (0.5-1.3)                            |
|                                 | University or higher                        | 178 / 1,296                                                                               | 13.7               | 0.9 (0.5-1.4)                            |
|                                 | Others                                      | 13 / 90                                                                                   | 14.4               | 0.8 (0.4-1.8)                            |
|                                 | Missing data                                | 1 / 9                                                                                     | -                  | -                                        |
|                                 | <i>p-value for trend (excluding others)</i> |                                                                                           |                    | <i>p=0.3</i>                             |
| <b>Marital status</b>           |                                             |                                                                                           |                    |                                          |
|                                 | Single                                      | 283 / 1,333                                                                               | 21.2               | <b>1.5 (1.2-1.9)</b>                     |
|                                 | Married/de facto partnership                | 267 / 3,792                                                                               | 7.0                | 1.0 (ref)                                |
|                                 | Divorced/separated                          | 99 / 541                                                                                  | 18.3               | <b>2.0 (1.5-2.7)</b>                     |
|                                 | Widowed                                     | 18 / 184                                                                                  | 9.8                | <b>1.8 (1.0-3.1)</b>                     |
|                                 | Missing data                                | 1 / 8                                                                                     | -                  | -                                        |
| <b>Number of live births</b>    |                                             |                                                                                           |                    |                                          |
|                                 | No <sup>2</sup>                             | 240 / 1,307                                                                               | 18.4               | 1.0 (ref)                                |
|                                 | 1                                           | 137 / 1,202                                                                               | 11.4               | 0.9 (0.7-1.2)                            |
|                                 | 2                                           | 136 / 1,725                                                                               | 7.9                | 1.0 (0.8-1.4)                            |
|                                 | 3                                           | 53 / 754                                                                                  | 7.0                | 1.1 (0.7-1.6)                            |
|                                 | ≥4                                          | 27 / 448                                                                                  | 6.0                | 1.0 (0.6-1.7)                            |
|                                 | Missing data                                | 75 / 422                                                                                  | -                  | -                                        |
| <b>Smoking status</b>           |                                             |                                                                                           |                    |                                          |
|                                 | Never smoked                                | 298 / 3,324                                                                               | 9.0                | 1.0 (ref)                                |
|                                 | Ex smoker                                   | 102 / 876                                                                                 | 11.6               | 1.2 (0.9-1.5)                            |

|                                                |                           |             |      |                       |
|------------------------------------------------|---------------------------|-------------|------|-----------------------|
|                                                | Current smoker            | 268 / 1,658 | 16.2 | <b>1.3 (1.1-1.6)</b>  |
| <b>Age at first sexual intercourse (years)</b> |                           |             |      |                       |
|                                                | <15                       | 35 / 179    | 19.6 | 1.0 (0.5-1.8)         |
|                                                | 15-16                     | 136 / 787   | 17.3 | 1.0 (0.6-1.6)         |
|                                                | 17-18                     | 235 / 1,797 | 13.1 | 1.0 (0.6-1.6)         |
|                                                | 19-20                     | 118 / 1,241 | 9.5  | 1.0 (0.6-1.5)         |
|                                                | 21-25                     | 112 / 1,368 | 8.2  | 1.2 (0.7-1.8)         |
|                                                | >25                       | 26 / 418    | 6.2  | 1.0 (ref)             |
|                                                | Missing data              | 6 / 68      | -    | -                     |
|                                                | <i>p-value for trend</i>  |             |      | <i>p=0.6</i>          |
| <b>Lifetime number of sexual partners</b>      |                           |             |      |                       |
|                                                | 1                         | 160 / 3,135 | 5.1  | 1.0 (ref)             |
|                                                | 2-3                       | 224 / 1,495 | 15.0 | <b>2.3 (1.9-2.9)</b>  |
|                                                | 4-5                       | 124 / 596   | 20.8 | <b>3.1 (2.3-4.0)</b>  |
|                                                | 6-10                      | 100 / 376   | 26.6 | <b>4.1 (3.0-5.6)</b>  |
|                                                | 11-20                     | 36 / 121    | 29.8 | <b>4.6 (2.9-7.3)</b>  |
|                                                | >20                       | 16 / 47     | 34.0 | <b>7.1 (3.7-13.6)</b> |
|                                                | Missing data              | 8 / 88      | -    | -                     |
|                                                | <i>p-value for trend</i>  |             |      | <i>p&lt;0.001</i>     |
| <b>Use of oral contraceptives</b>              |                           |             |      |                       |
|                                                | Never                     | 126 / 1,366 | 9.2  | 1.0 (ref)             |
|                                                | Ever                      | 542 / 4,492 | 12.1 | 1.2 (0.97-1.5)        |
| <b>Rhythm method/coitus interruptus</b>        |                           |             |      |                       |
|                                                | Never                     | 316 / 2,933 | 10.8 | 1.0 (ref)             |
|                                                | Ever                      | 352 / 2,925 | 12.0 | 1.1 (0.96-1.4)        |
| <b>Previous cervical lesions</b>               |                           |             |      |                       |
|                                                | No                        | 527 / 4,868 | 10.8 | 1.0 (ref)             |
|                                                | Yes                       | 70 / 364    | 19.2 | <b>1.5 (1.1-2.0)</b>  |
|                                                | Missing data <sup>3</sup> | 71 / 626    | -    | -                     |
| <b>Genital warts</b>                           |                           |             |      |                       |
|                                                | Never                     | 633 / 5,744 | 11.0 | 1.0 (ref)             |
|                                                | Ever                      | 35 / 114    | 30.7 | <b>2.0 (1.3-3.2)</b>  |

<sup>1</sup> Adjusted model: adjusted for age group, population, level of education, marital status, smoking habits, lifetime number of sexual partners, previous cervical lesions, and ever had genital warts. <sup>2</sup> Includes women who were pregnant but had 0 live births. <sup>3</sup> Includes "Do not know" in the "Missing data" category. <sup>4</sup> Includes syphilis, genital herpes, gonorrhoea, HIV (positive test), genital warts, Chlamydia, genital ulcer, others. <sup>5</sup> Excludes ever had genital warts in the adjustment.
